# Supplementary material for: Metamorphic Testing of Machine Learning and Conceptual Hydrologic Models
Source: Copernicus journal article supplement (doi:10.5194/hess-2023-168), 2023-07-26
Supplement: Supplementary file 1 [file hess-2023-168-supplement.pdf]

745 **Supporting Information for**  
**Metamorphic Testing of Machine Learning**  
**and Conceptual hydrologic Models**

by Peter Reichert, Kai Ma, Marvin Höge, Fabrizio Fenicia, Marco Baity Jesi, Dapeng Feng and Chaopeng Shen

In this document we provide some additional results to demonstrate that the results shown in section 3 of the main paper  
750 represent typical pattern also for other, similar basins.

**Metamorphic Testing**

**Low Altitude Warm Basins**

This section provides examples of the modelled response of low altitude, warm basins in addition to the one discussed in  
section 3.2.1. See section 3.2.1 for explanations.

755

The Figures SI.1 to SI.4 show the results for the last two years of the calibration period and for the first two years of the  
validation period for the basin 11468500.

The Figures SI.5 to SI.8 show the results for the last two years of the calibration period and for the first two years of the  
760 validation period for the basin 08014500.

The Figures SI.9 to SI.12 show the results for the last two years of the calibration period and for the first two years of the  
validation period for the basin 02363000.

765 The Figures SI.13 to SI.16 show the results for the last two years of the calibration period and for the first two years of the  
validation period for the basin 12013500.

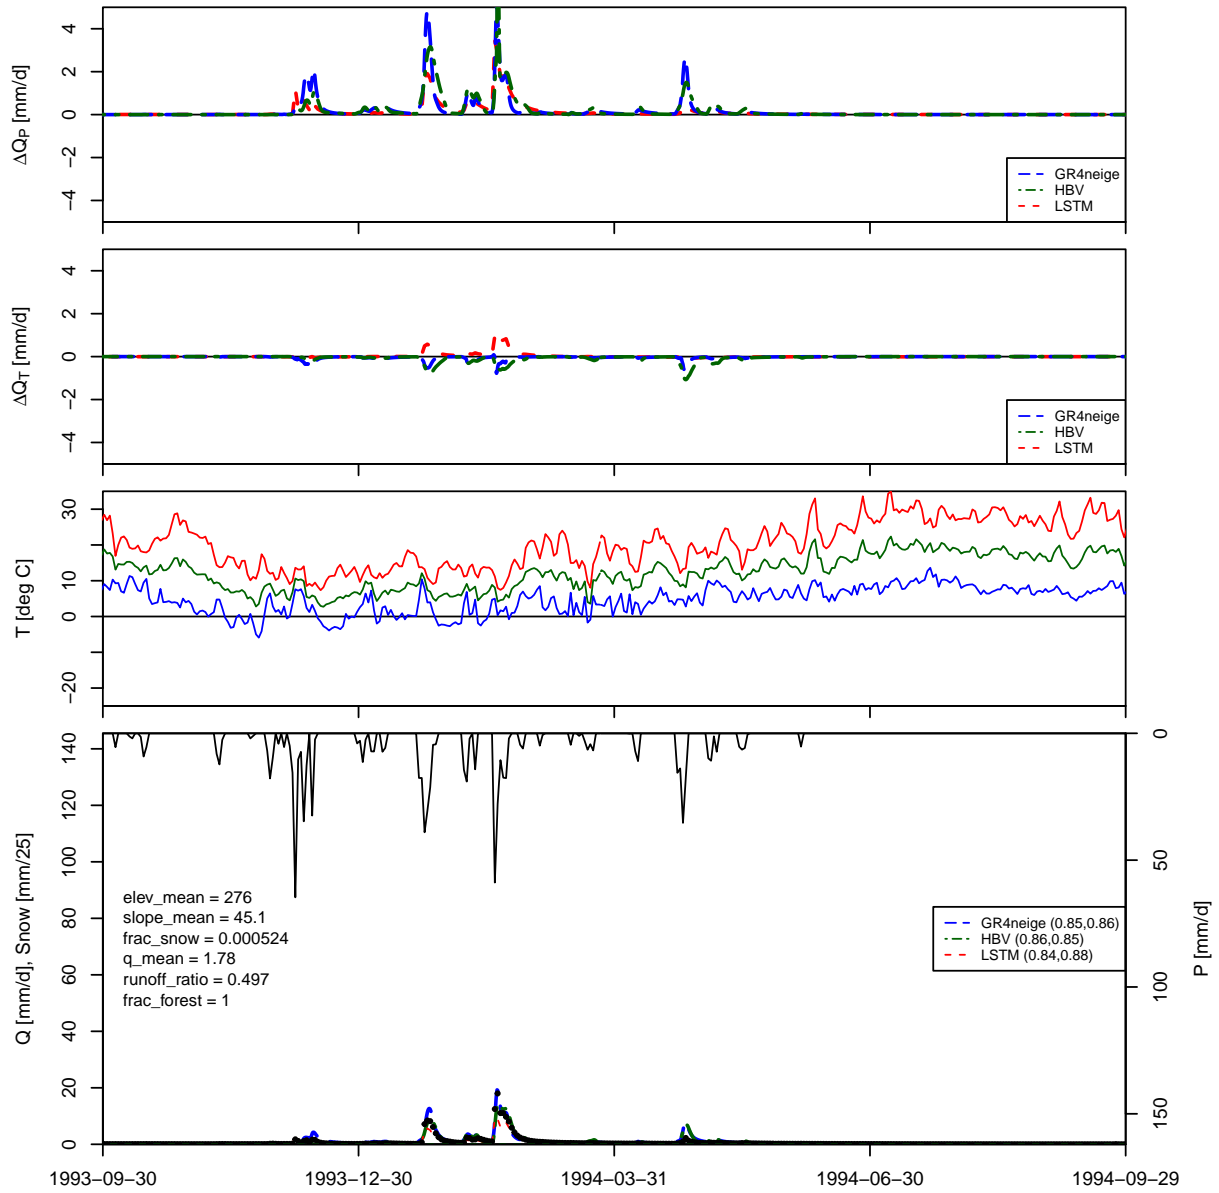

**Figure SI.1.** Results for basin 11468500, Oct. 1993 - Sept. 1994 (part of calibration). See Fig. 3 for an explanation of the plot panels.

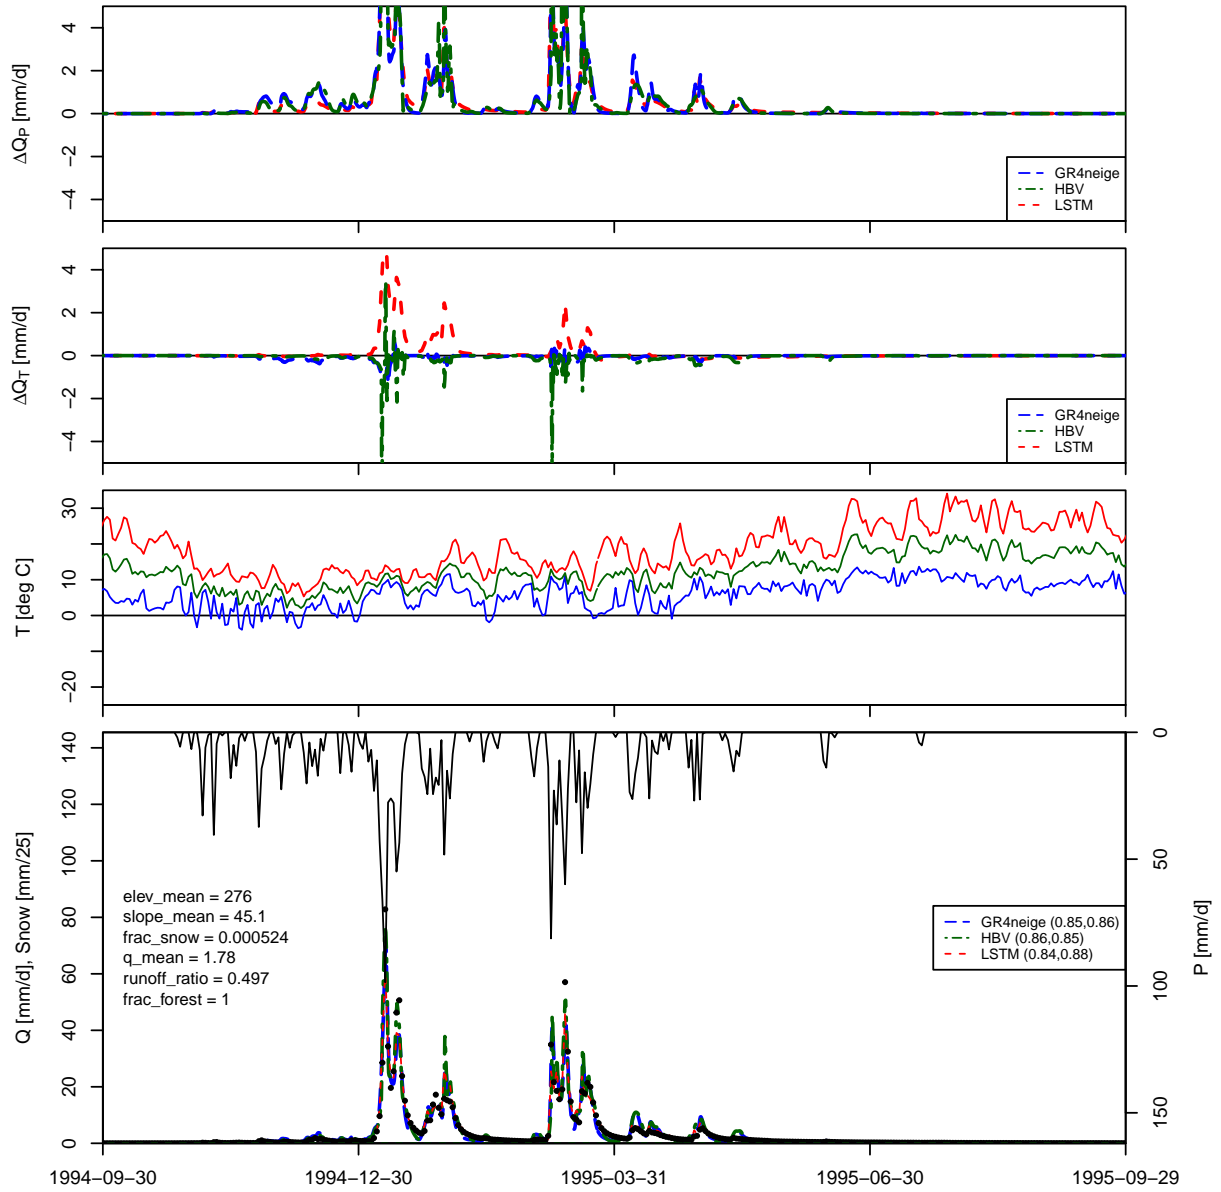

**Figure SI.2.** Results for basin 11468500, Oct. 1994 - Sept. 1995 (part of calibration). See Fig. 3 for an explanation of the plot panels.

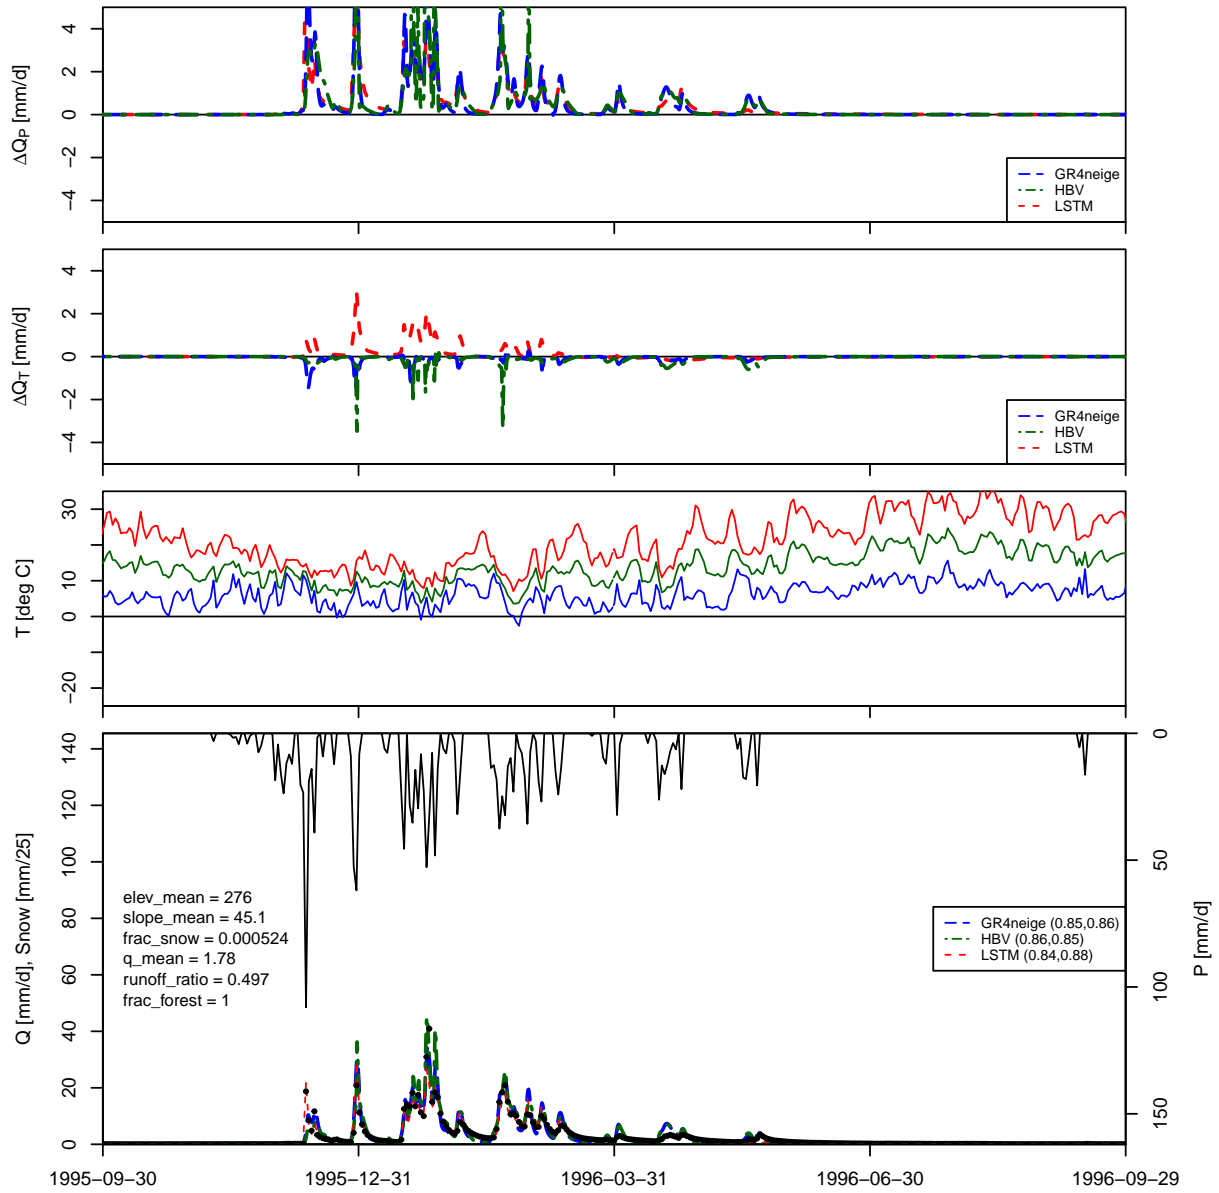

**Figure SI.3.** Results for basin 11468500, Oct. 1995 - Sept. 1996 (part of validation). See Fig. 3 for an explanation of the plot panels.

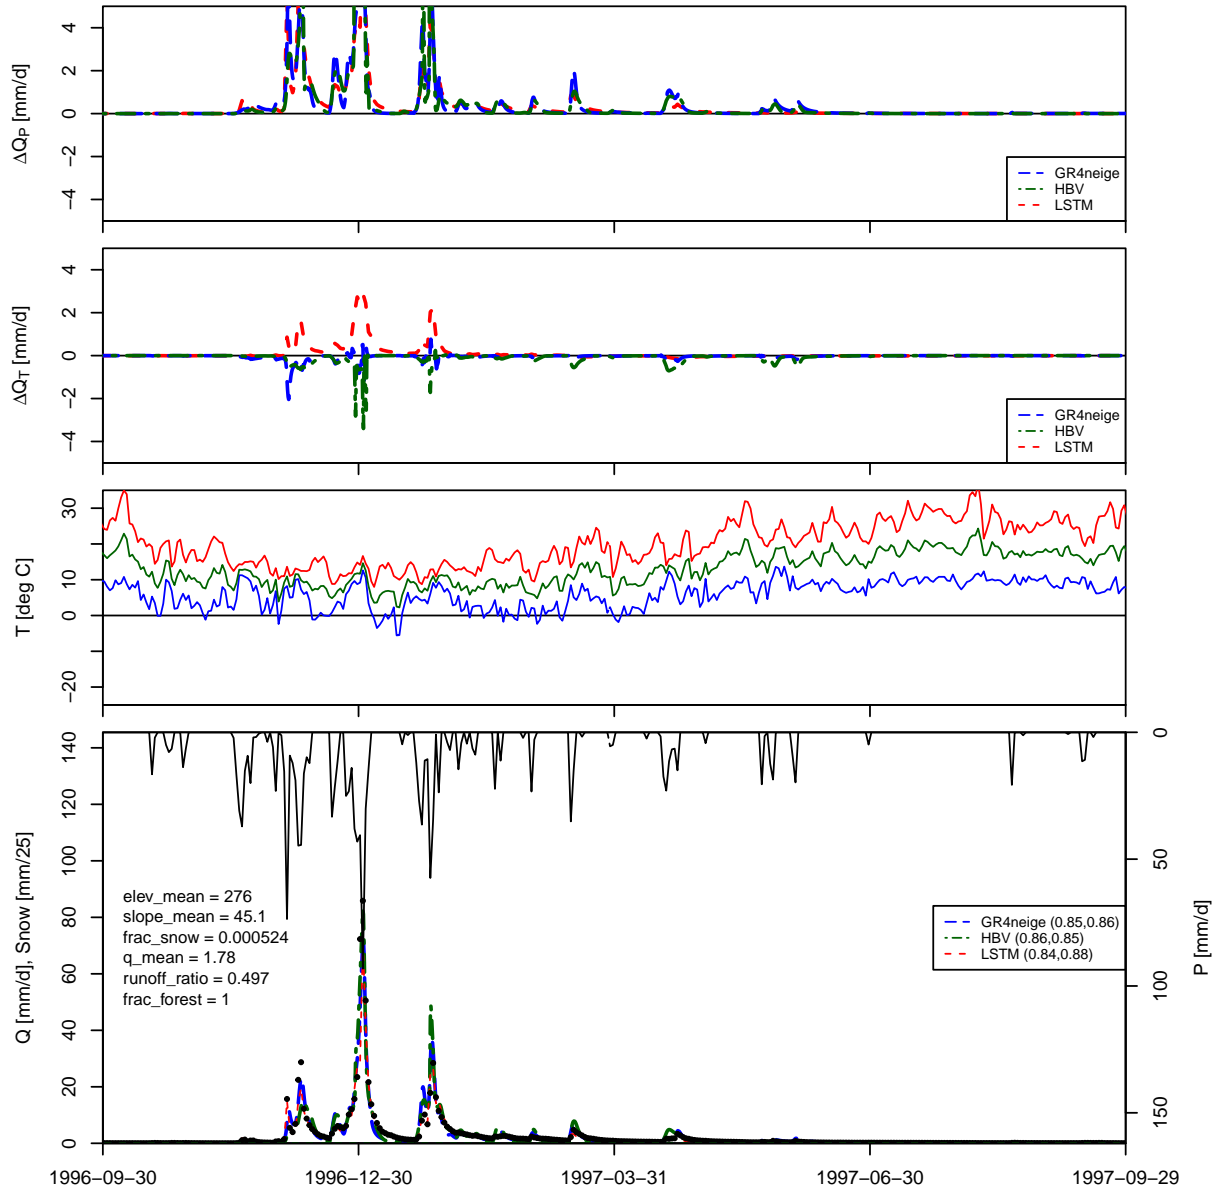

**Figure SI.4.** Results for basin 11468500, Oct. 1996 - Sept. 1997 (part of validation). See Fig. 3 for an explanation of the plot panels.

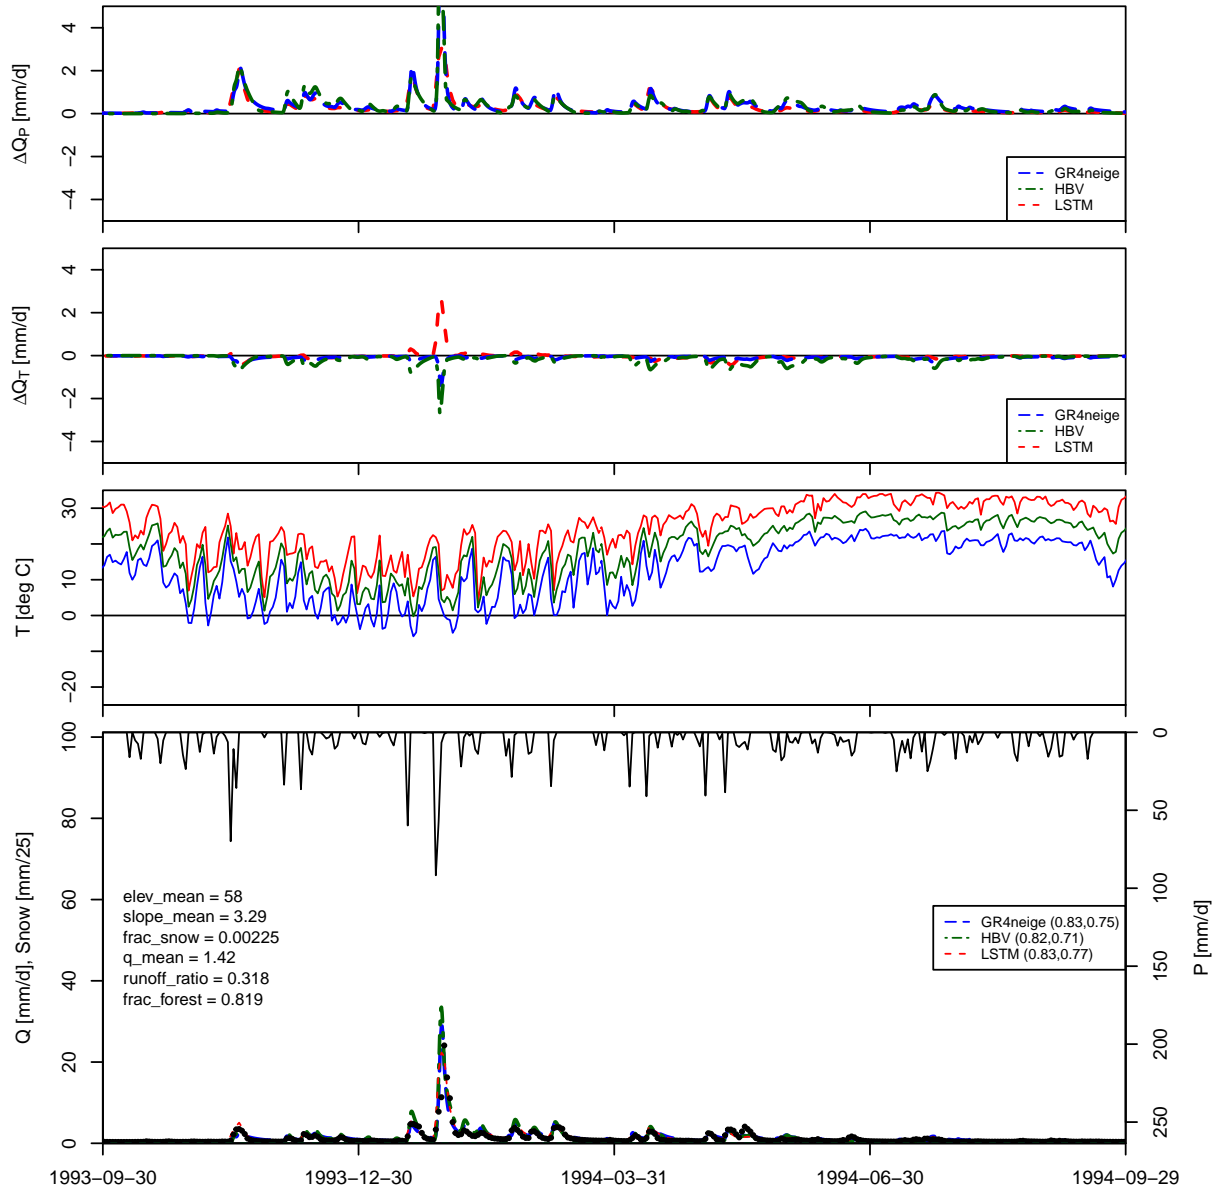

**Figure SI.5.** Results for basin 08014500, Oct. 1993 - Sept. 1994 (part of calibration). See Fig. 3 for an explanation of the plot panels.

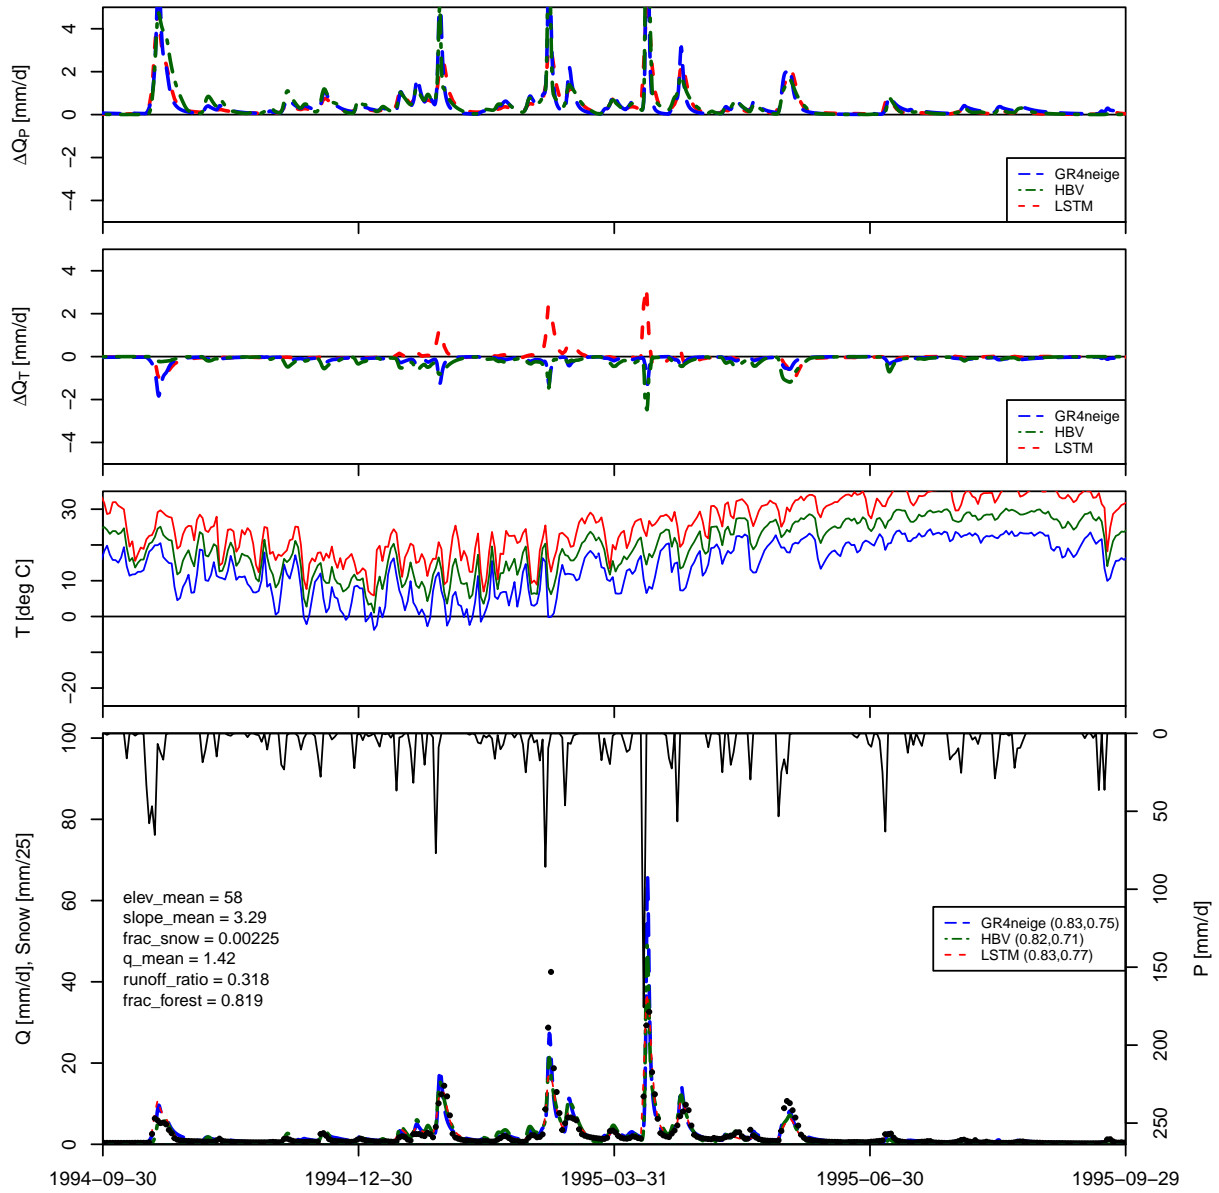

**Figure SL6.** Results for basin 08014500, Oct. 1994 - Sept. 1995 (part of calibration). See Fig. 3 for an explanation of the plot panels.

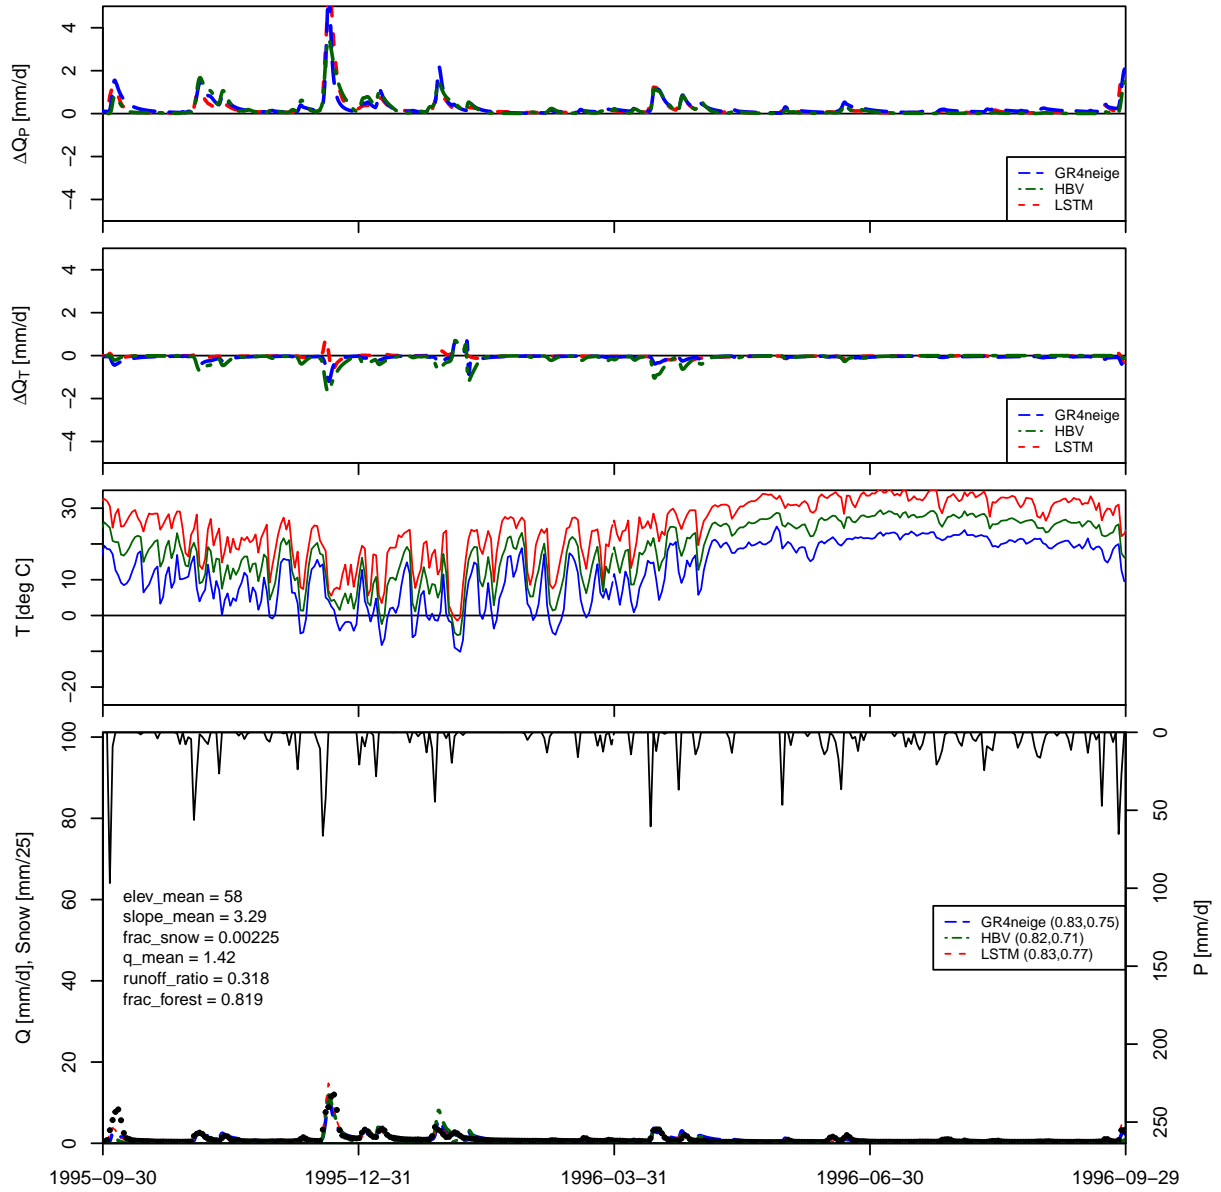

**Figure SI.7.** Results for basin 08014500, Oct. 1995 - Sept. 1996 (part of validation). See Fig. 3 for an explanation of the plot panels.

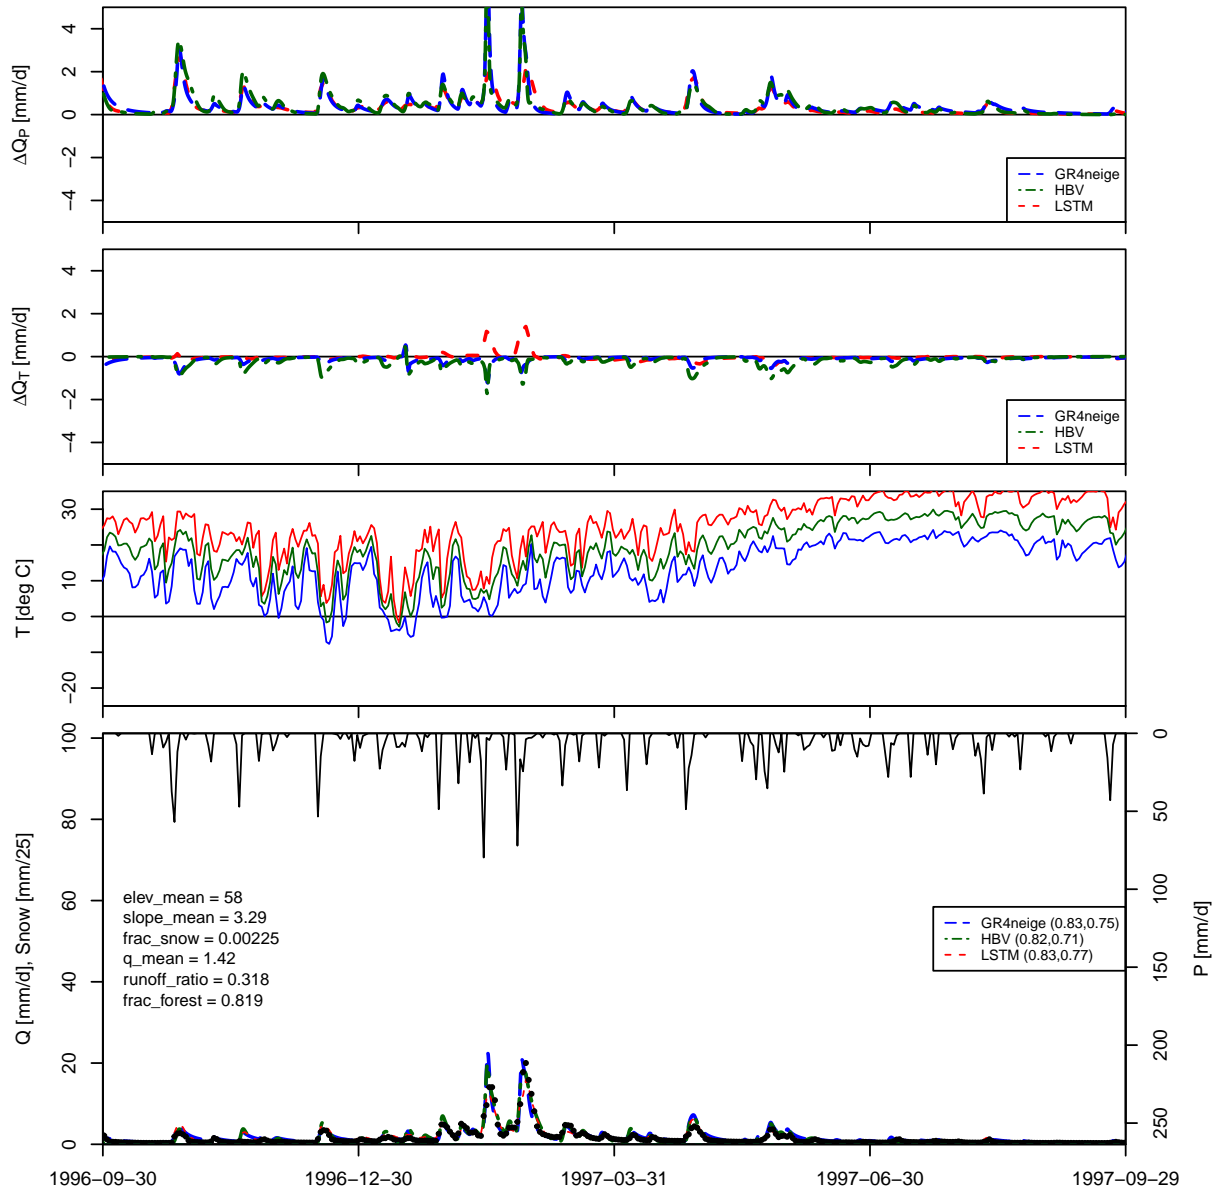

**Figure SI.8.** Results for basin 08014500, Oct. 1996 - Sept. 1997 (part of validation). See Fig. 3 for an explanation of the plot panels.

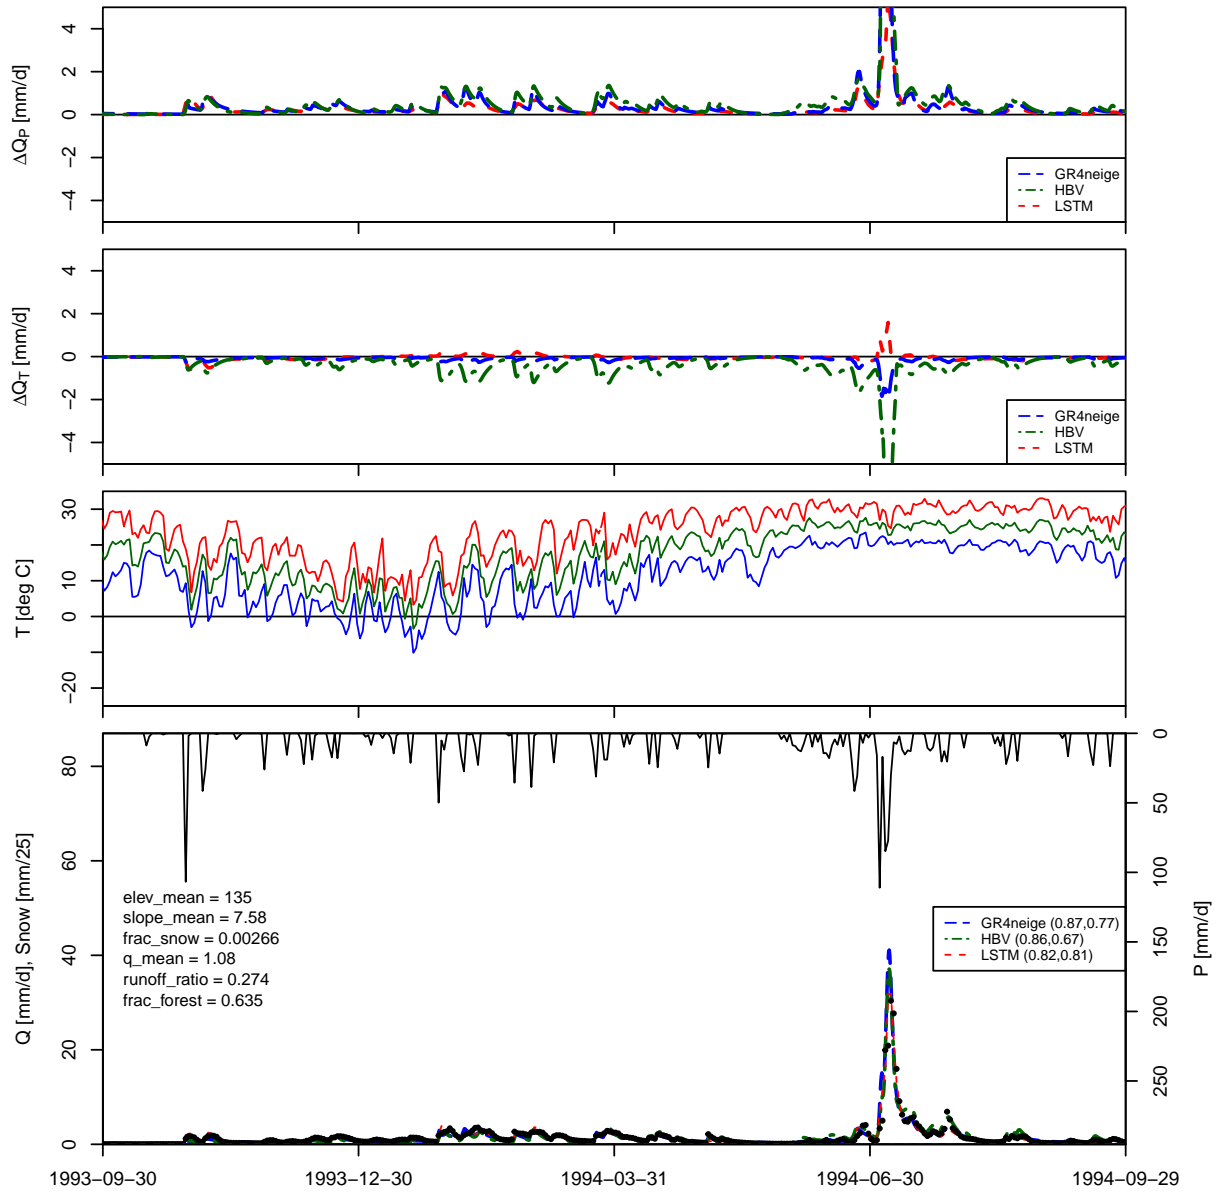

**Figure SL9.** Results for basin 02363000, Oct. 1993 - Sept. 1994 (part of calibration). See Fig. 3 for an explanation of the plot panels.

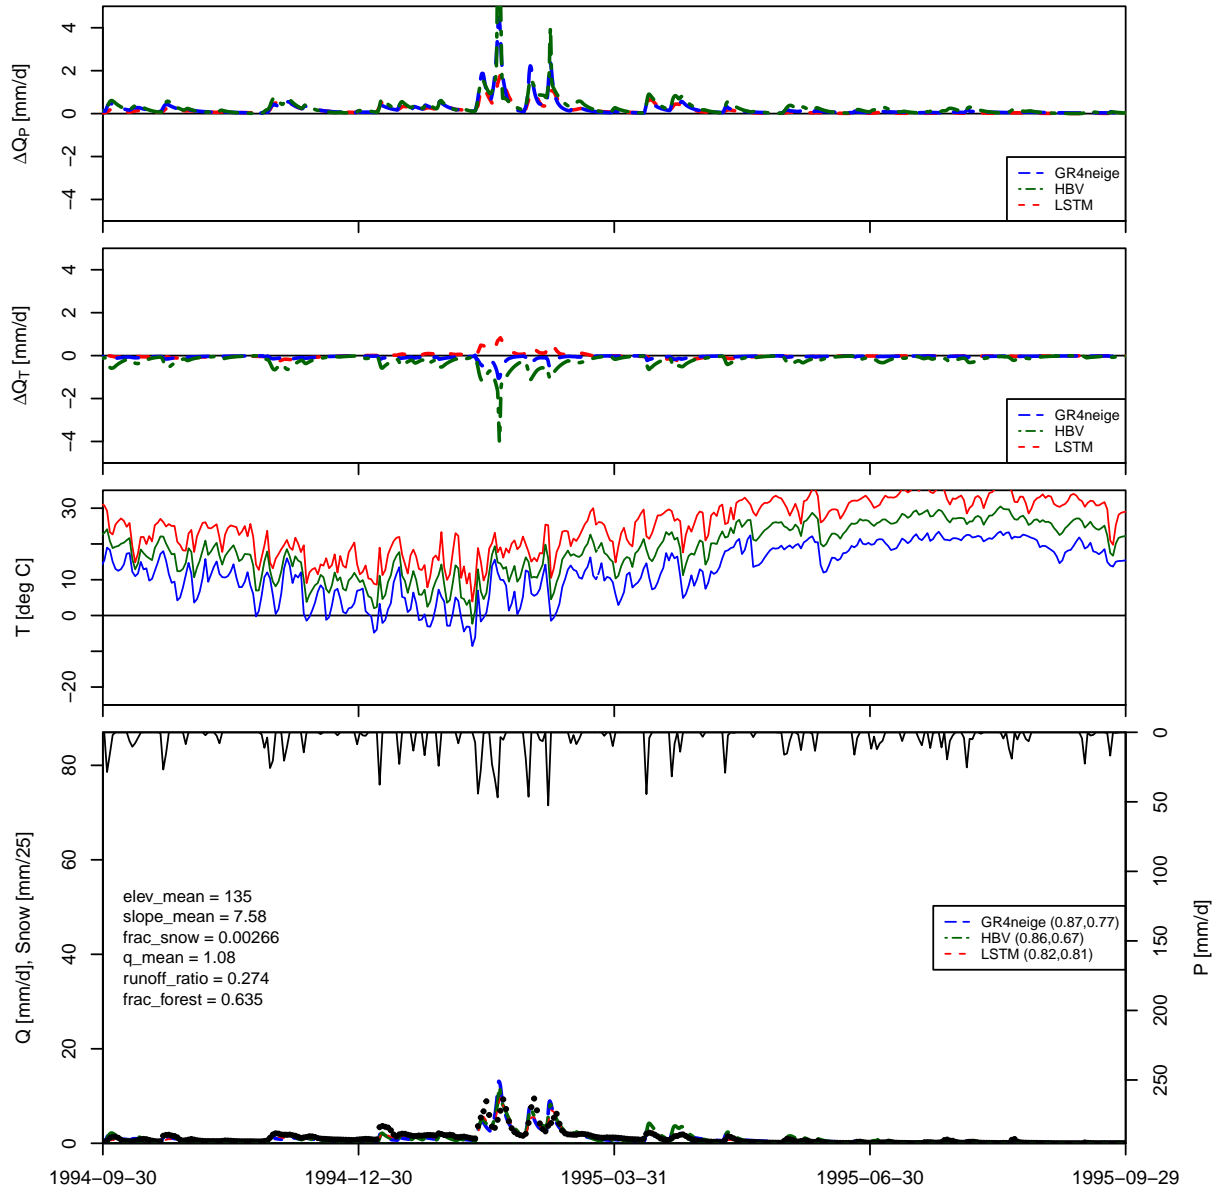

**Figure SL10.** Results for basin 02363000, Oct. 1994 - Sept. 1995 (part of calibration). See Fig. 3 for an explanation of the plot panels.

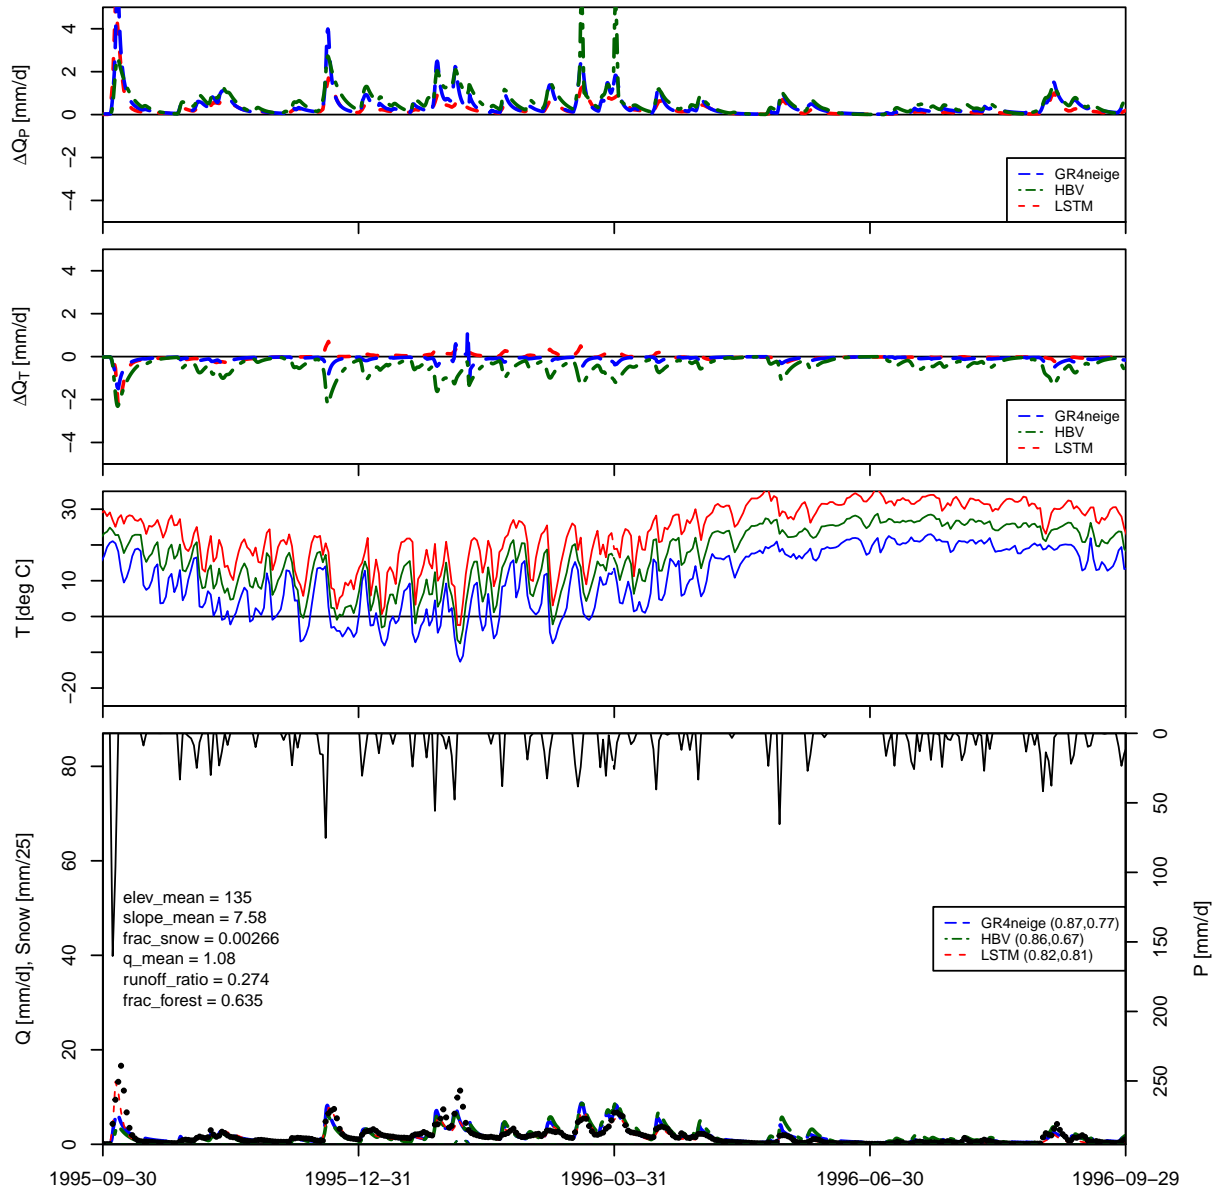

**Figure SL11.** Results for basin 02363000, Oct. 1995 - Sept. 1996 (part of validation). See Fig. 3 for an explanation of the plot panels.

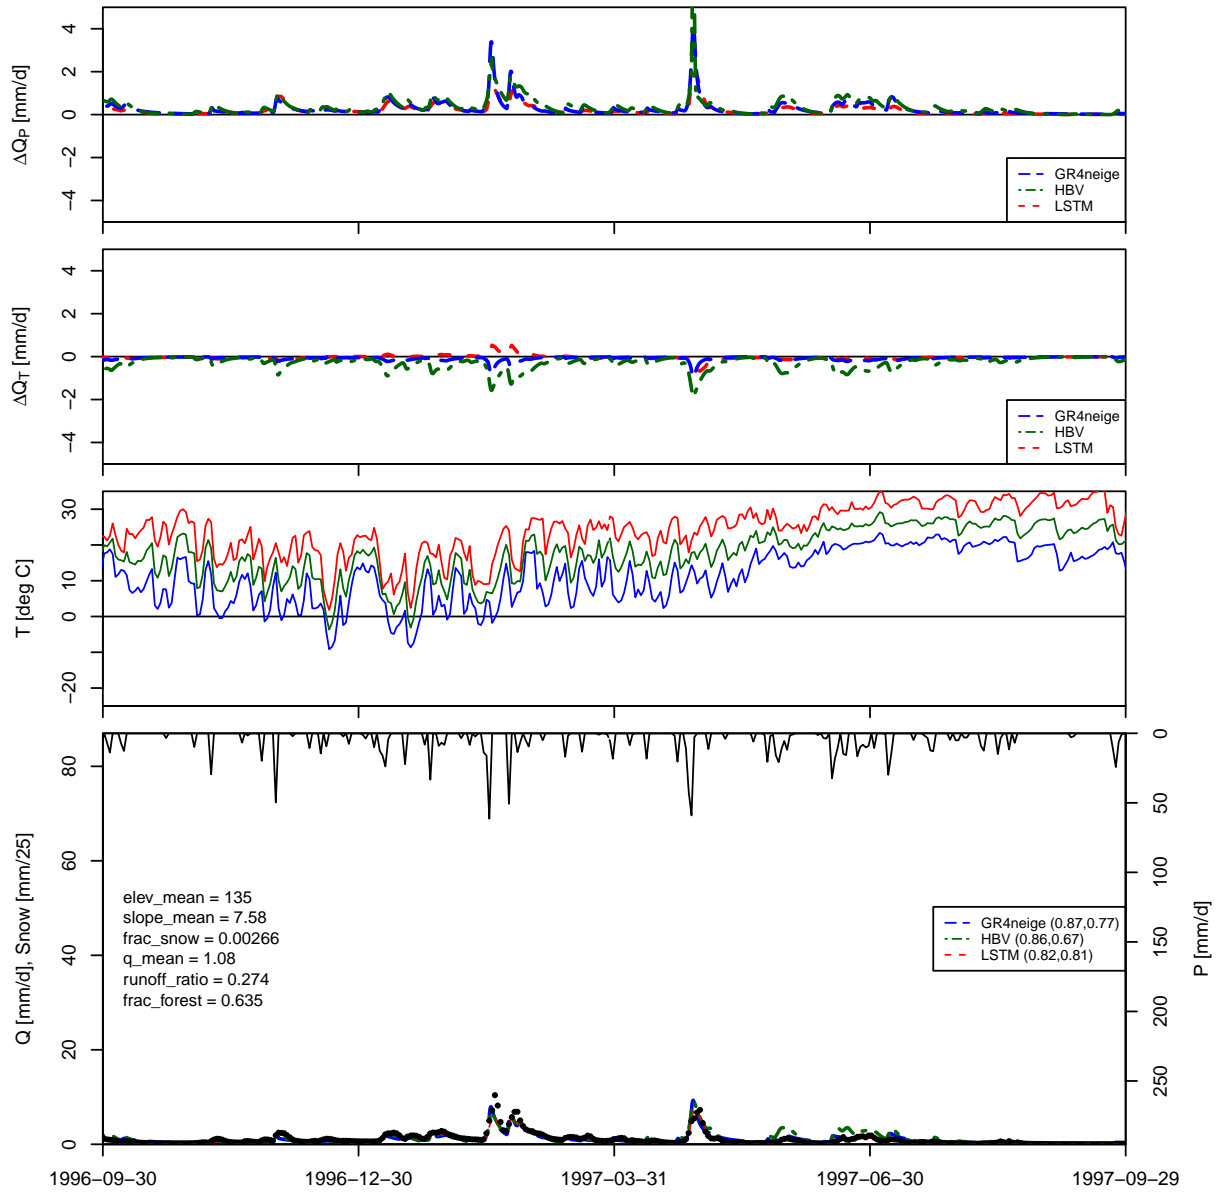

**Figure SL12.** Results for basin 02363000, Oct. 1996 - Sept. 1997 (part of validation). See Fig. 3 for an explanation of the plot panels.

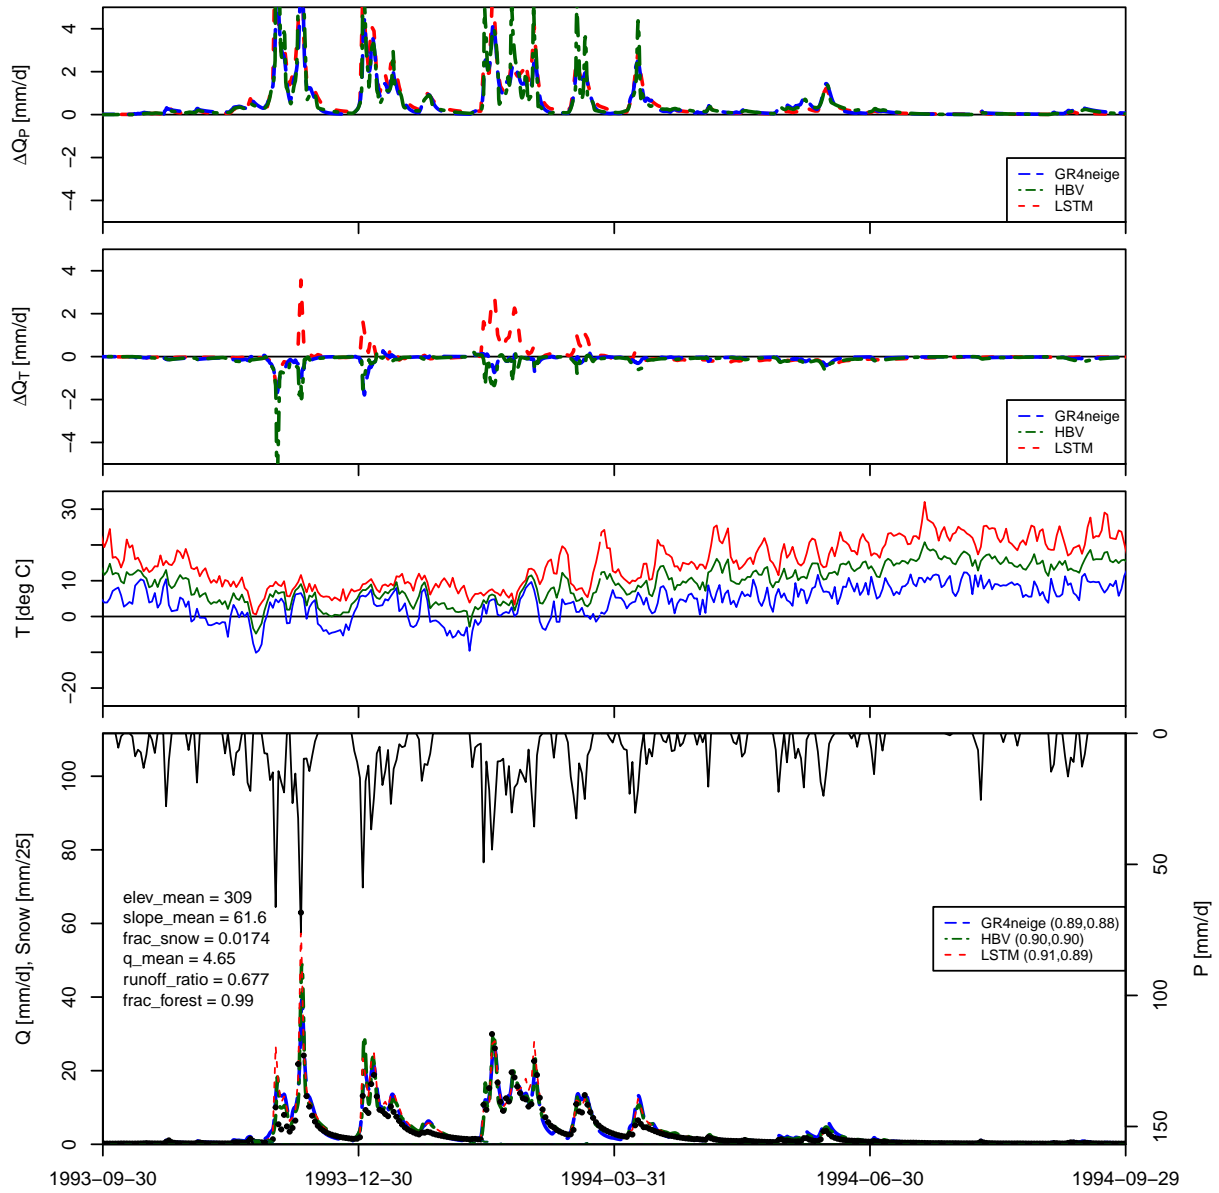

**Figure SL13.** Results for basin 12013500, Oct. 1993 - Sept. 1994 (part of calibration). See Fig. 3 for an explanation of the plot panels.

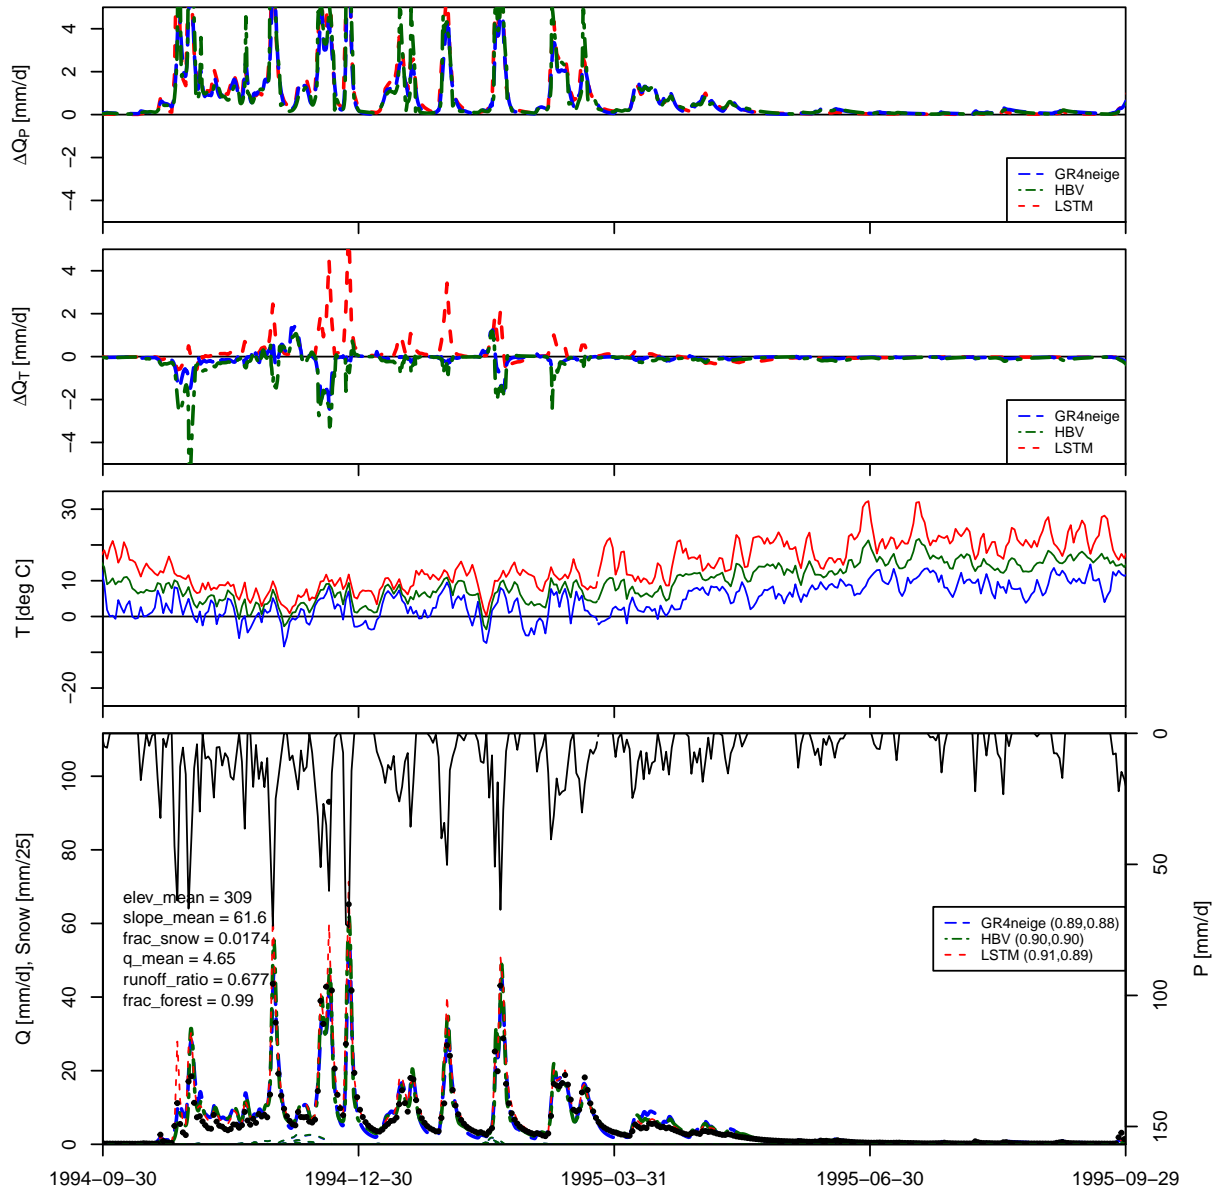

**Figure SL14.** Results for basin 12013500, Oct. 1994 - Sept. 1995 (part of calibration). See Fig. 3 for an explanation of the plot panels.

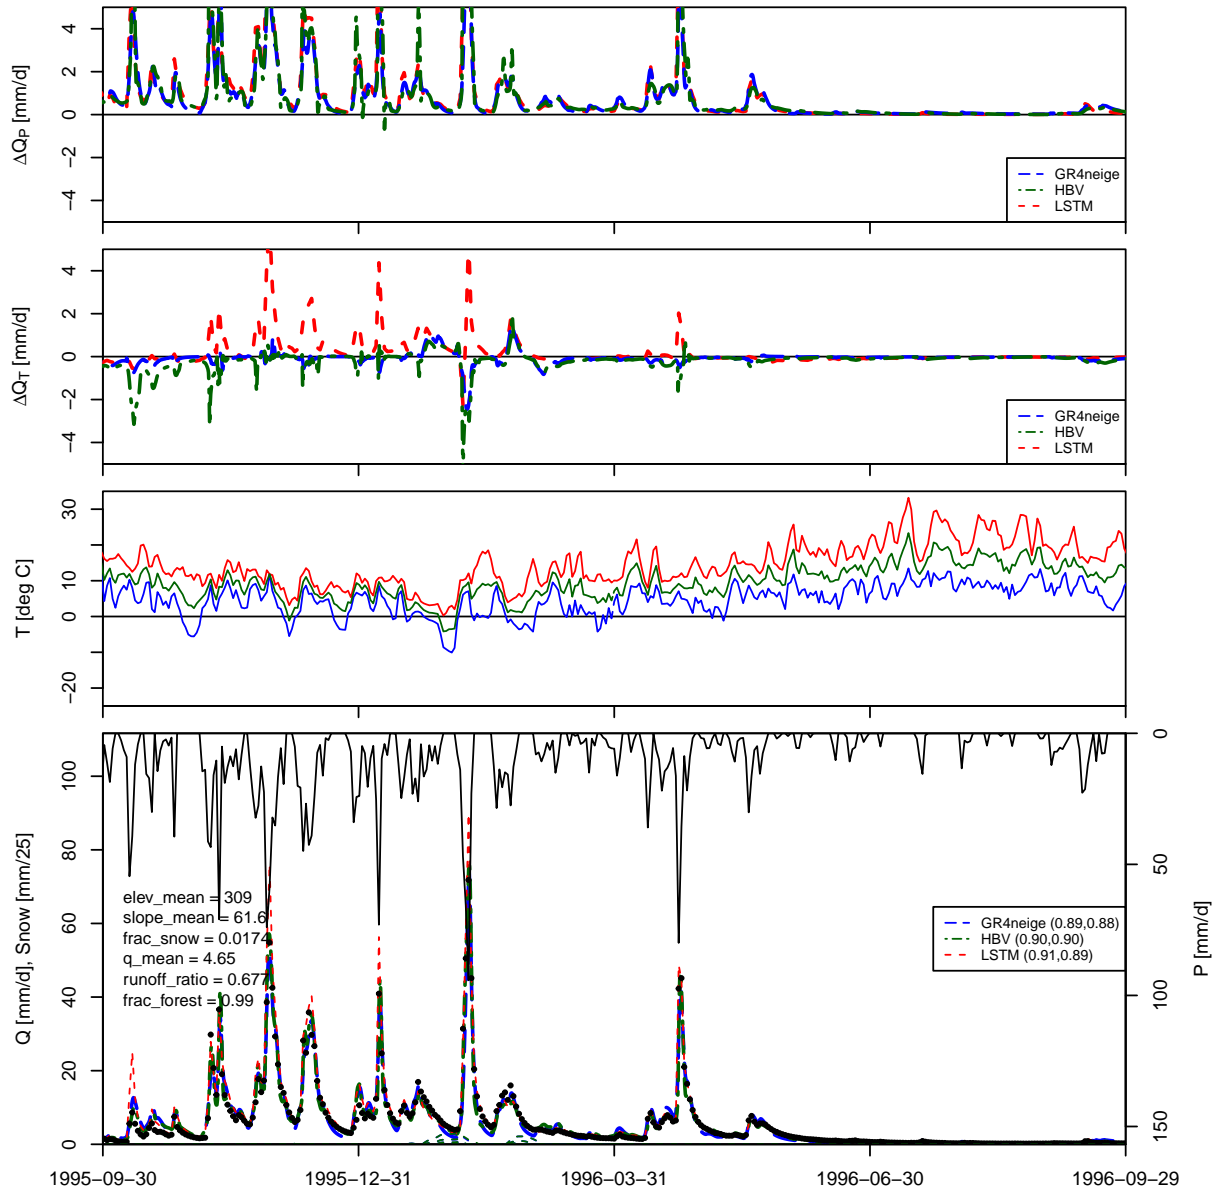

**Figure SL15.** Results for basin 12013500, Oct. 1995 - Sept. 1996 (part of validation). See Fig. 3 for an explanation of the plot panels.

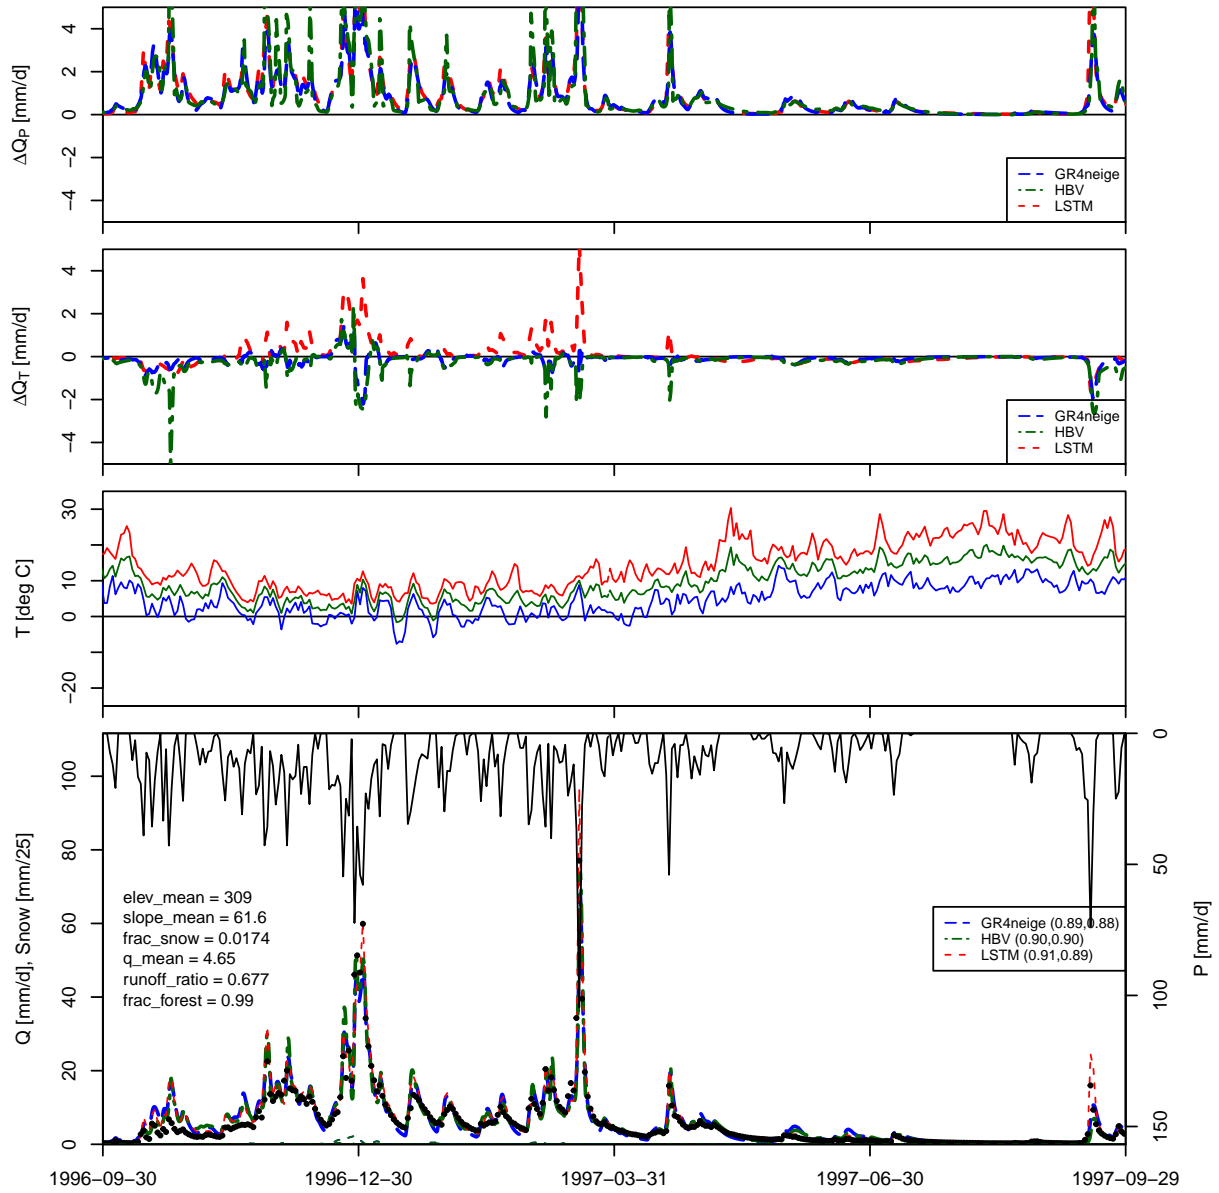

**Figure SL16.** Results for basin 12013500, Oct. 1996 - Sept. 1997 (part of validation). See Fig. 3 for an explanation of the plot panels.

## **Very High Altitude (Cold) Basins**

770 This section provides examples of the modelled response of very high altitude cold basins in addition to the one discussed in section 3.2.2. See section 3.2.2 for explanations.

The Figures SI.17 to SI.20 show the results for the last two years of the calibration period and for the first two years of the validation period for the basin 09066000.

775 The Figures SI.21 to SI.24 show the results for the last two years of the calibration period and for the first two years of the validation period for the basin 07083000.

The Figures SI.25 to SI.28 show the results for the last two years of the calibration period and for the first two years of the validation period for the basin 06614800.

780

The Figures SI.29 to SI.32 show the results for the last two years of the calibration period and for the first two years of the validation period for the basin 09035800.

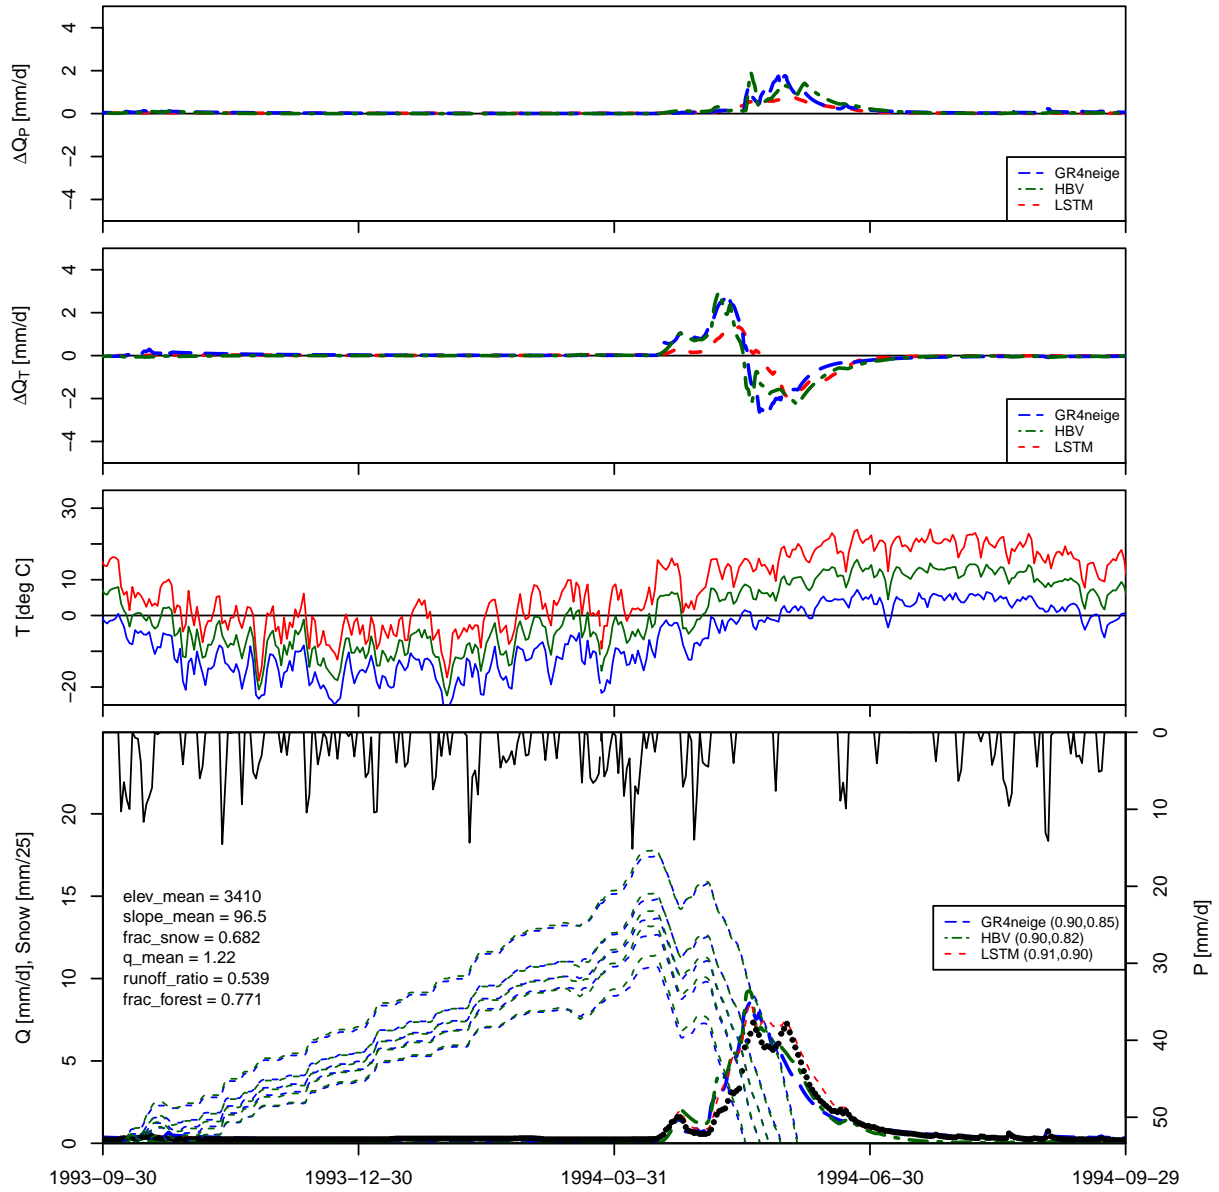

**Figure SL.17.** Results for basin 09066000, Oct. 1993 - Sept. 1994 (part of calibration). See Fig. 3 for an explanation of the plot panels.

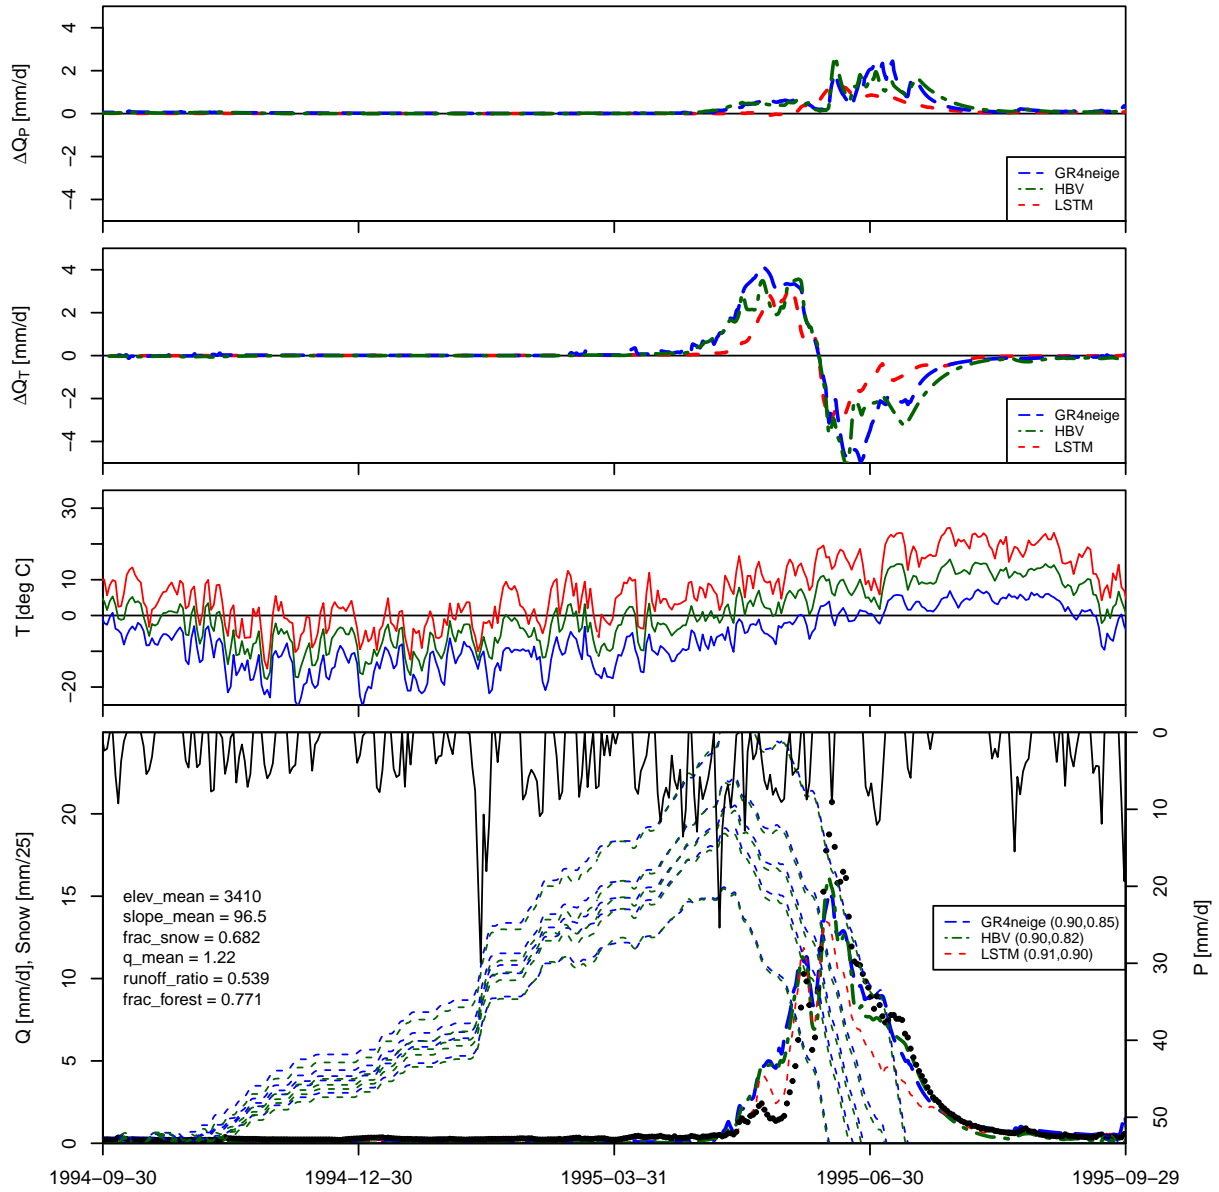

**Figure SL18.** Results for basin 09066000, Oct. 1994 - Sept. 1995 (part of calibration). See Fig. 3 for an explanation of the plot panels.

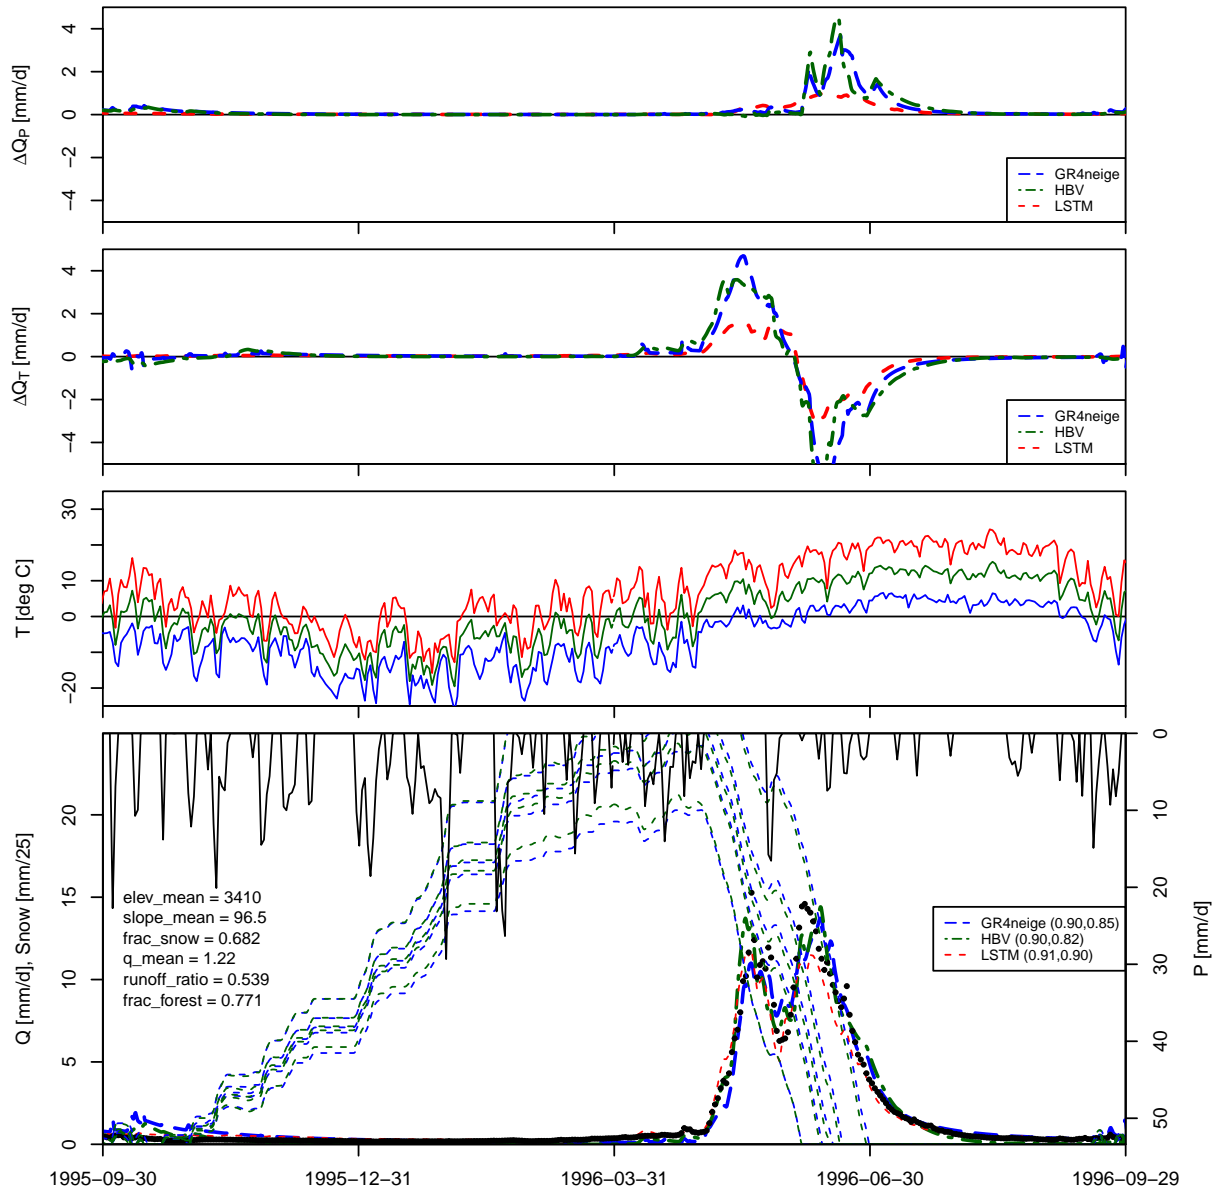

**Figure SL19.** Results for basin 09066000, Oct. 1995 - Sept. 1996 (part of validation). See Fig. 3 for an explanation of the plot panels.

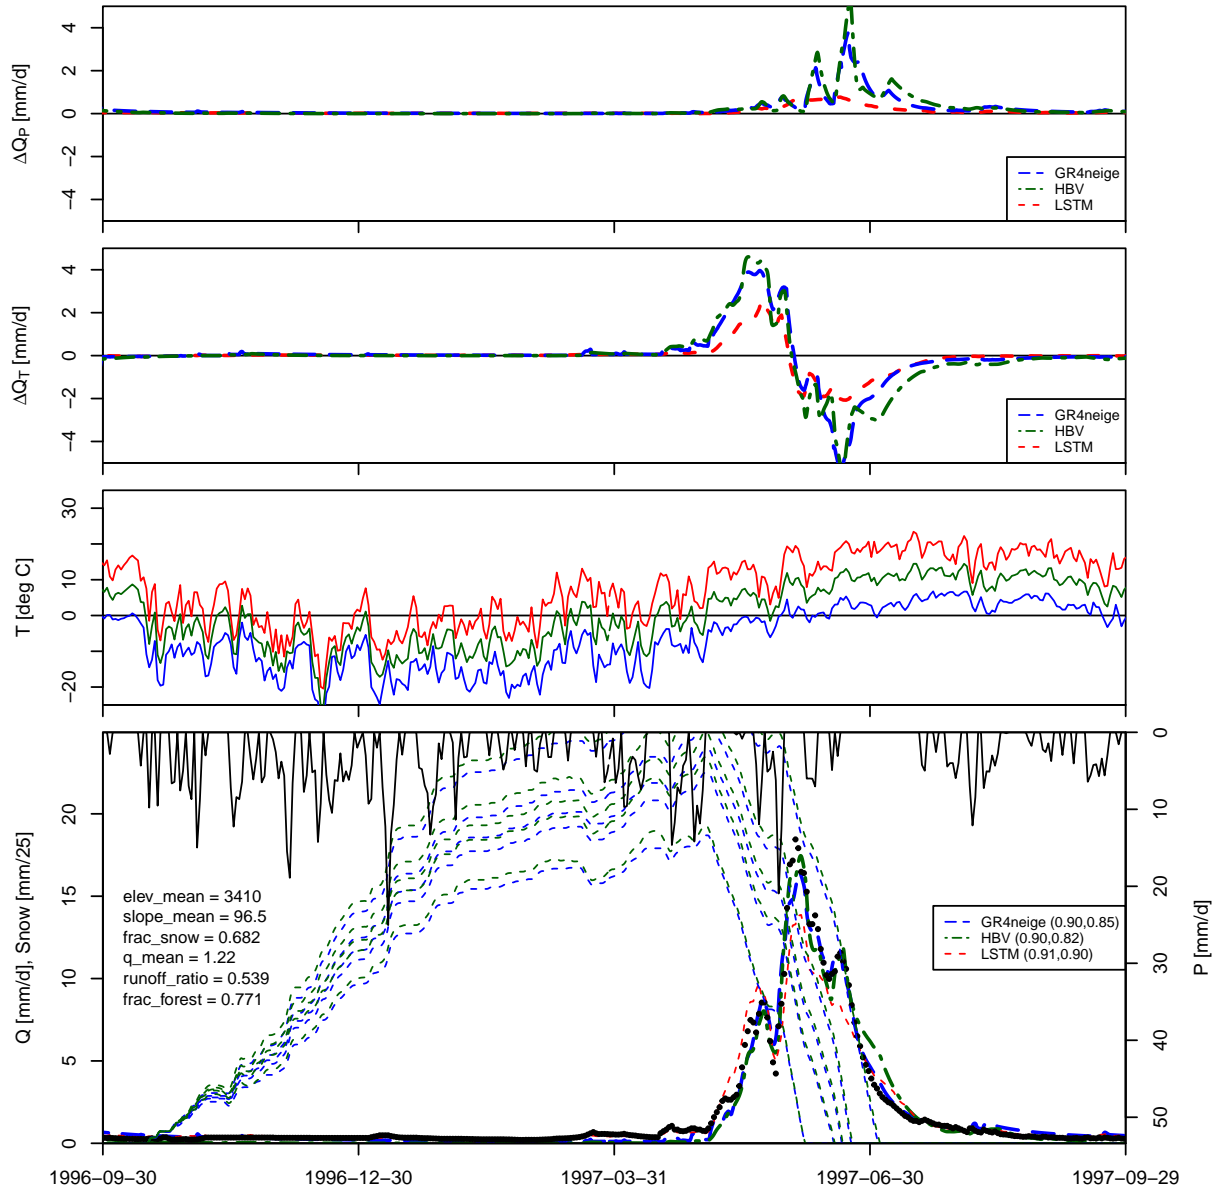

**Figure SL20.** Results for basin 09066000, Oct. 1996 - Sept. 1997 (part of validation). See Fig. 3 for an explanation of the plot panels.

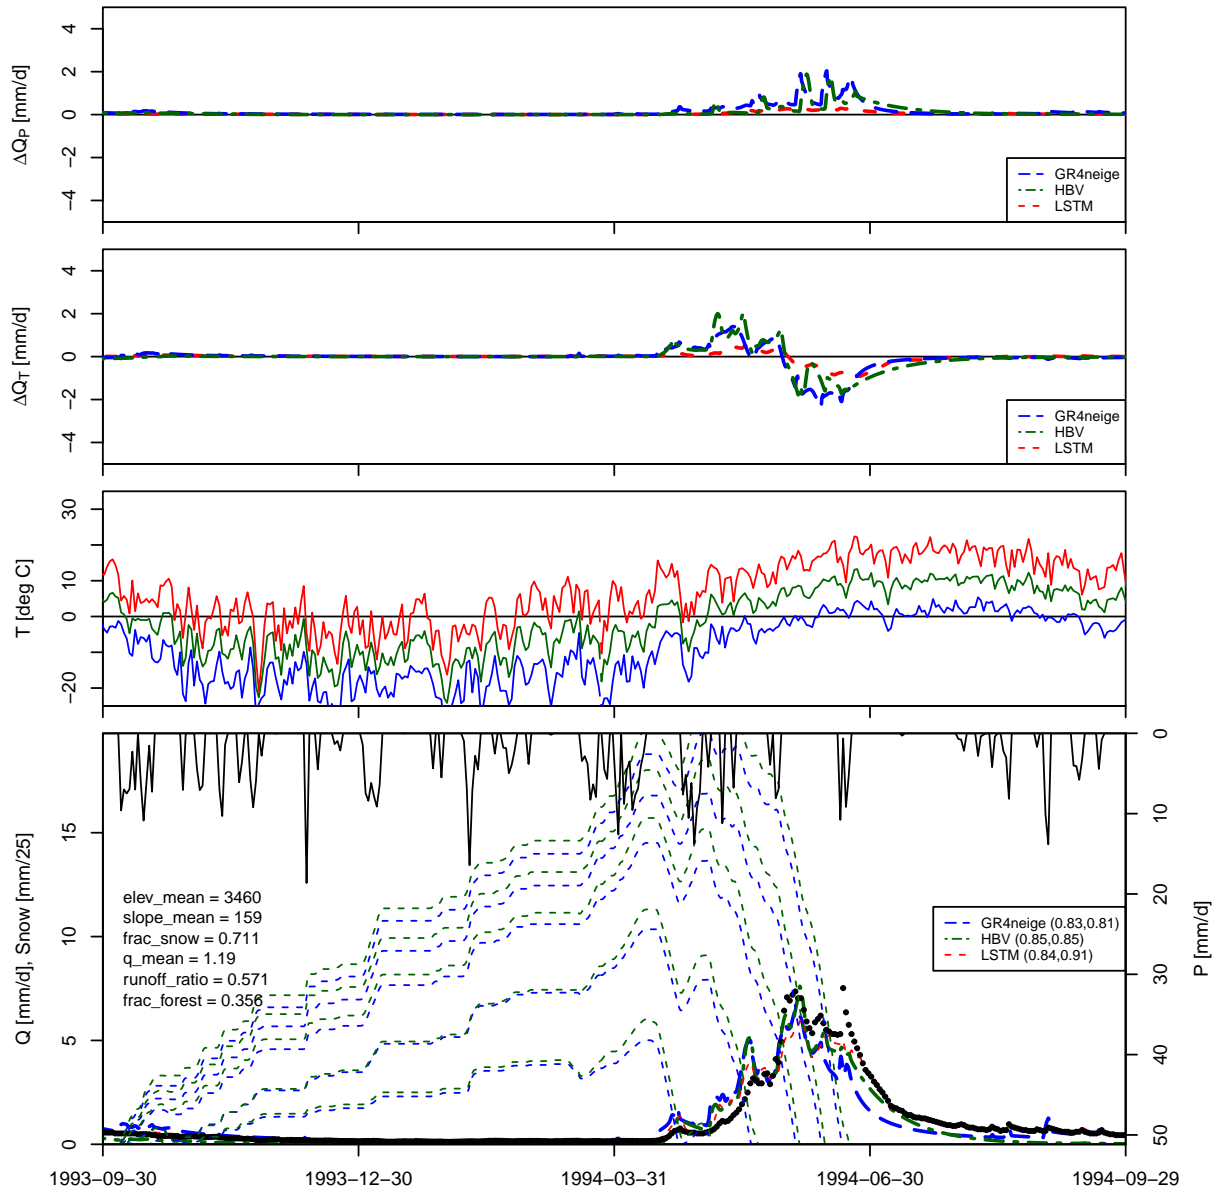

**Figure SL21.** Results for basin 07083000, Oct. 1993 - Sept. 1994 (part of calibration). See Fig. 3 for an explanation of the plot panels.

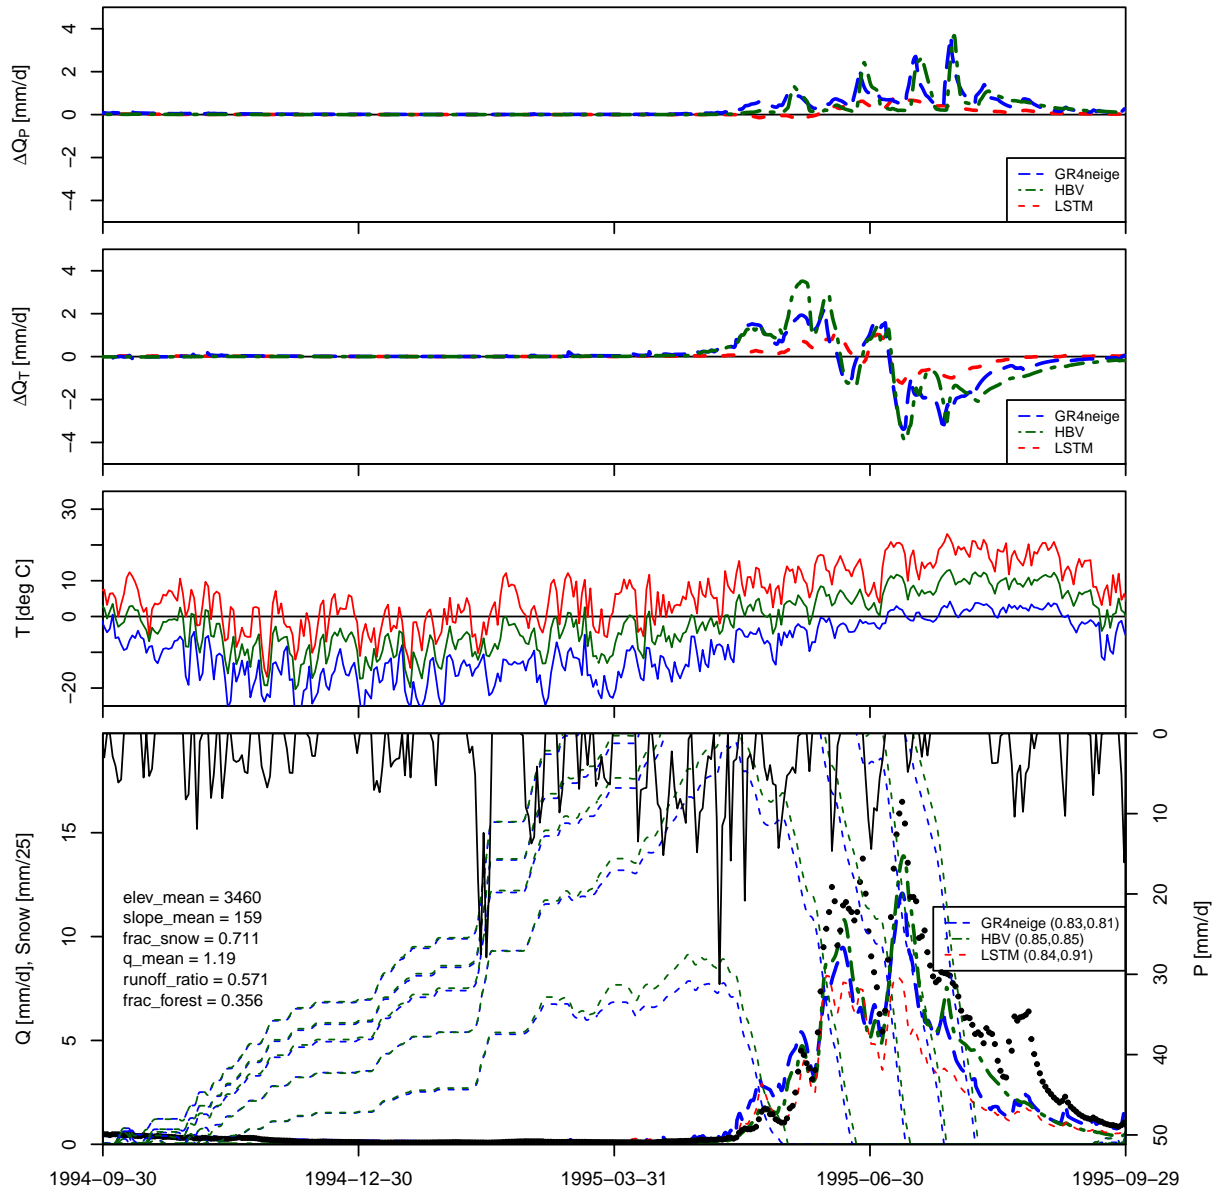

**Figure SI.22.** Results for basin 07083000, Oct. 1994 - Sept. 1995 (part of calibration). See Fig. 3 for an explanation of the plot panels.

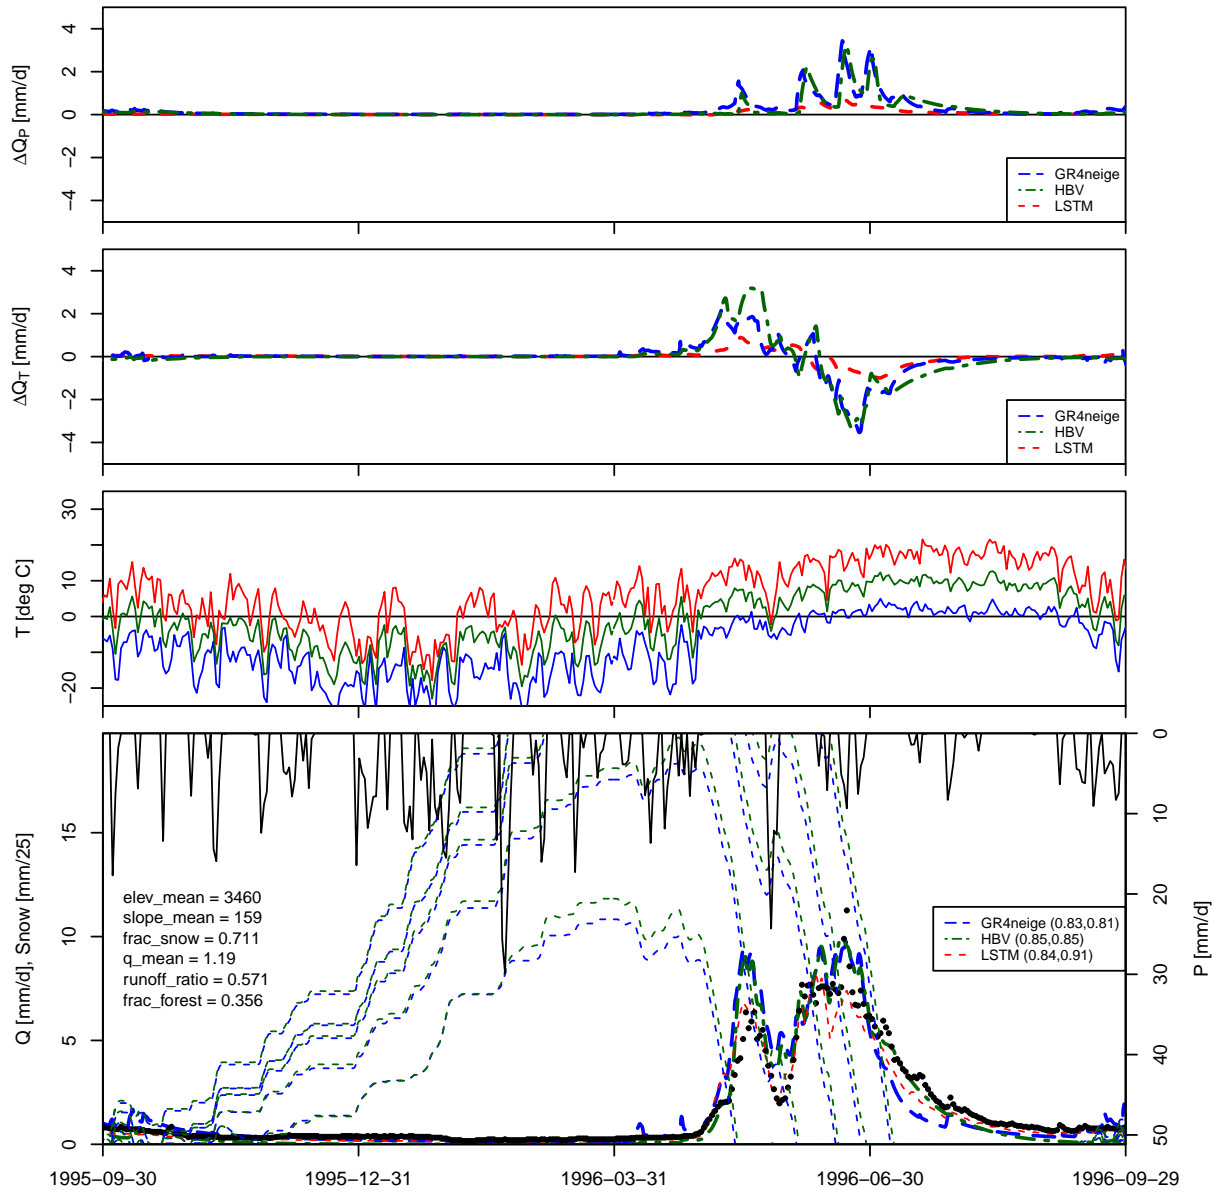

**Figure SI.23.** Results for basin 07083000, Oct. 1995 - Sept. 1996 (part of validation). See Fig. 3 for an explanation of the plot panels.

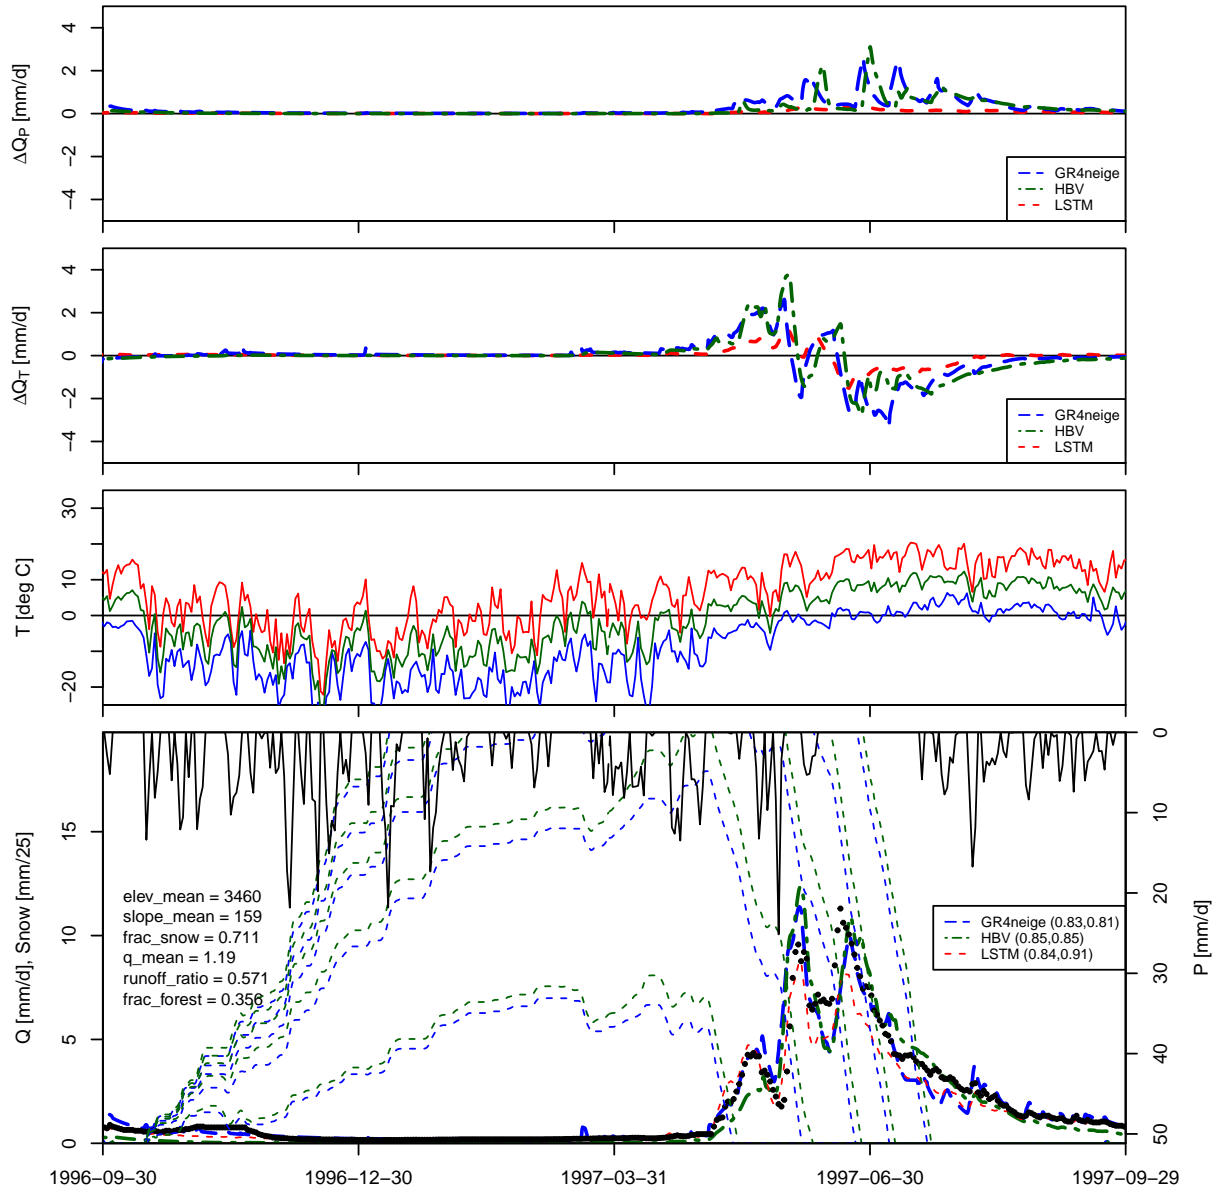

**Figure SI.24.** Results for basin 07083000, Oct. 1996 - Sept. 1997 (part of validation). See Fig. 3 for an explanation of the plot panels.

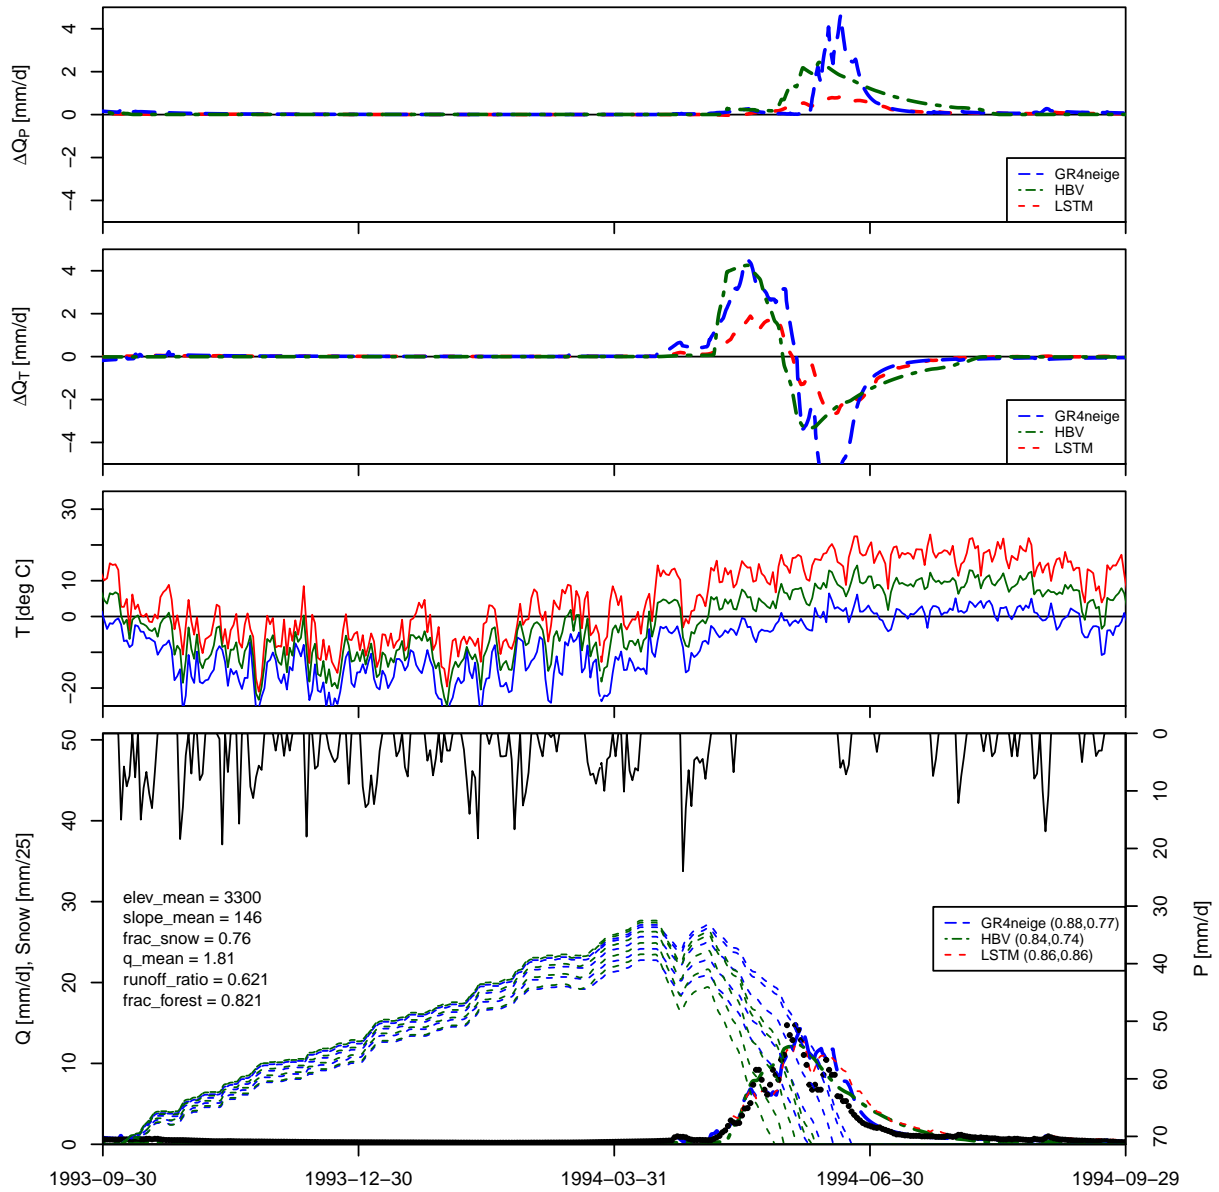

**Figure SI.25.** Results for basin 06614800, Oct. 1993 - Sept. 1994 (part of calibration). See Fig. 3 for an explanation of the plot panels.

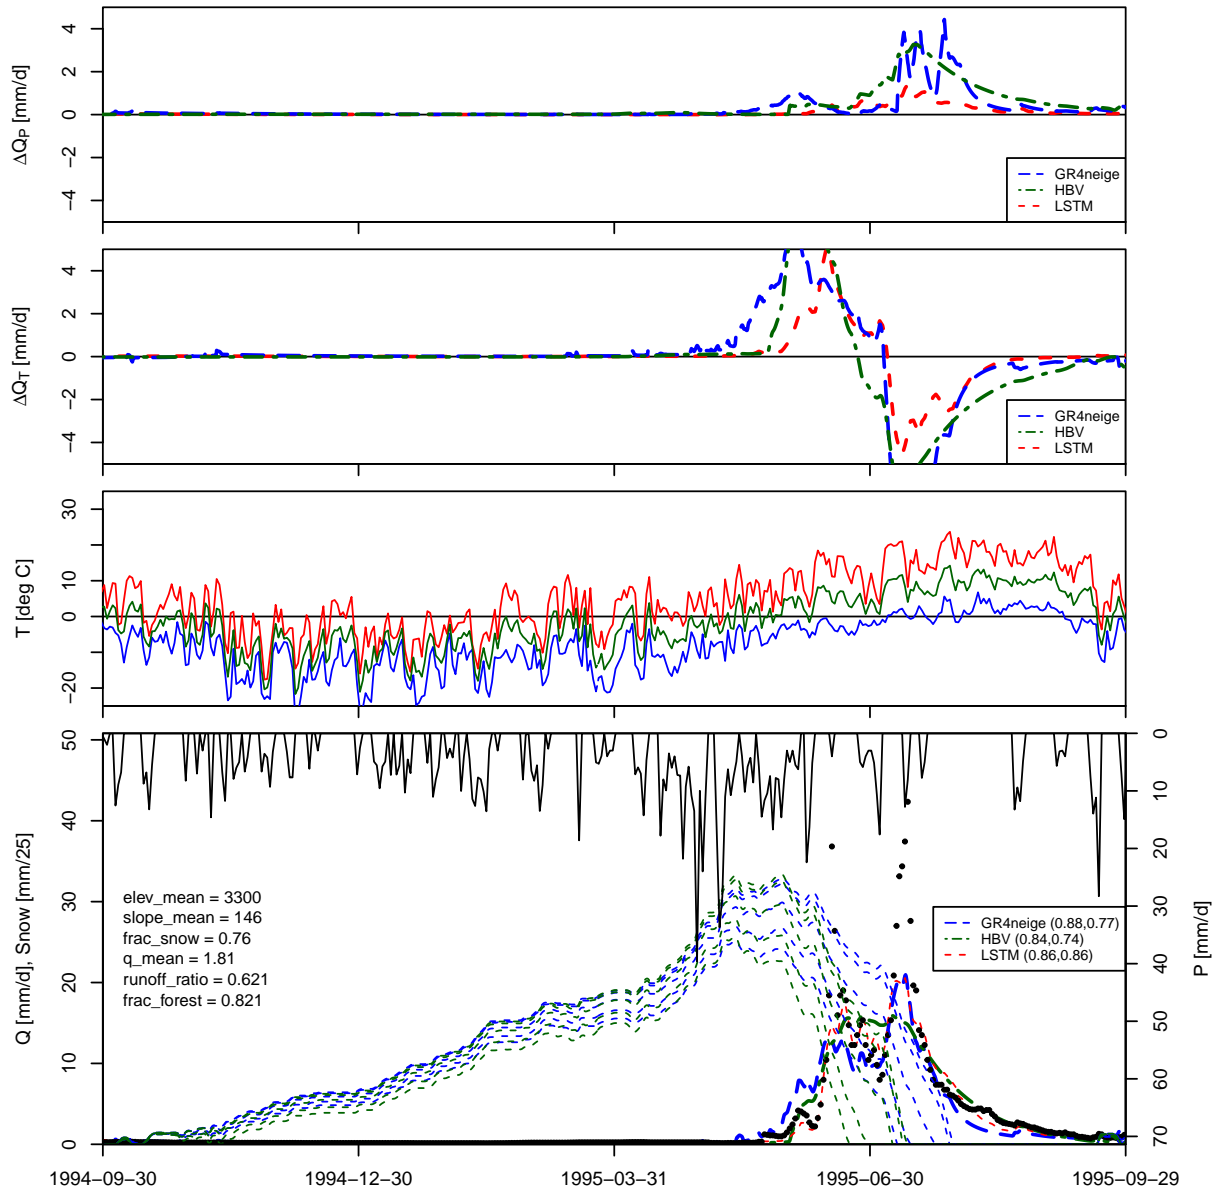

**Figure SL26.** Results for basin 06614800, Oct. 1994 - Sept. 1995 (part of calibration). See Fig. 3 for an explanation of the plot panels.

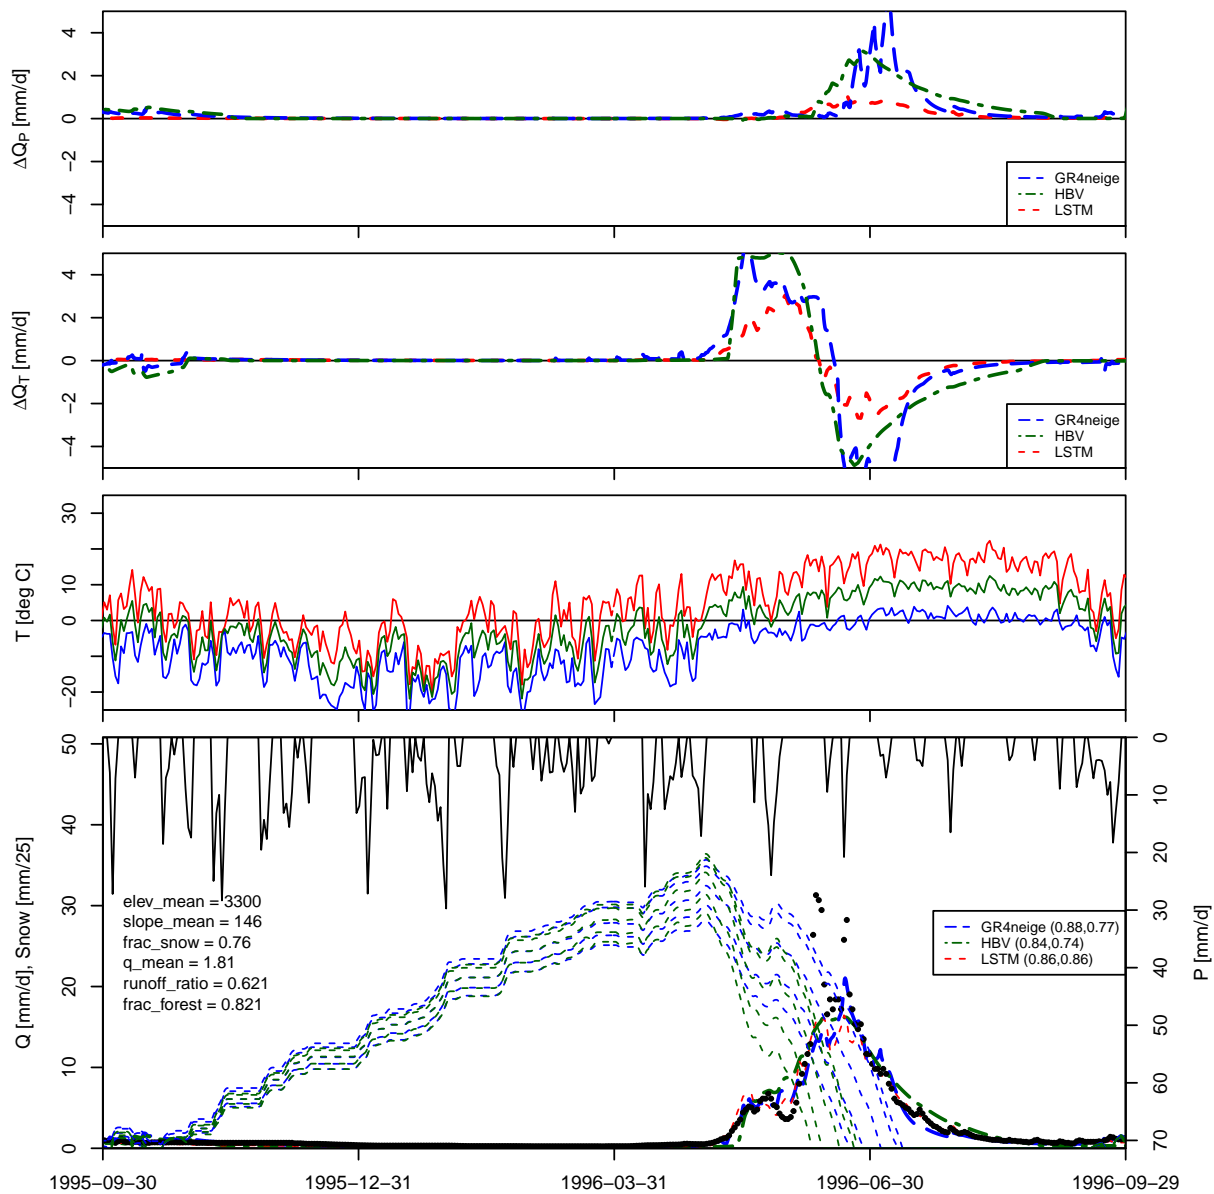

**Figure SL27.** Results for basin 06614800, Oct. 1995 - Sept. 1996 (part of validation). See Fig. 3 for an explanation of the plot panels.

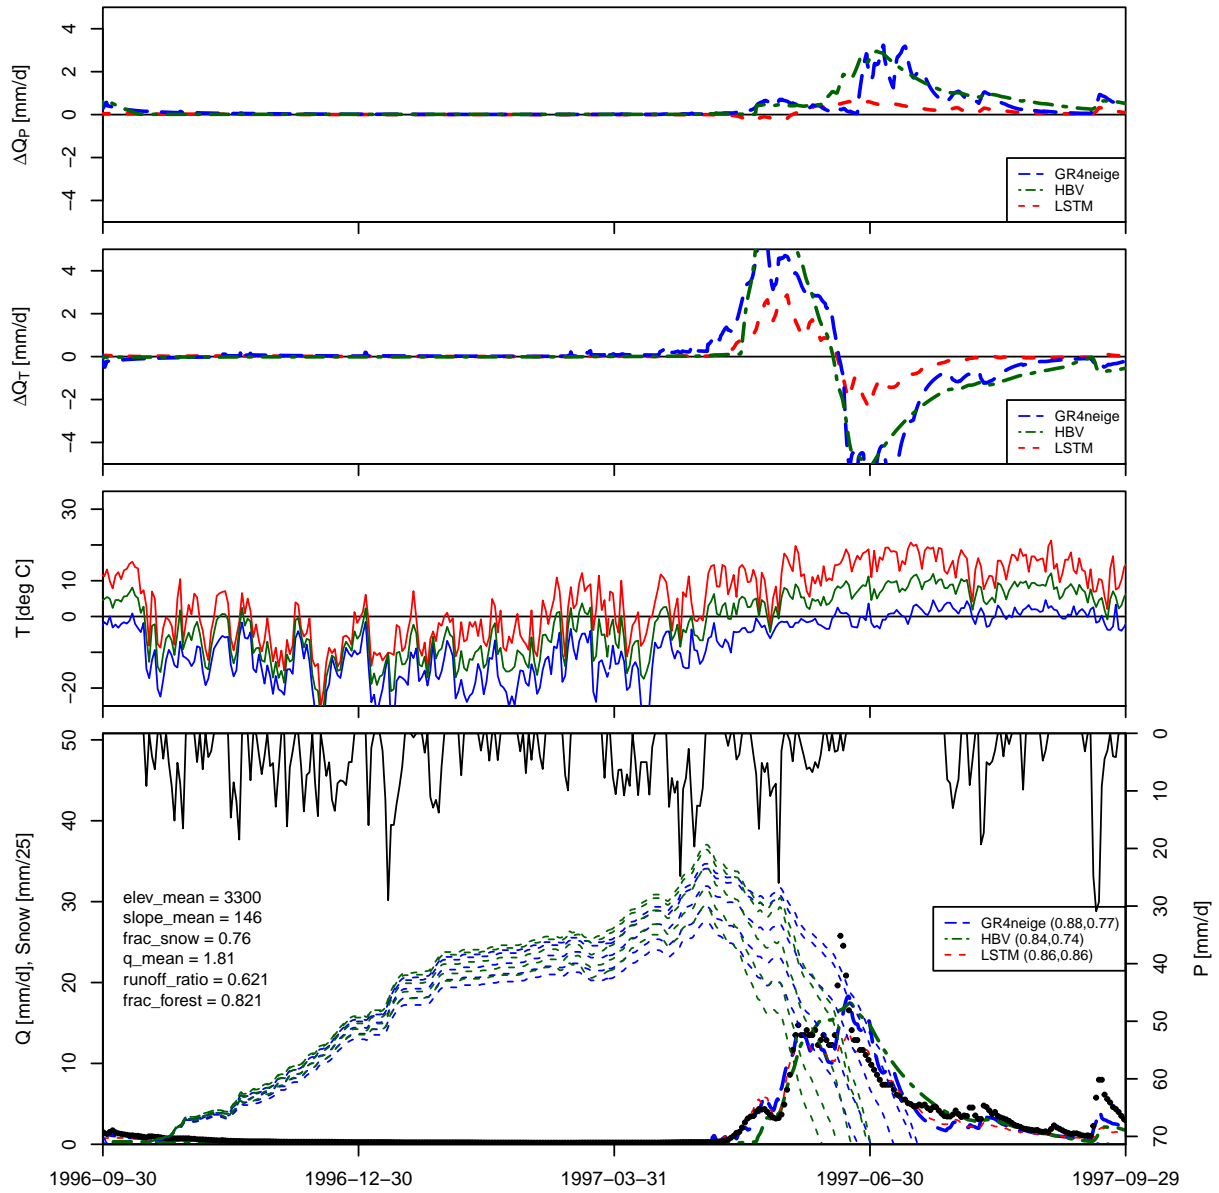

**Figure SL28.** Results for basin 06614800, Oct. 1996 - Sept. 1997 (part of validation). See Fig. 3 for an explanation of the plot panels.

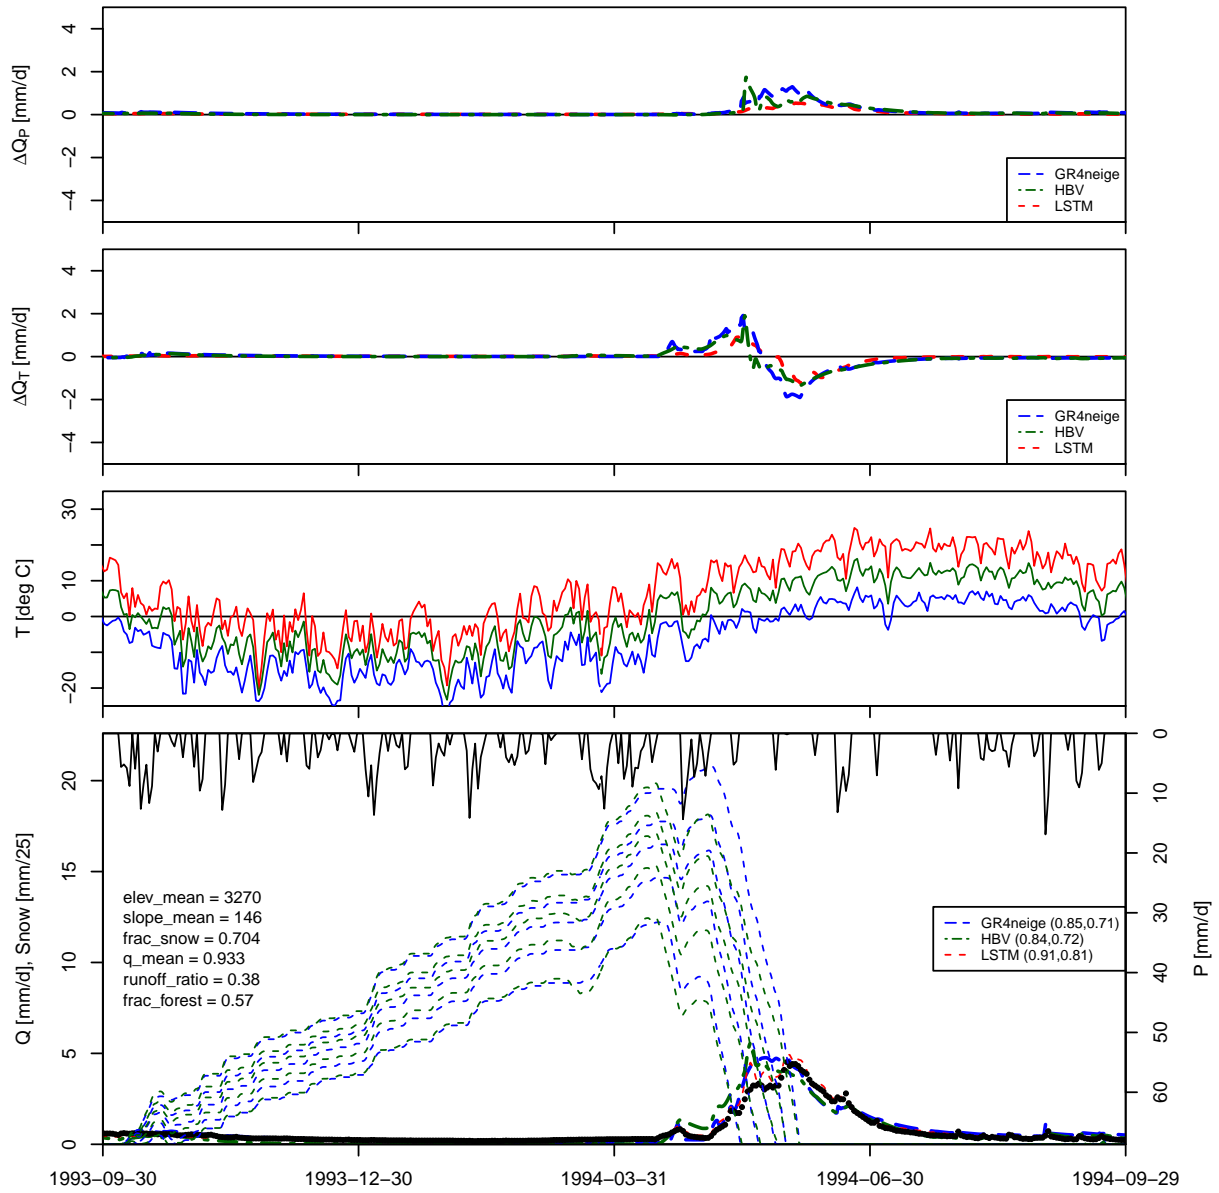

**Figure SI.29.** Results for basin 09035800, Oct. 1993 - Sept. 1994 (part of calibration). See Fig. 3 for an explanation of the plot panels.

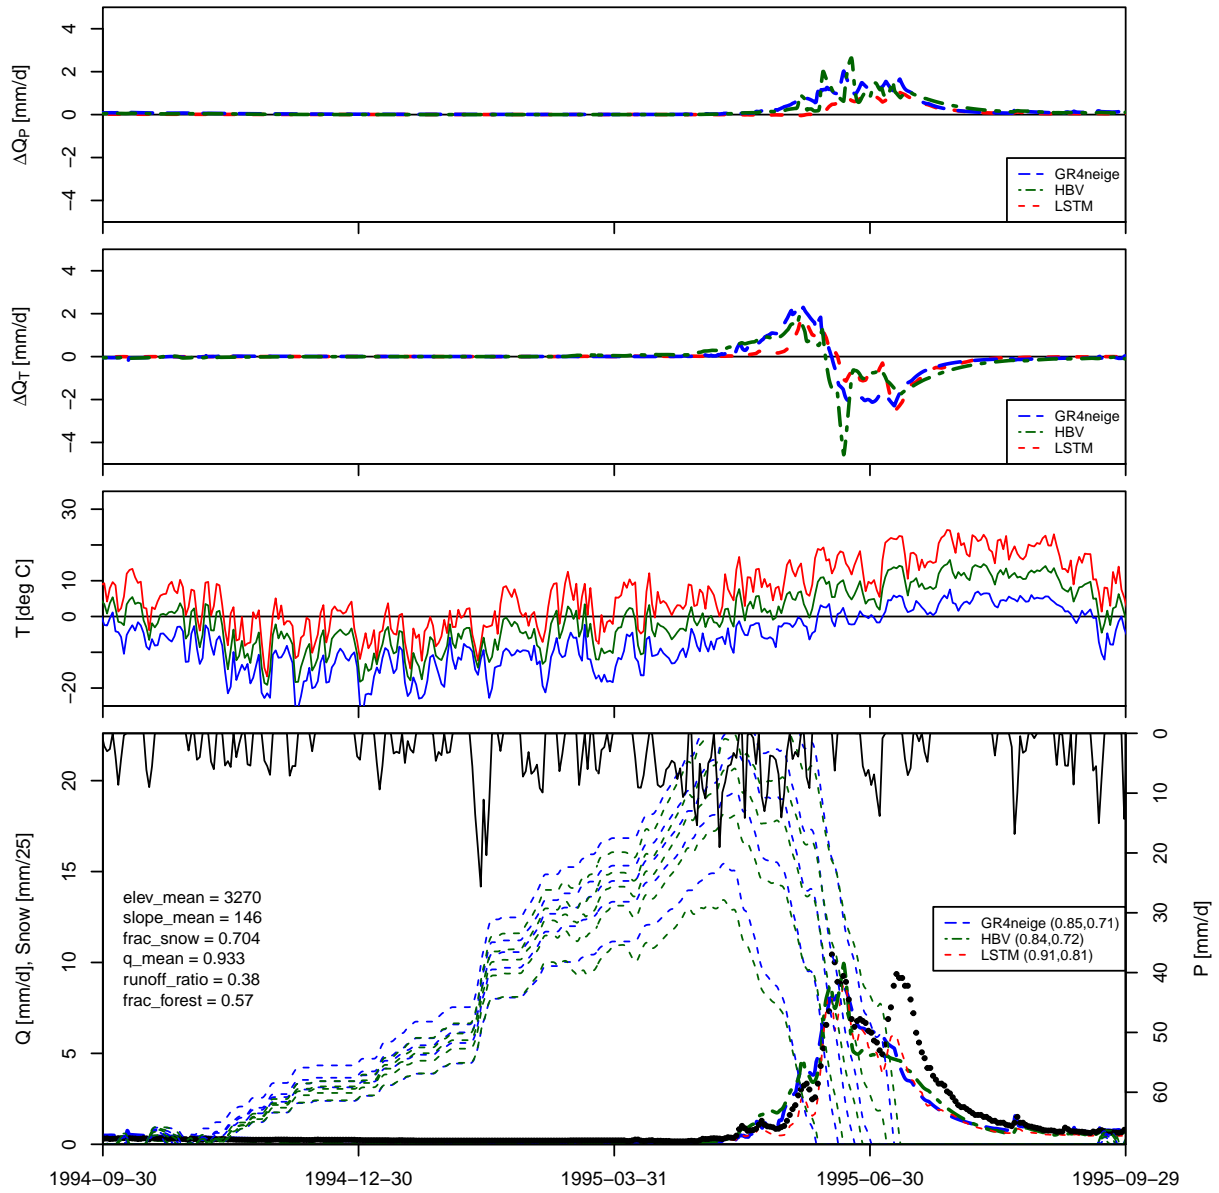

**Figure SL30.** Results for basin 09035800, Oct. 1994 - Sept. 1995 (part of calibration). See Fig. 3 for an explanation of the plot panels.

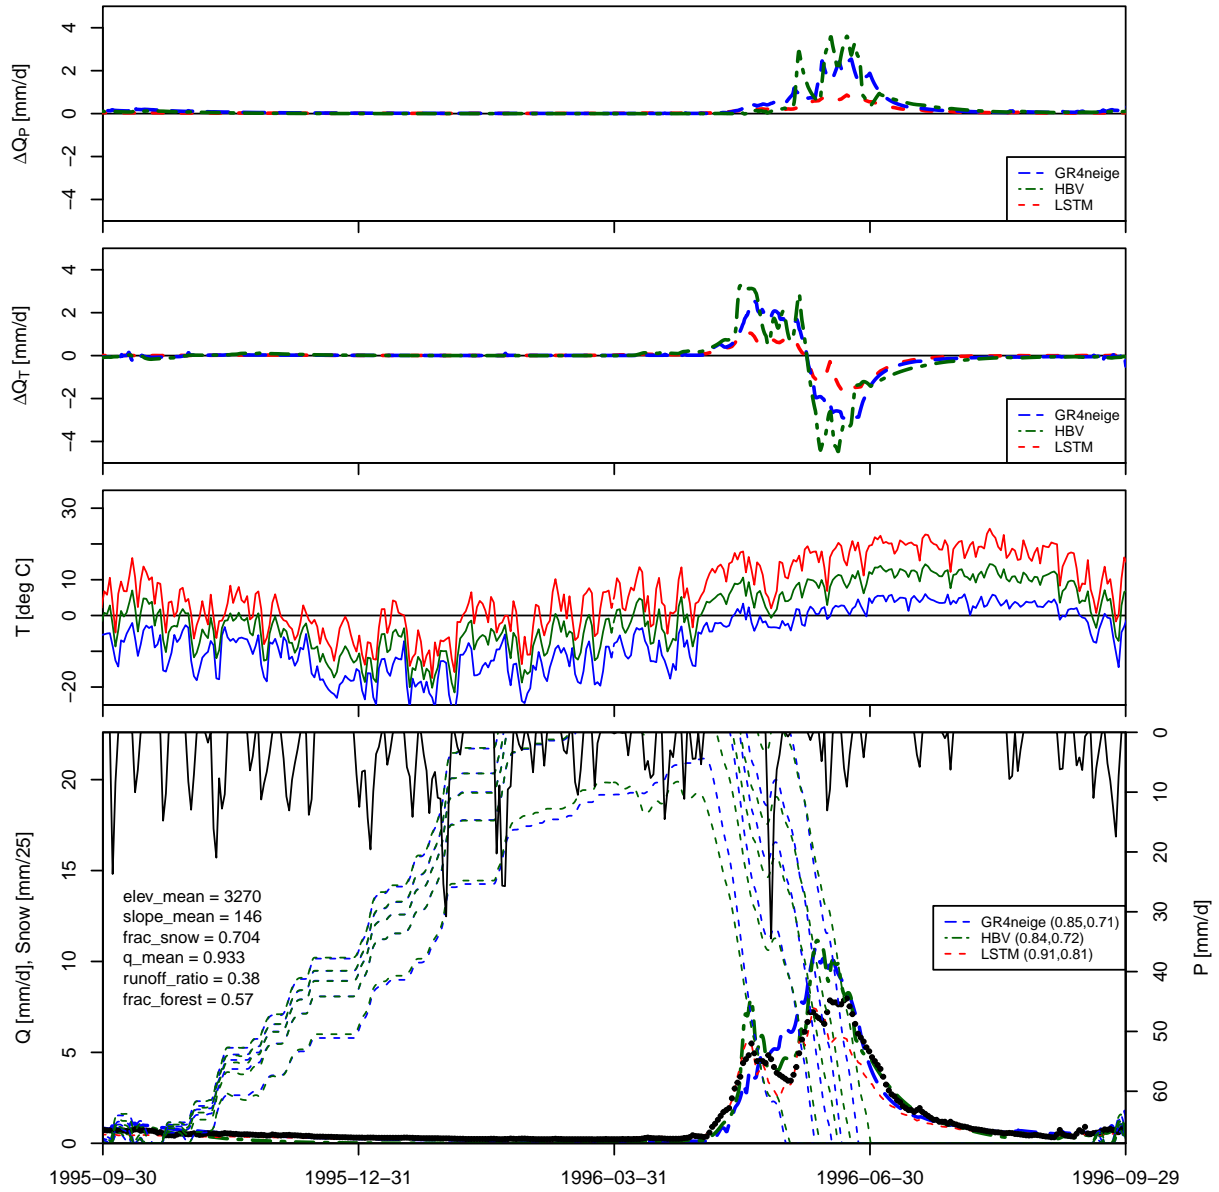

**Figure SL31.** Results for basin 09035800, Oct. 1995 - Sept. 1996 (part of validation). See Fig. 3 for an explanation of the plot panels.

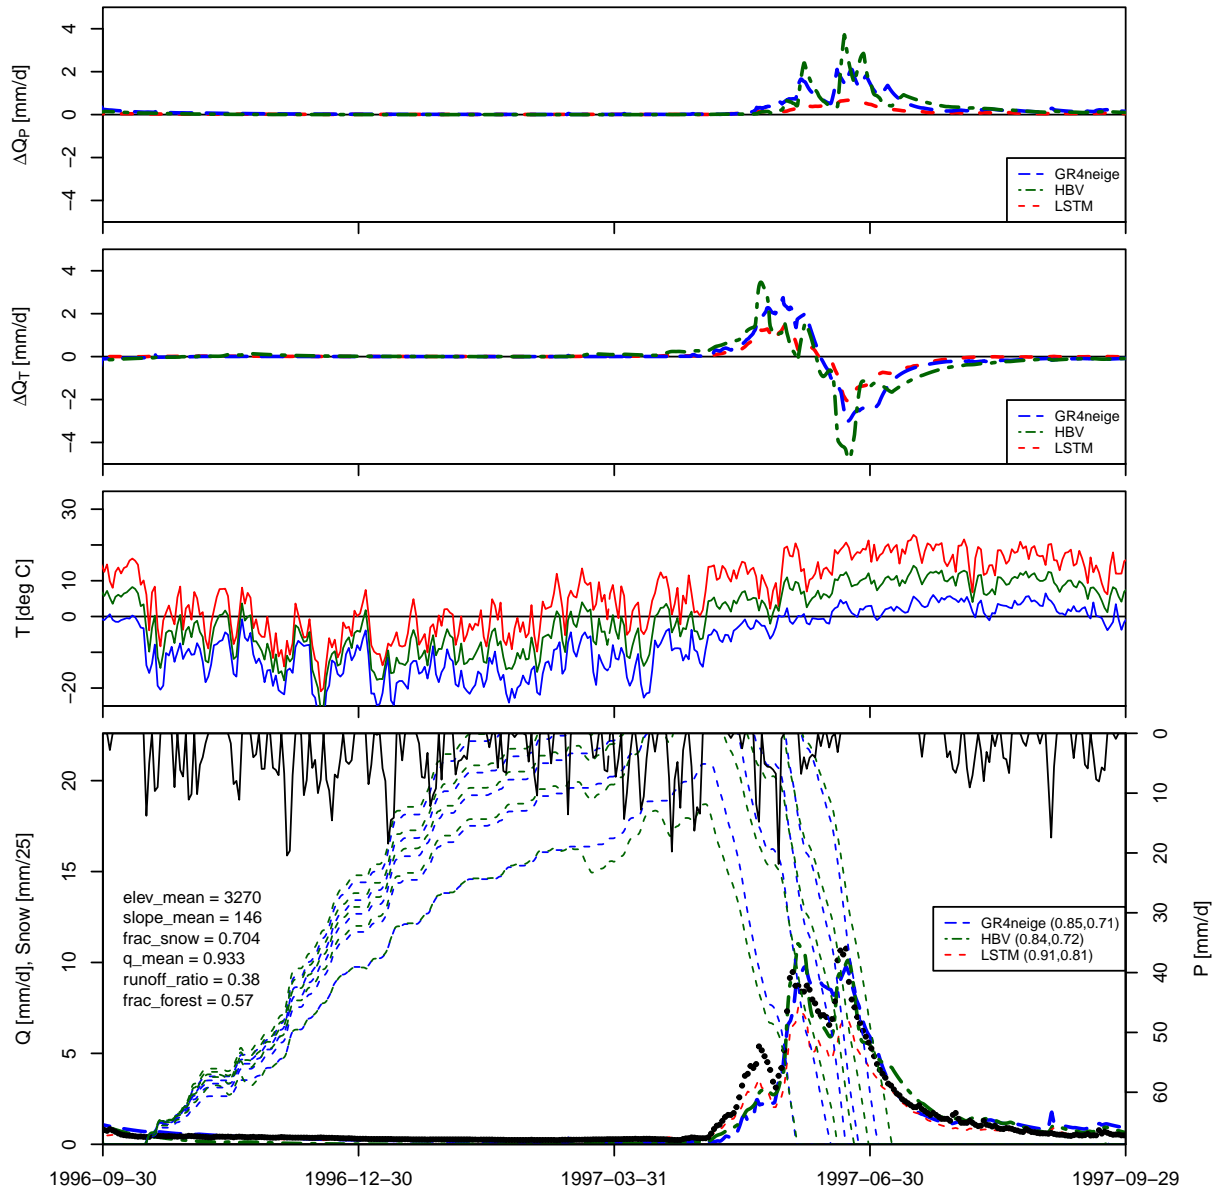

**Figure SL32.** Results for basin 09035800, Oct. 1996 - Sept. 1997 (part of validation). See Fig. 3 for an explanation of the plot panels.

## **Intermediate Altitude Basins**

785 This section provides examples of the modelled response of intermediate altitude basins in addition to the one discussed in section 3.2.3. See section 3.2.3 for explanations.

The Figures SI.33 to SI.36 show the results for the last two years of the calibration period and for the first two years of the validation period for the basin 12143600.

790

The Figures SI.37 to SI.40 show the results for the last two years of the calibration period and for the first two years of the validation period for the basin 14216500.

795 The Figures SI.41 to SI.44 show the results for the last two years of the calibration period and for the first two years of the validation period for the basin 12114500.

The Figures SI.45 to SI.48 show the results for the last two years of the calibration period and for the first two years of the validation period for the basin 14154500.

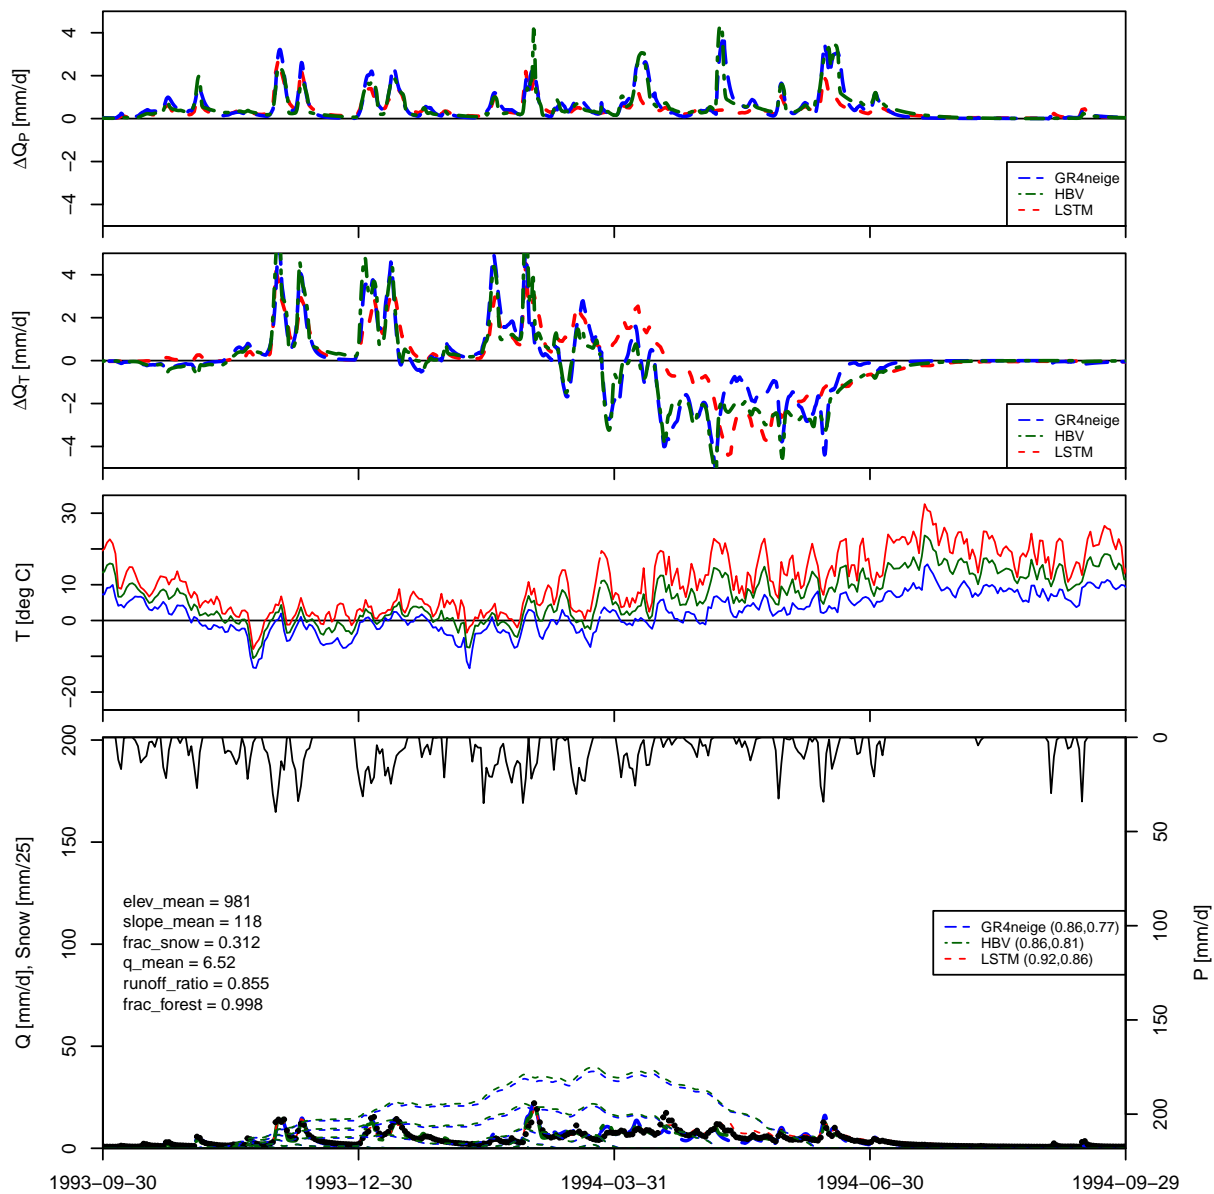

**Figure SI.33.** Results for basin 12143600, Oct. 1993 - Sept. 1994 (part of calibration). See Fig. 3 for an explanation of the plot panels.

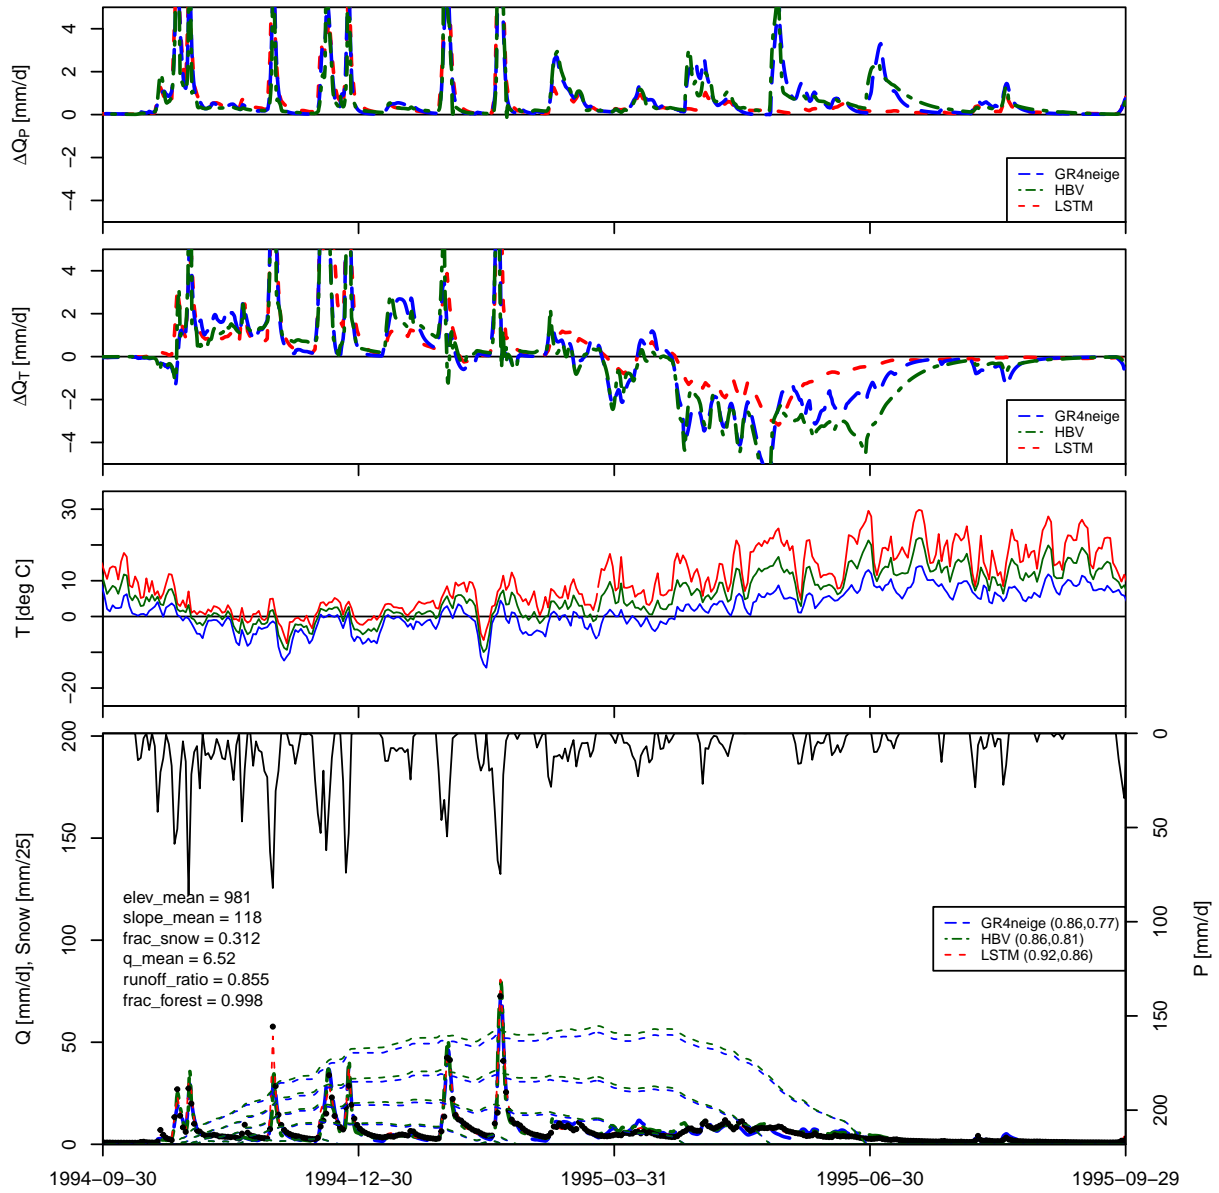

**Figure SI.34.** Results for basin 12143600, Oct. 1994 - Sept. 1995 (part of calibration). See Fig. 3 for an explanation of the plot panels.

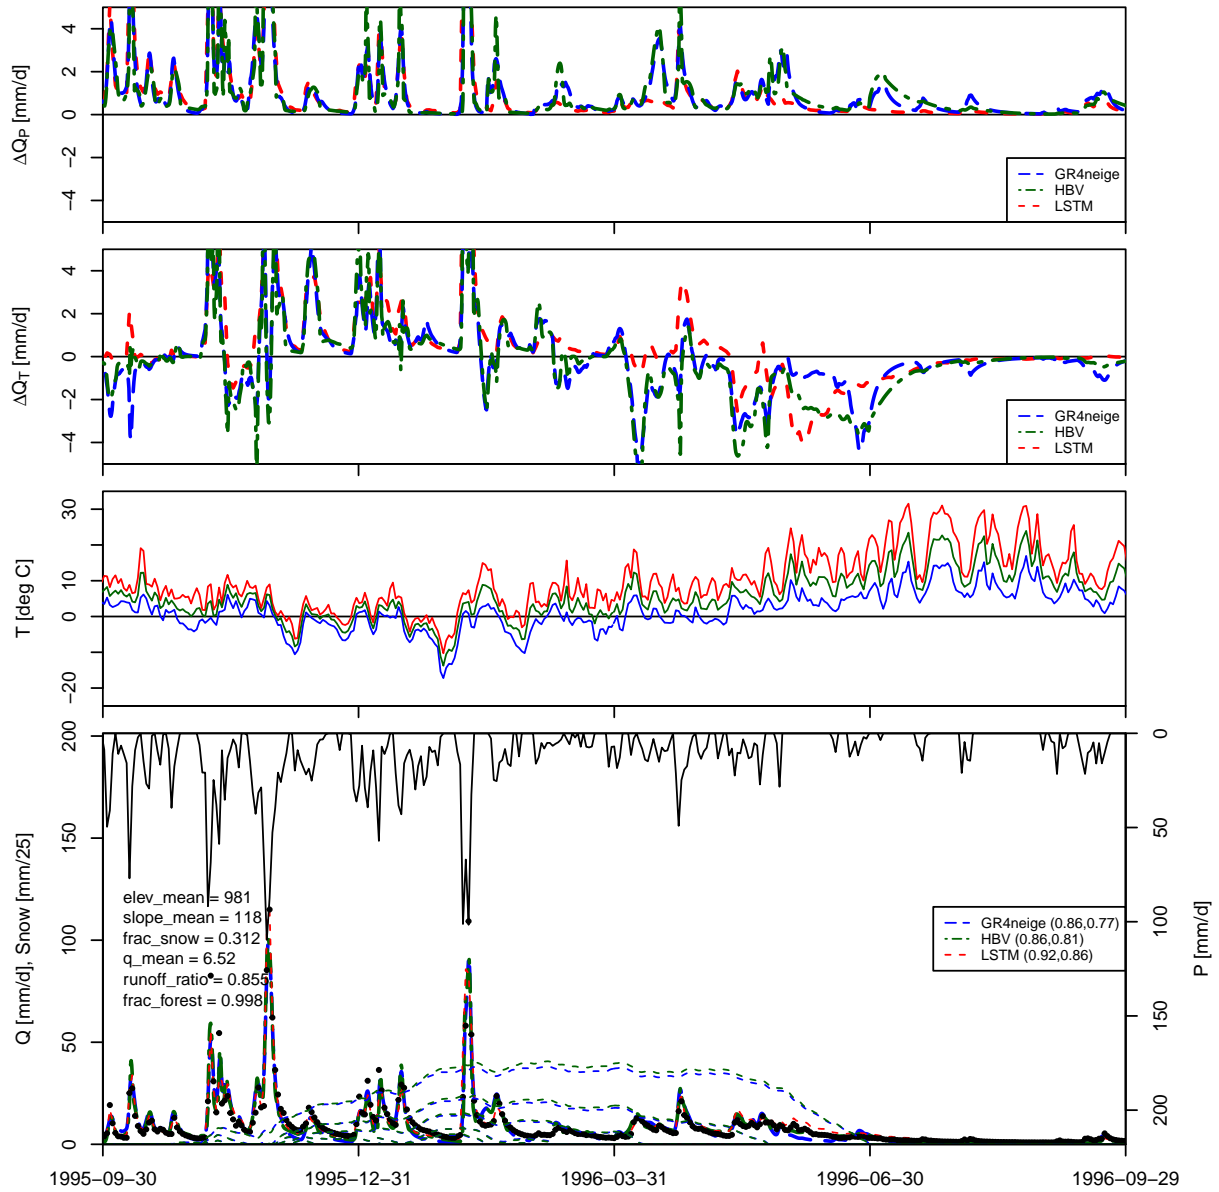

**Figure SI.35.** Results for basin 12143600, Oct. 1995 - Sept. 1996 (part of validation). See Fig. 3 for an explanation of the plot panels.

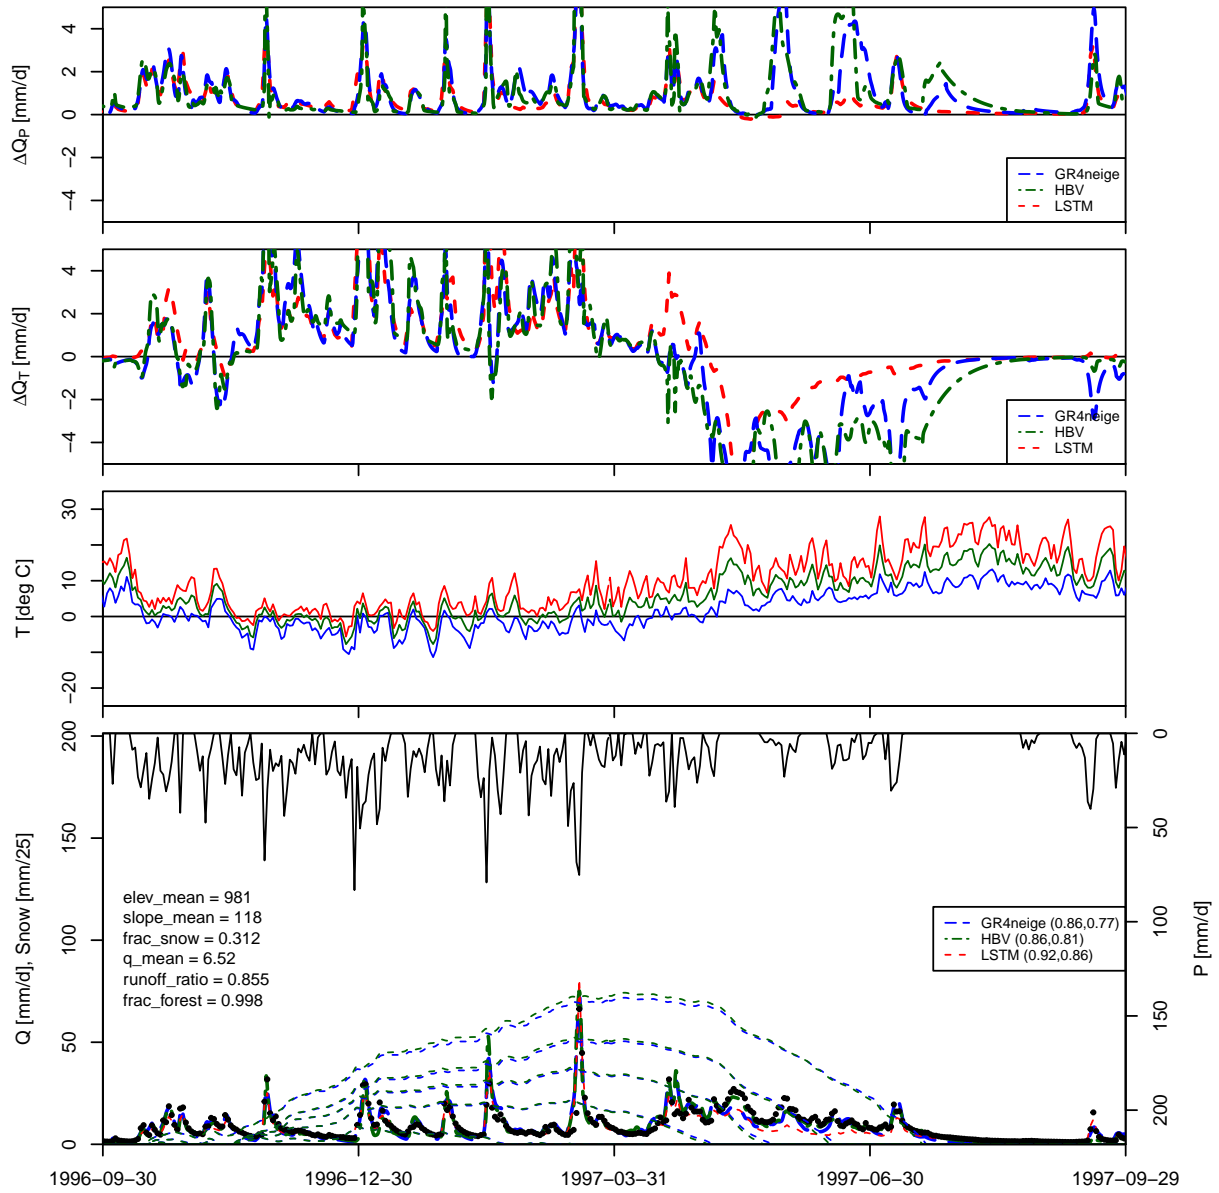

**Figure SL36.** Results for basin 12143600, Oct. 1996 - Sept. 1997 (part of validation). See Fig. 3 for an explanation of the plot panels.

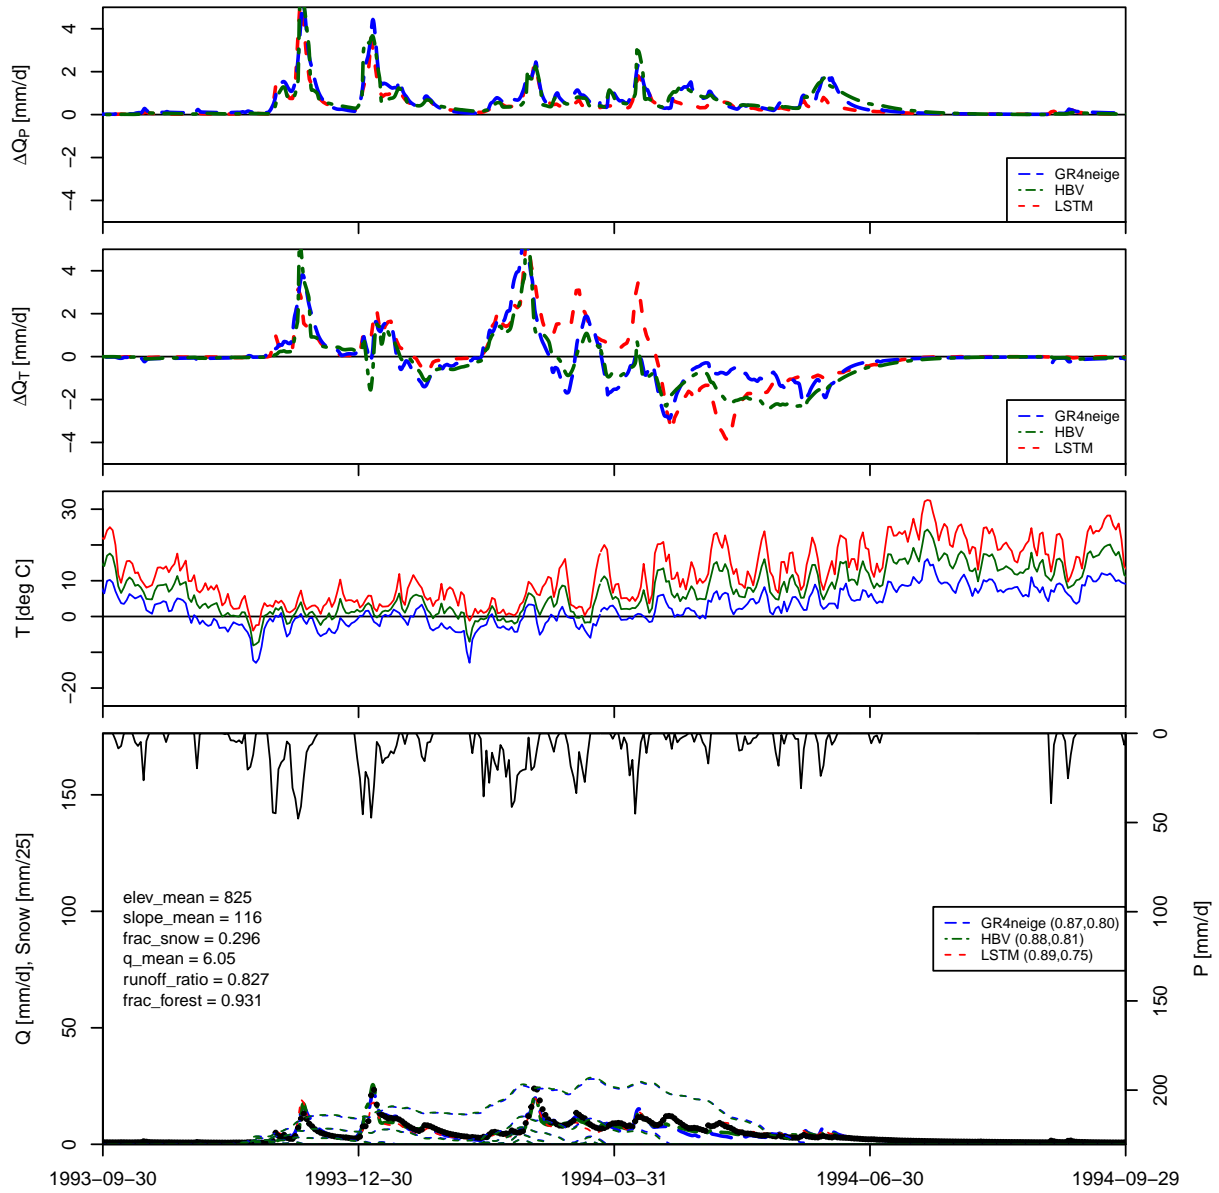

**Figure SI.37.** Results for basin 14216500, Oct. 1993 - Sept. 1994 (part of calibration). See Fig. 3 for an explanation of the plot panels.

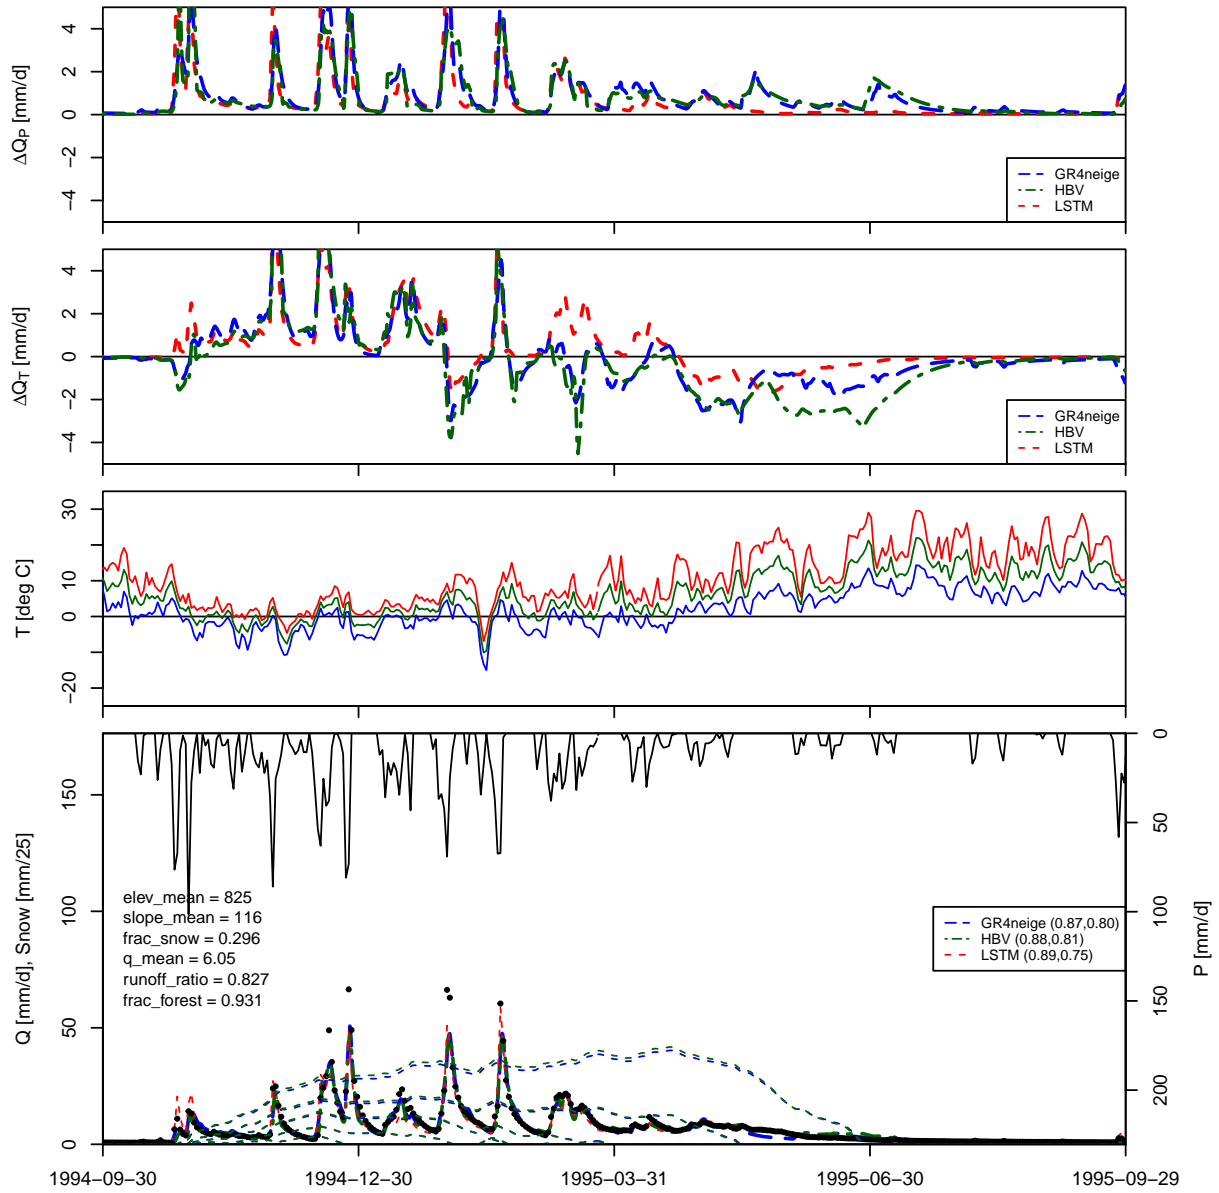

**Figure SL38.** Results for basin 14216500, Oct. 1994 - Sept. 1995 (part of calibration). See Fig. 3 for an explanation of the plot panels.

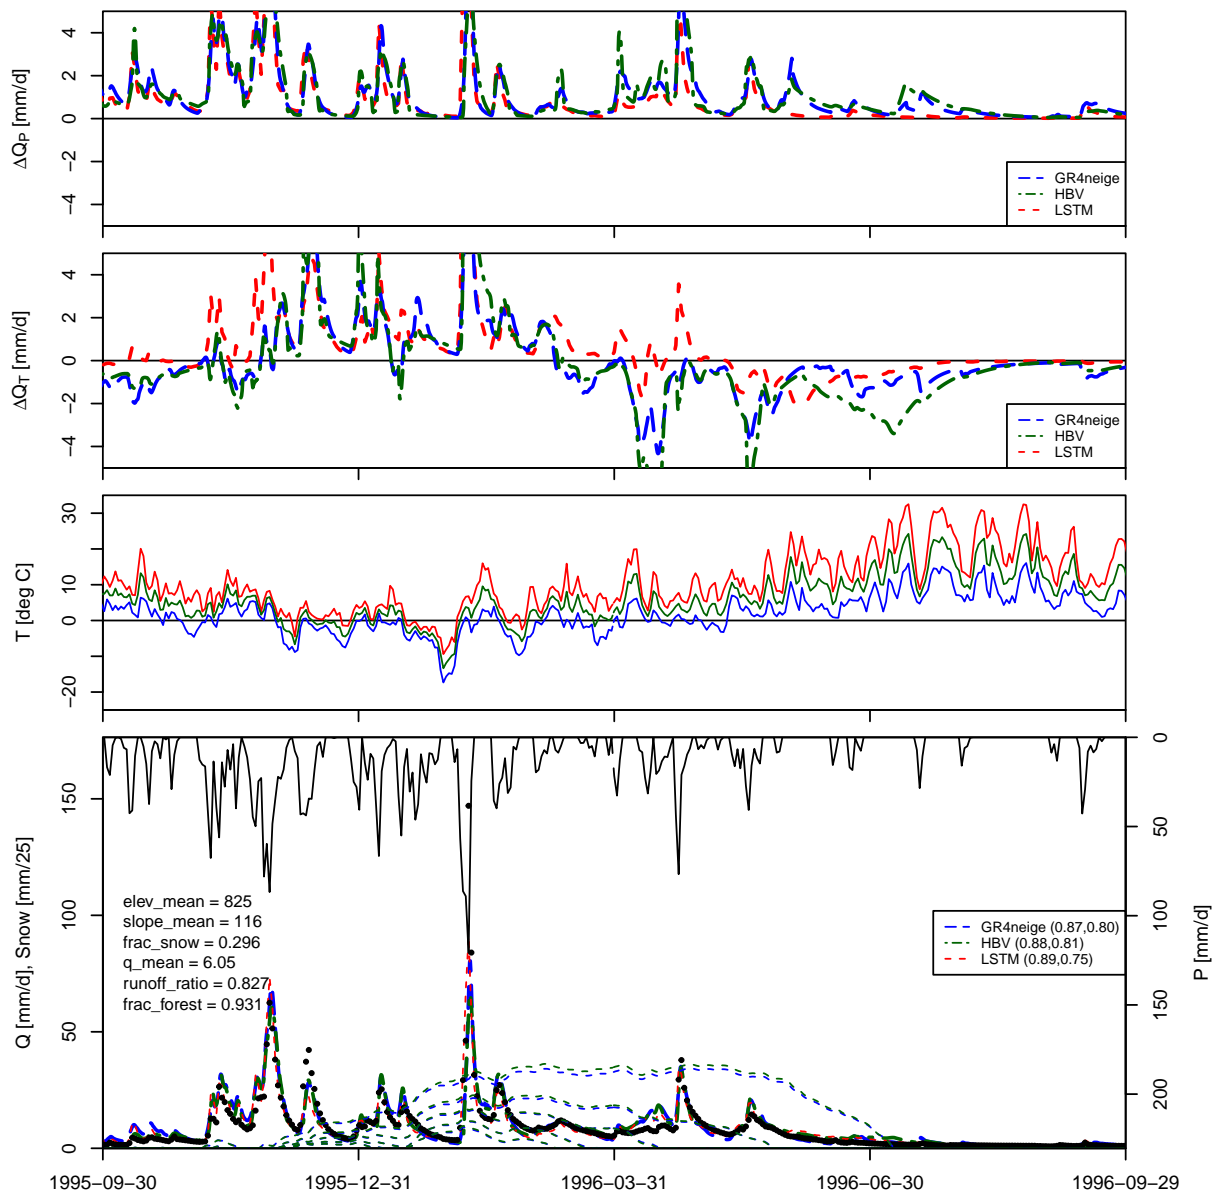

**Figure SL39.** Results for basin 14216500, Oct. 1995 - Sept. 1996 (part of validation). See Fig. 3 for an explanation of the plot panels.

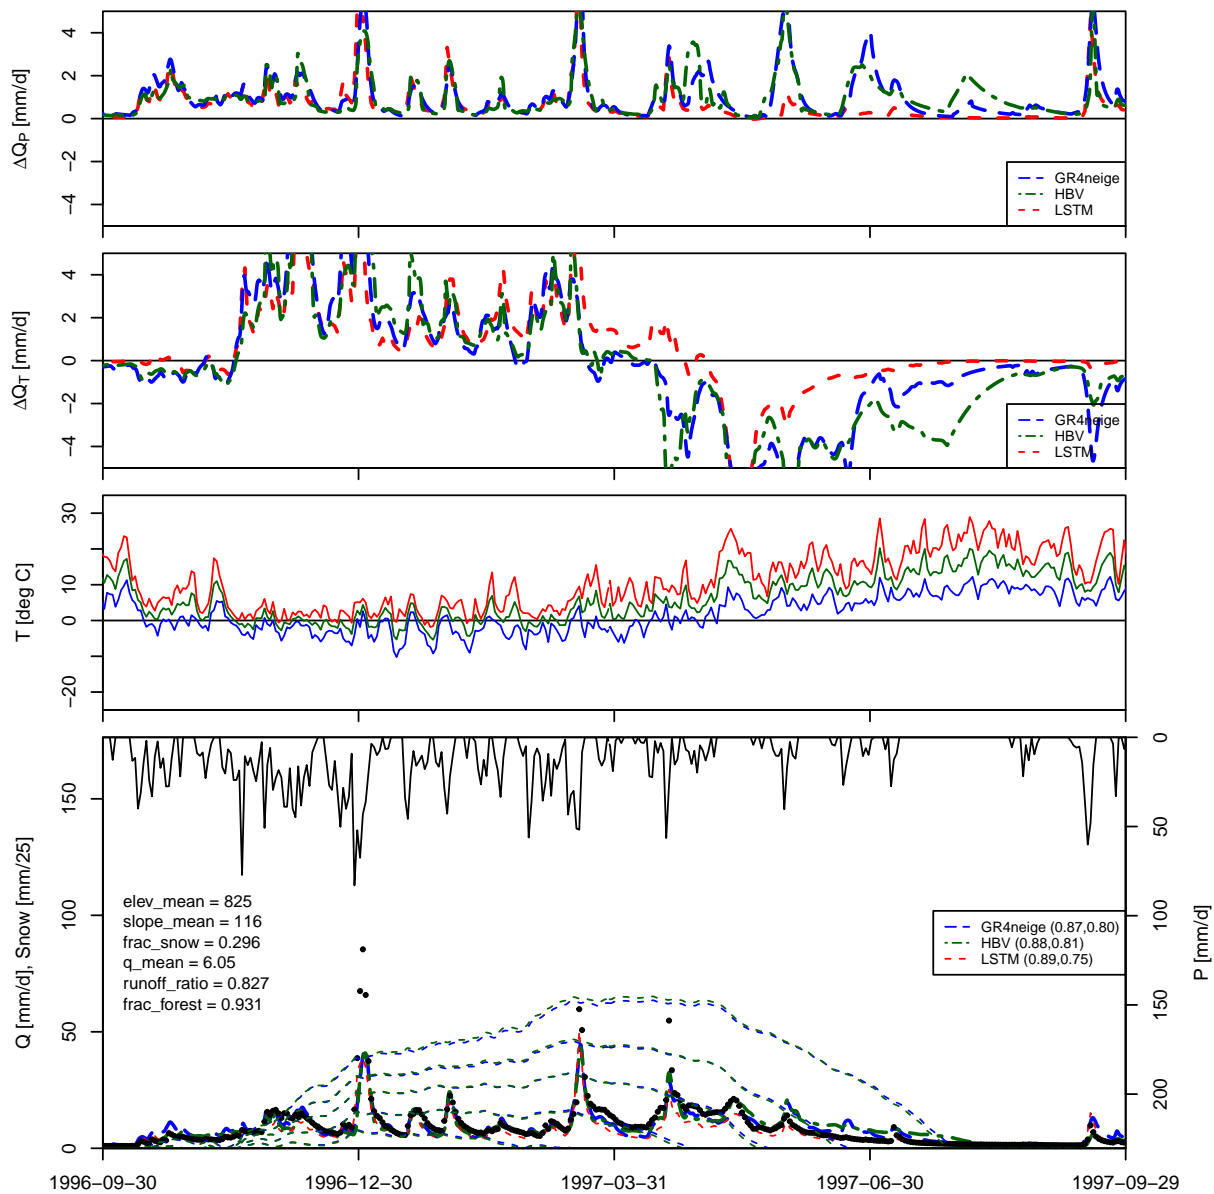

**Figure SI.40.** Results for basin 14216500, Oct. 1996 - Sept. 1997 (part of validation). See Fig. 3 for an explanation of the plot panels.

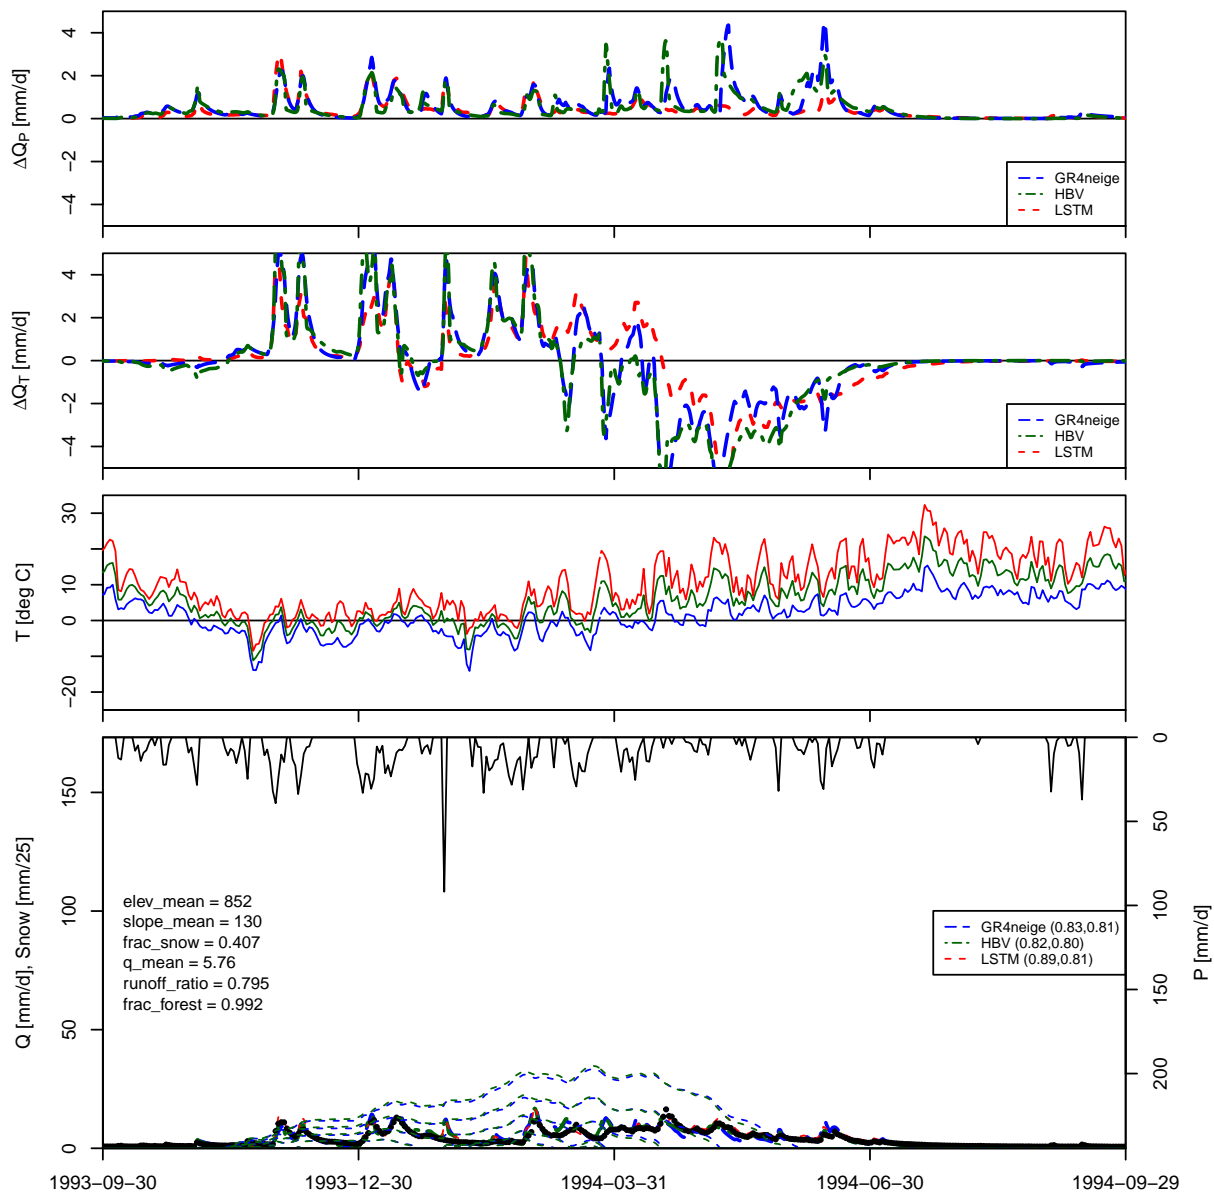

**Figure SI.41.** Results for basin 12114500, Oct. 1993 - Sept. 1994 (part of calibration). See Fig. 3 for an explanation of the plot panels.

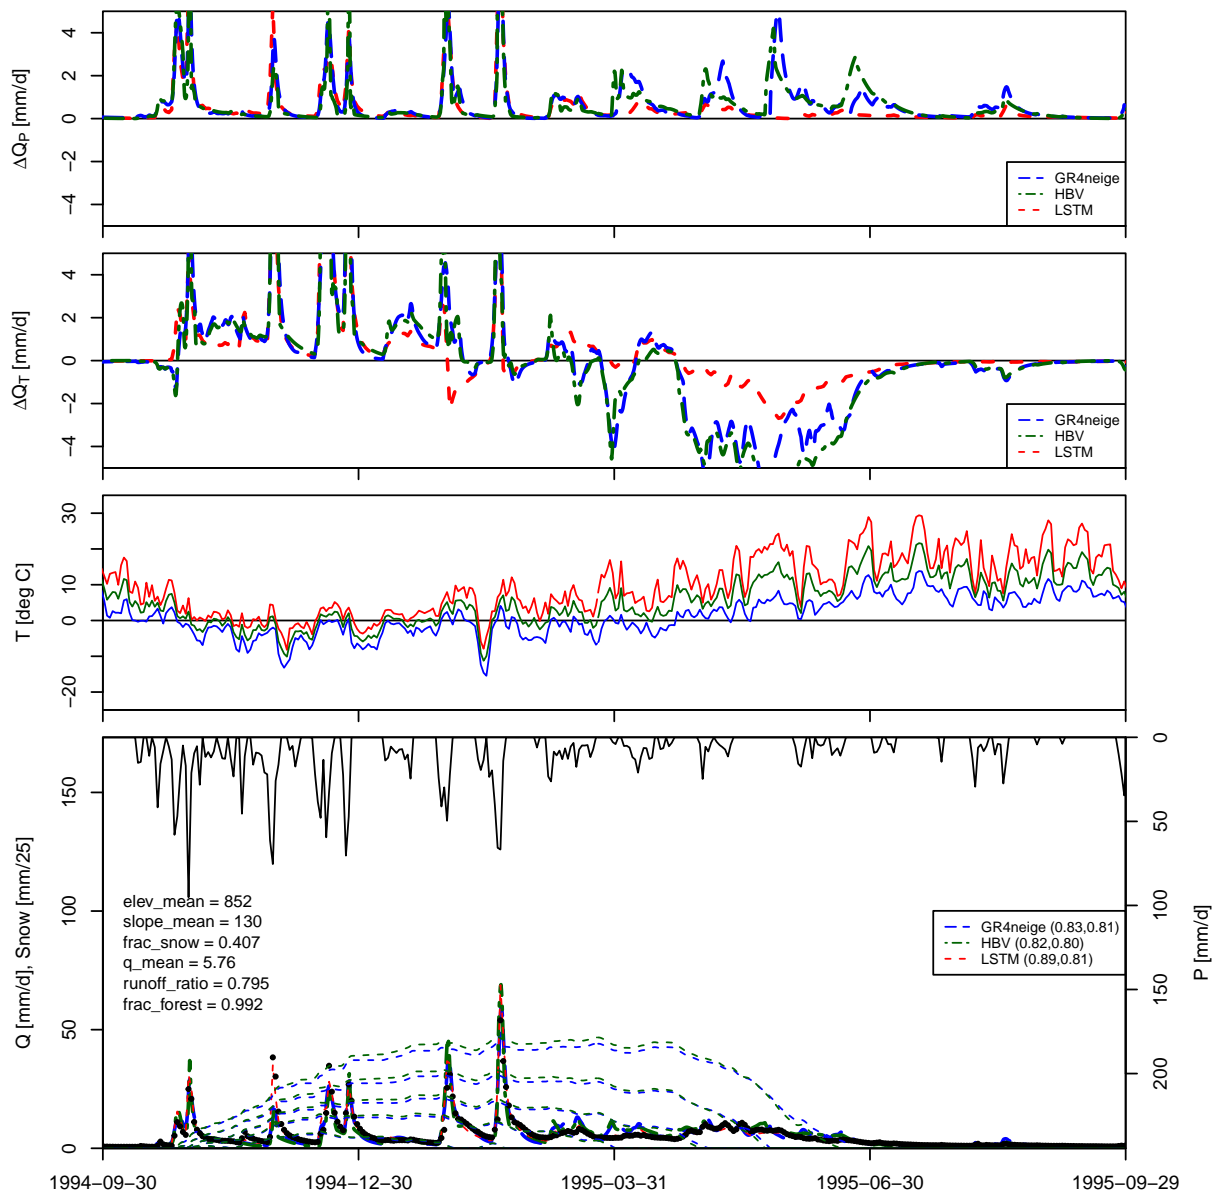

**Figure SI.42.** Results for basin 12114500, Oct. 1994 - Sept. 1995 (part of calibration). See Fig. 3 for an explanation of the plot panels.

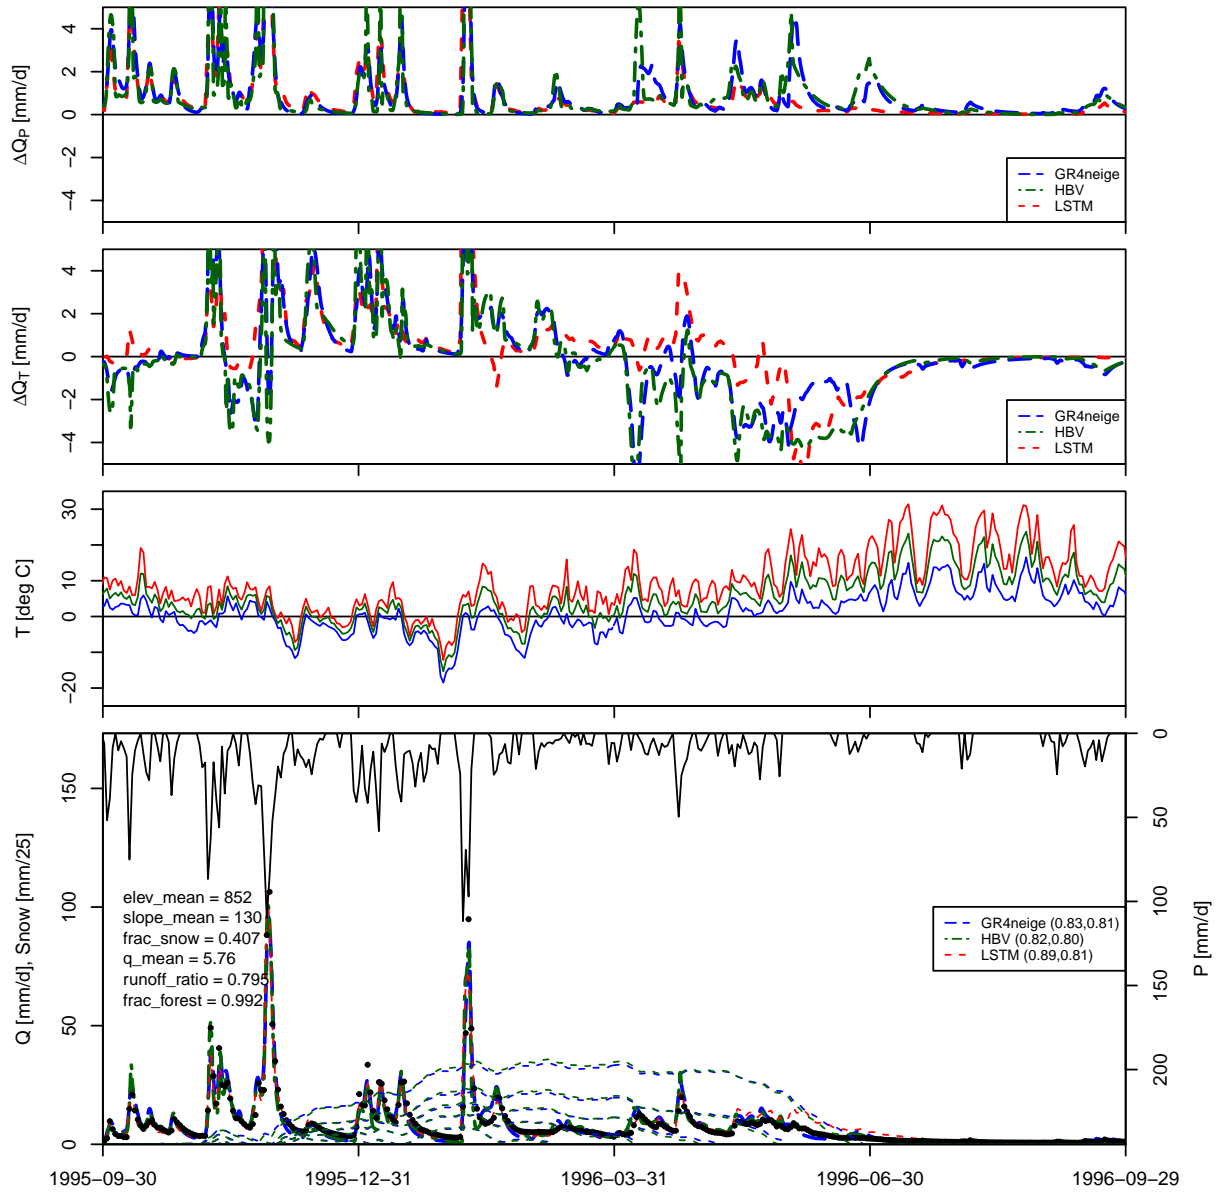

**Figure SI.43.** Results for basin 12114500, Oct. 1995 - Sept. 1996 (part of validation). See Fig. 3 for an explanation of the plot panels.

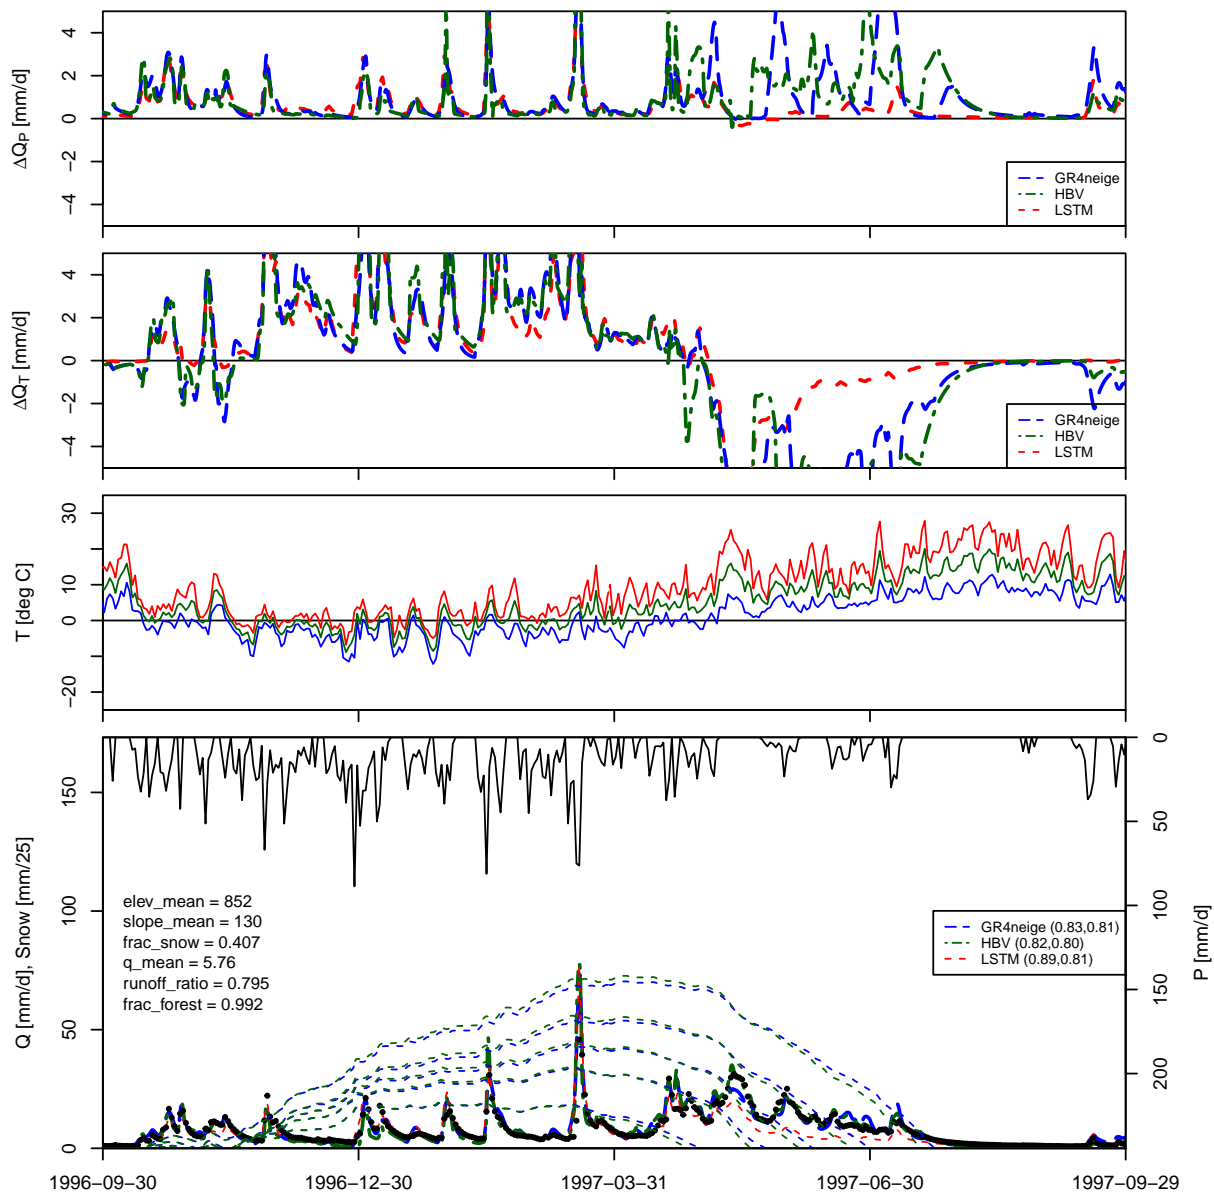

**Figure SI.44.** Results for basin 12114500, Oct. 1996 - Sept. 1997 (part of validation). See Fig. 3 for an explanation of the plot panels.

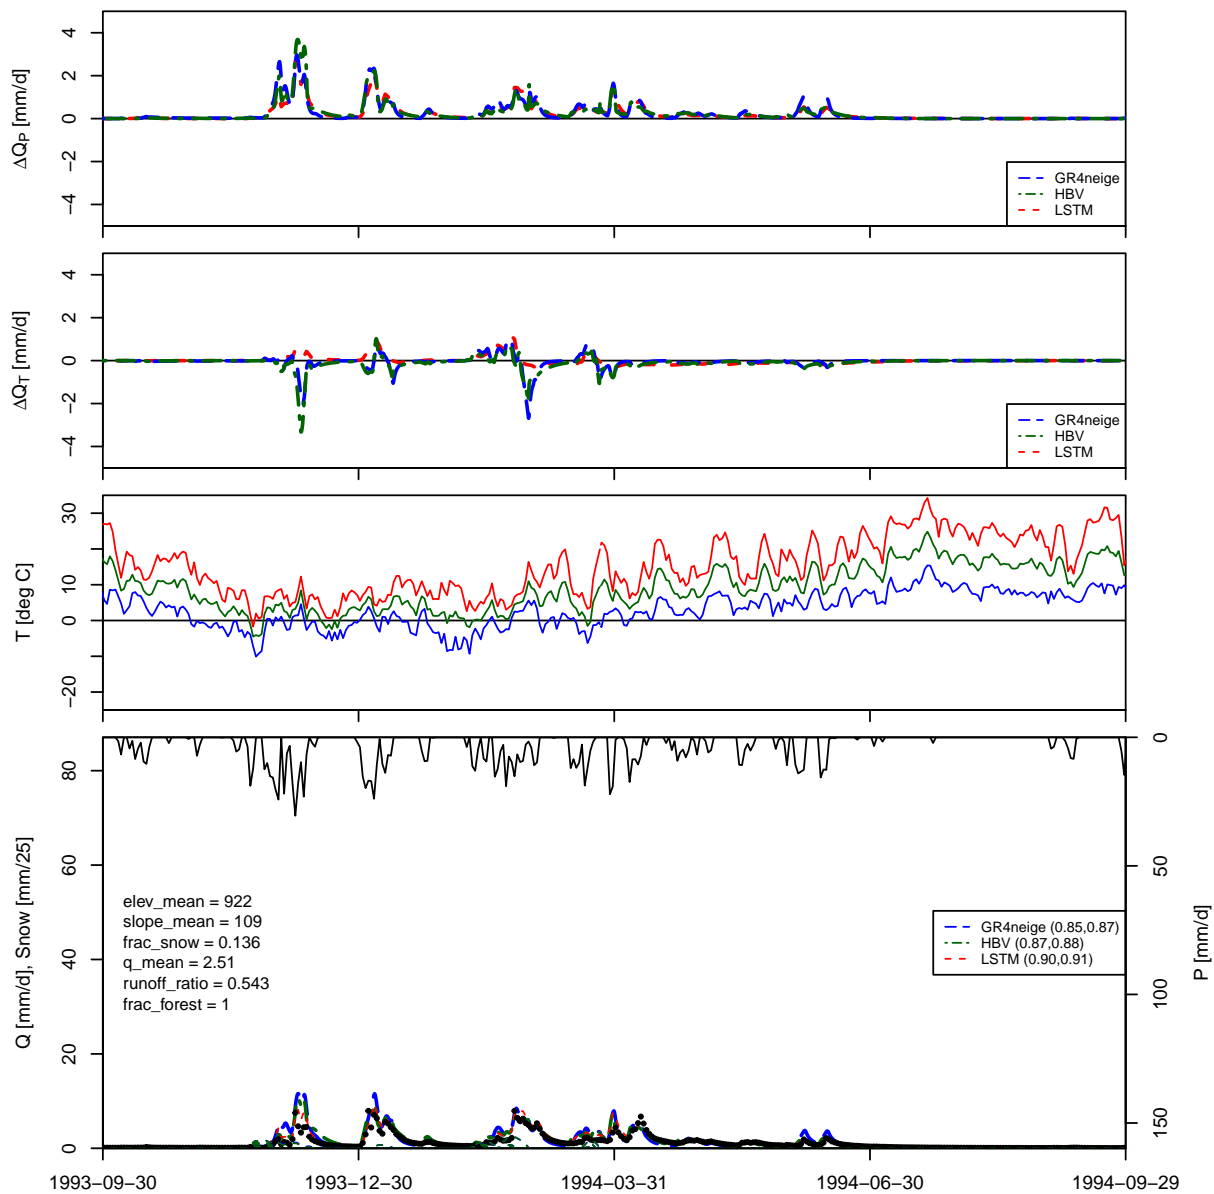

**Figure SI.45.** Results for basin 14154500, Oct. 1993 - Sept. 1994 (part of calibration). See Fig. 3 for an explanation of the plot panels.

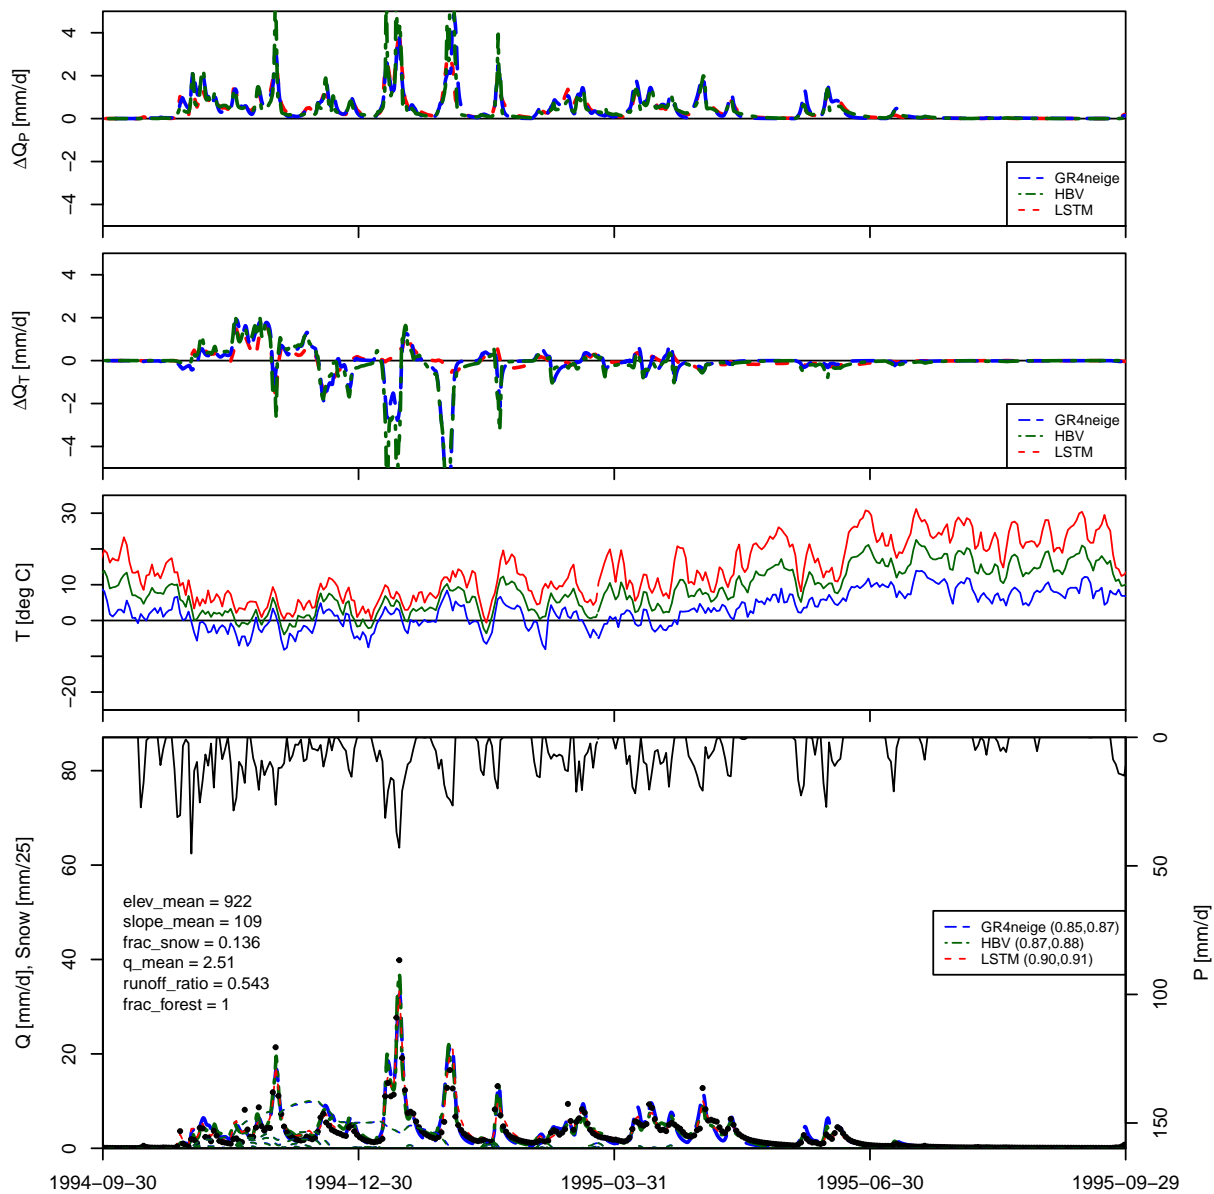

**Figure SI.46.** Results for basin 14154500, Oct. 1994 - Sept. 1995 (part of calibration). See Fig. 3 for an explanation of the plot panels.

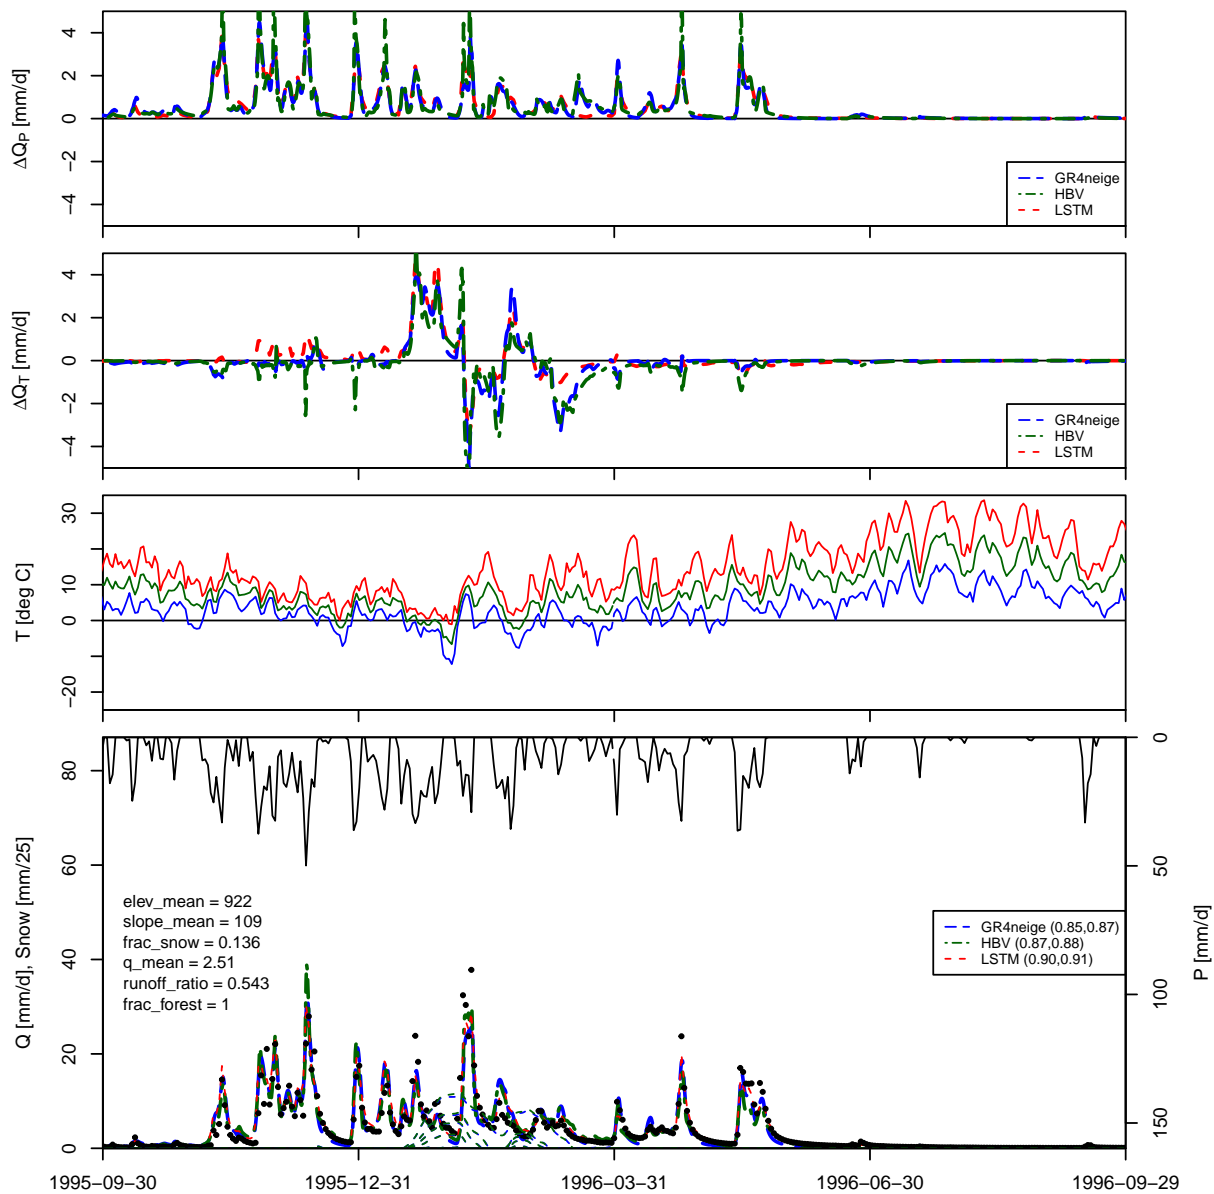

**Figure SI.47.** Results for basin 14154500, Oct. 1995 - Sept. 1996 (part of validation). See Fig. 3 for an explanation of the plot panels.

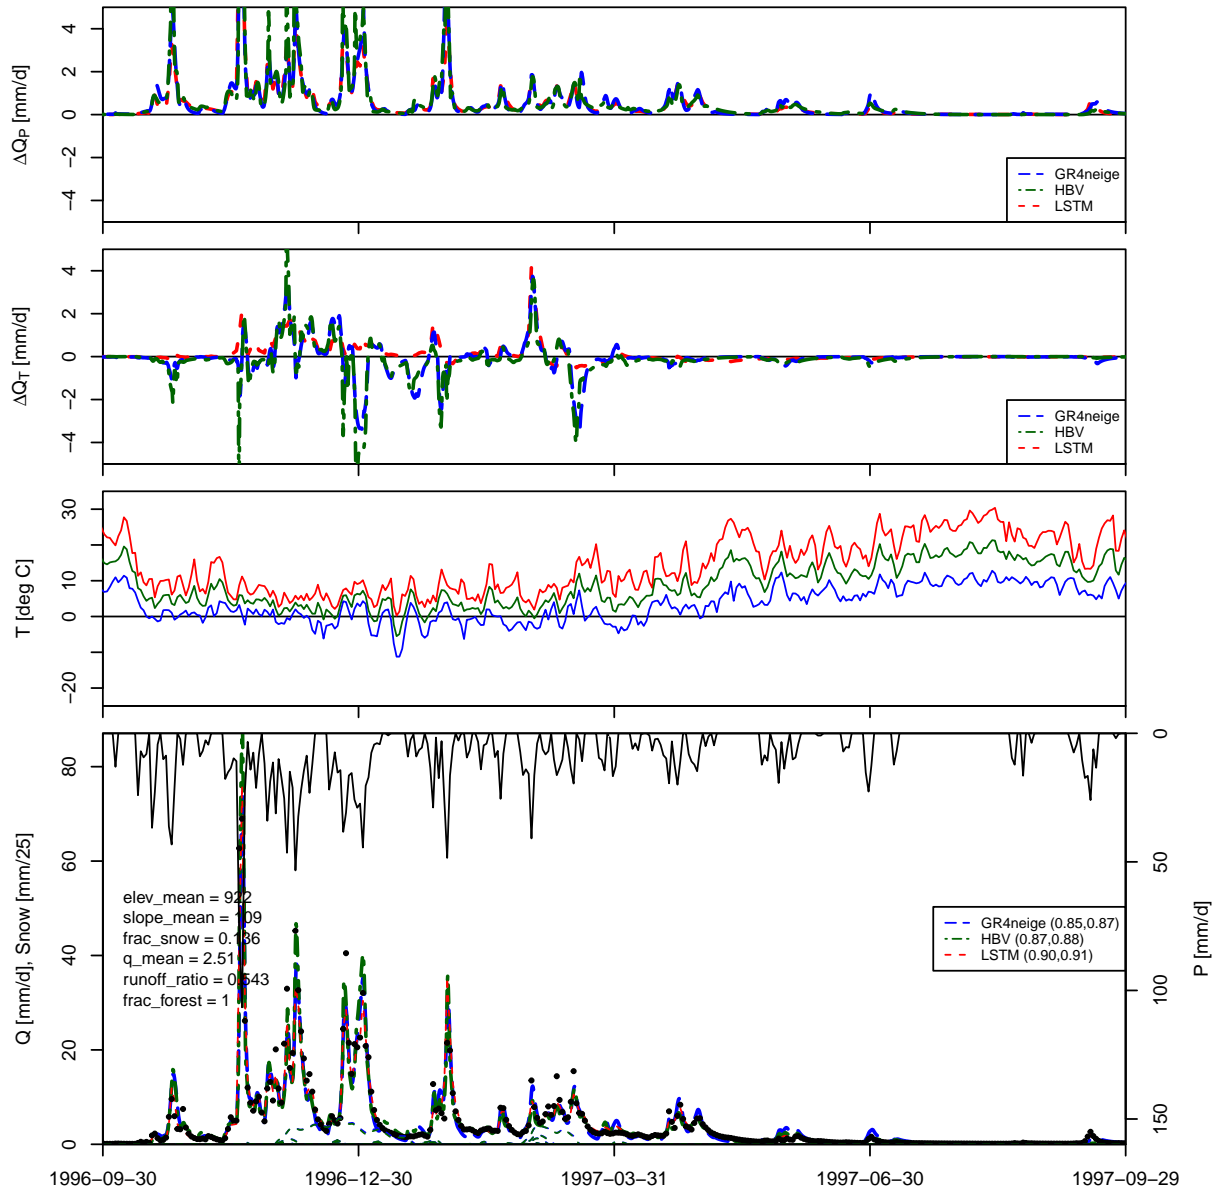

**Figure SL48.** Results for basin 14154500, Oct. 1996 - Sept. 1997 (part of validation). See Fig. 3 for an explanation of the plot panels.

## 800 **Sensitivity Analysis for Low Altitude Warm Basins**

This section provides examples of the modelled sensitivities of low altitude, warm basins in addition to the one discussed in section 3.3. See section 3.3 for explanations.

805 The Figures SI.49 to SI.52 show results within the last two years of the calibration period and within the first two years of the validation period for the basin 11468500.

The Figures SI.53 to SI.56 show results within the last two years of the calibration period and within the first two years of the validation period for the basin 08014500.

810 The Figures SI.57 to SI.60 show results within the last two years of the calibration period and within the first two years of the validation period for the basin 02363000.

The Figures SI.61 to SI.64 show results within the last two years of the calibration period and within the first two years of the validation period for the basin 12013500.

815

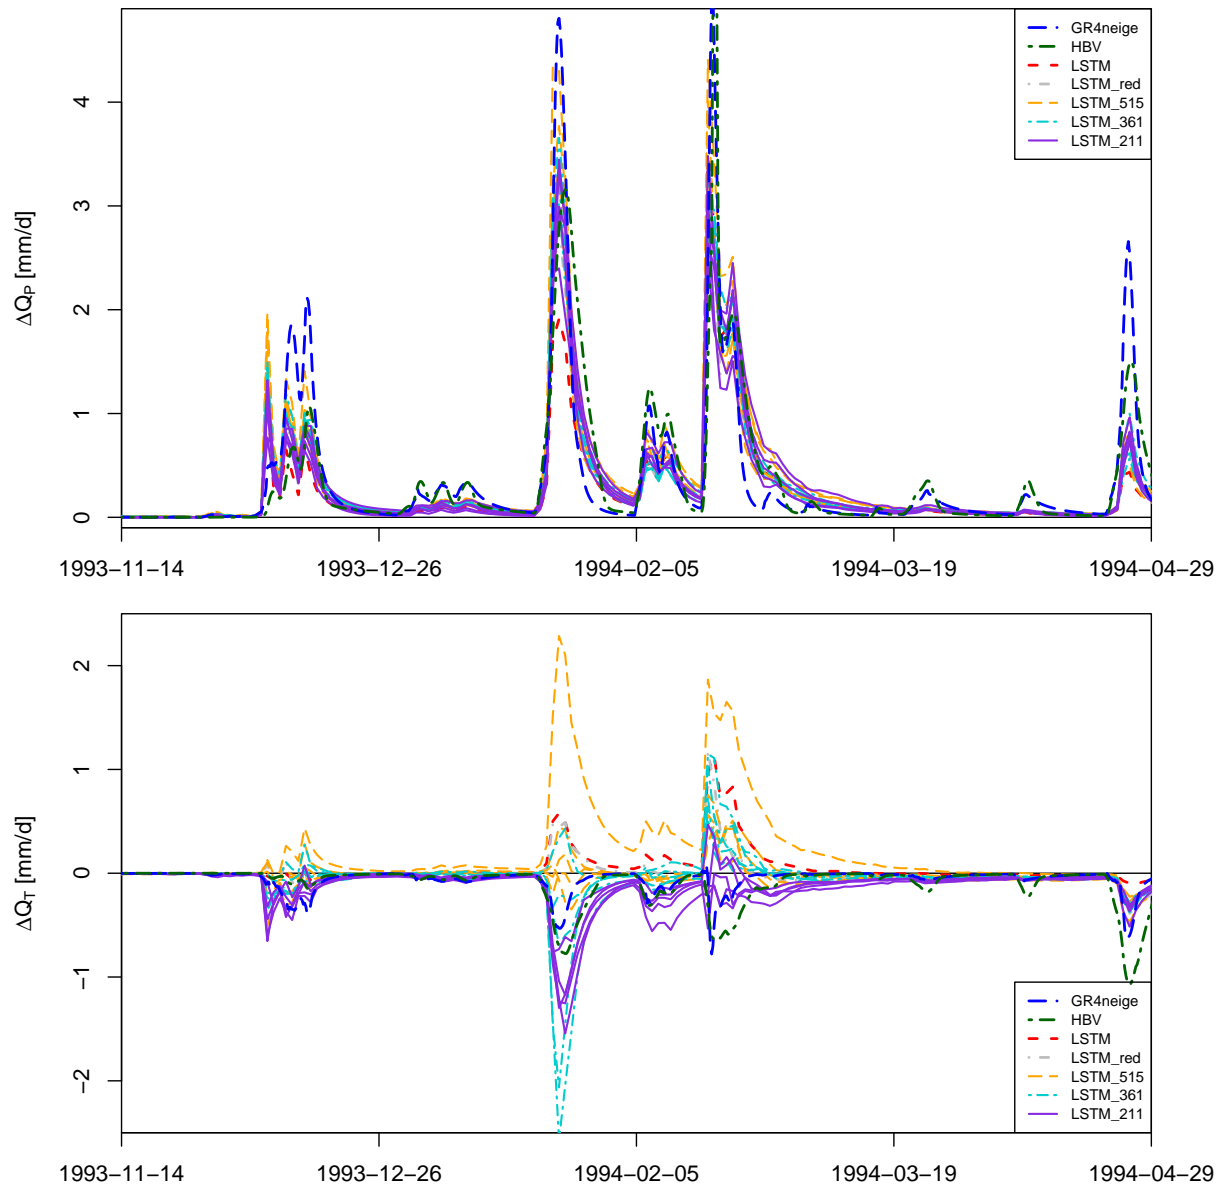

**Figure SI.49.** Sensitivities for basin 14154500, Nov. 1993 - April 1994 (part of validation). See Fig. 6 for an explanation of the plot panels.

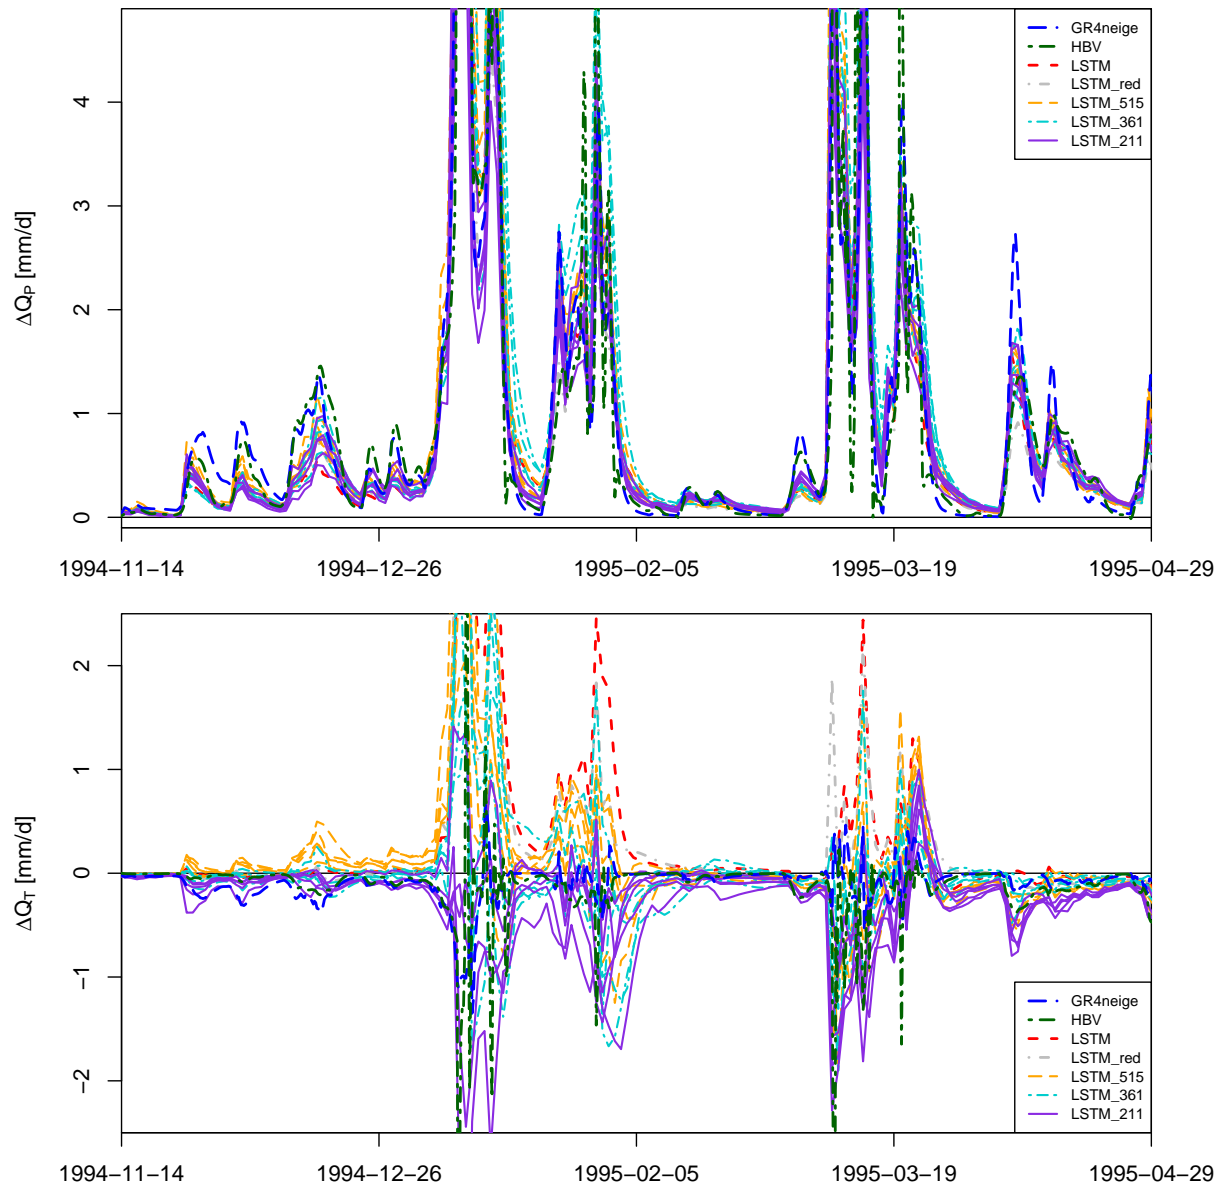

**Figure SI.50.** Sensitivities for basin 14154500, Nov. 1994 - April 1995 (part of validation). See Fig. 6 for an explanation of the plot panels.

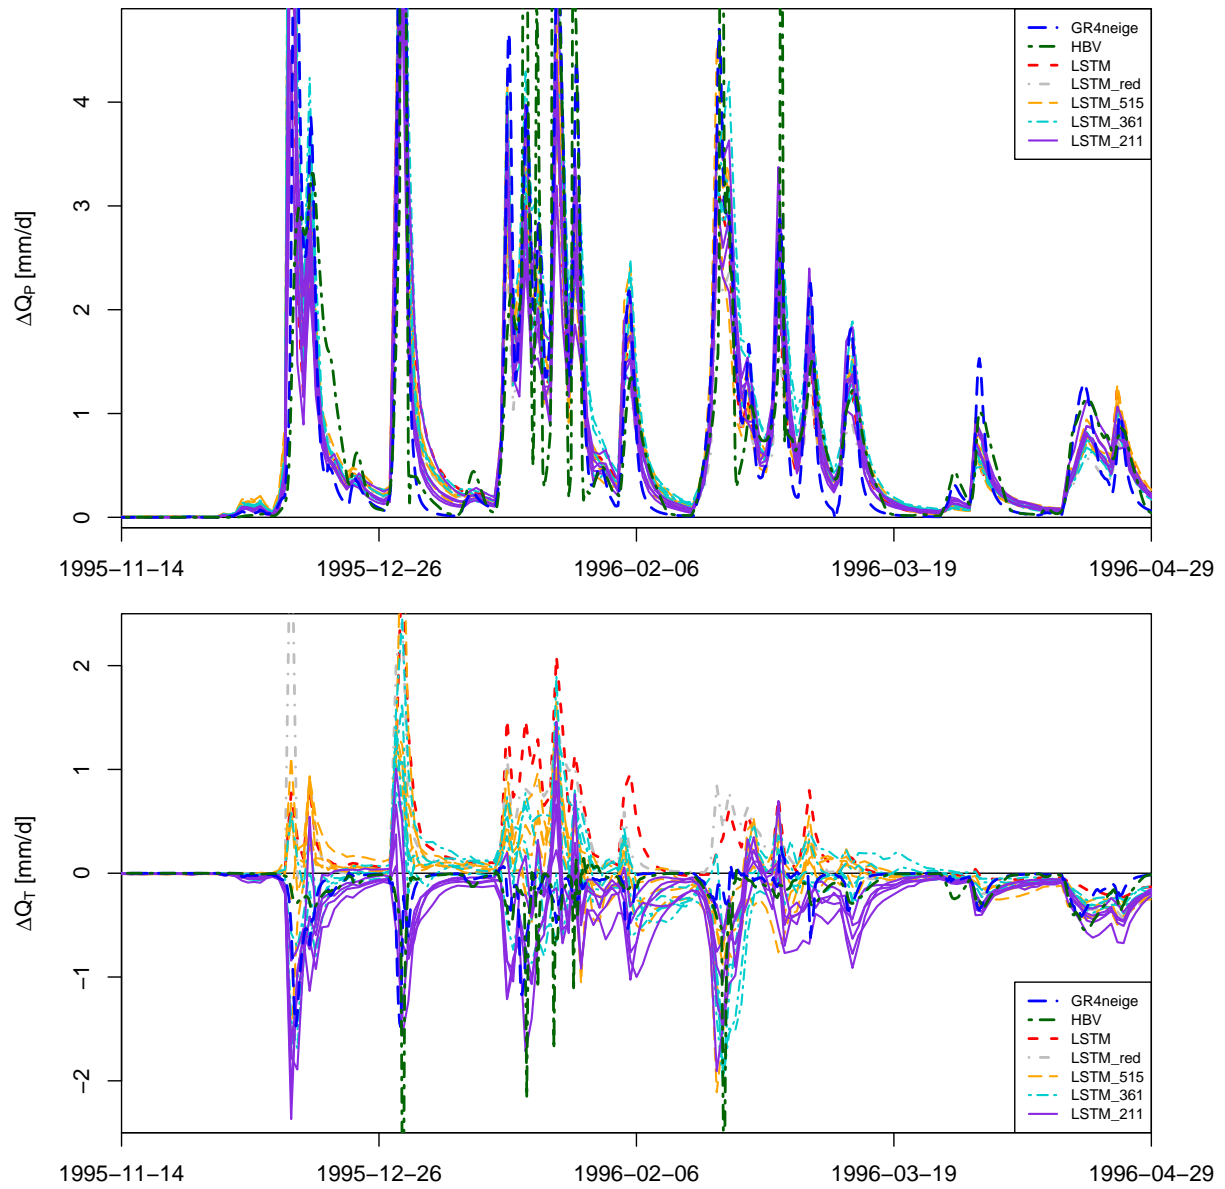

**Figure SI.51.** Sensitivities for basin 14154500, Nov. 1995 - April 1996 (part of validation). See Fig. 6 for an explanation of the plot panels.

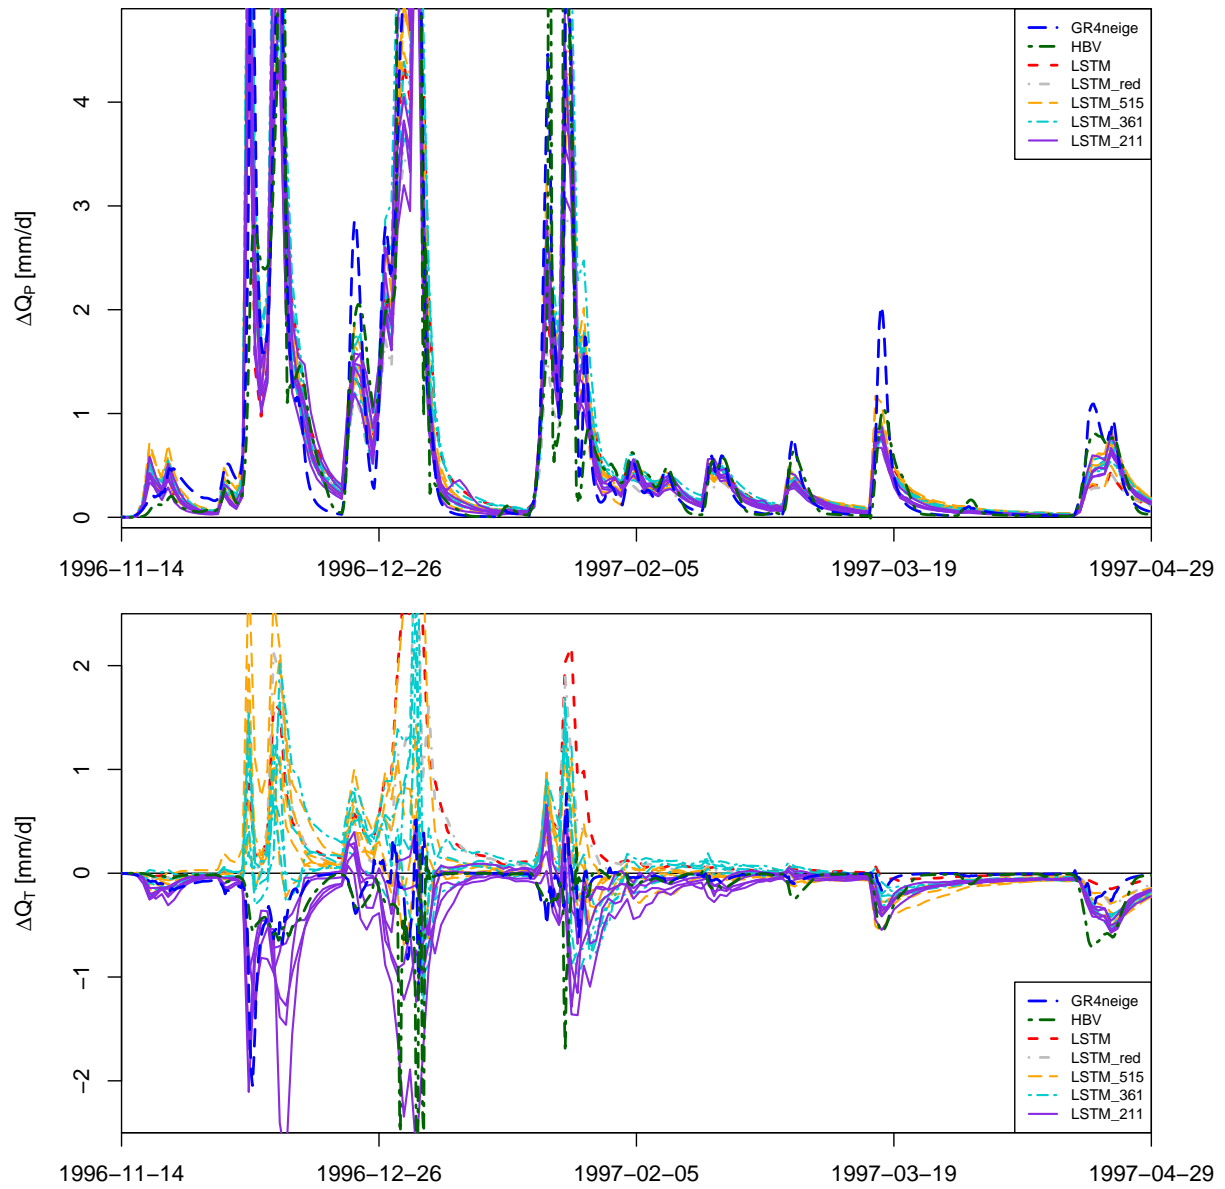

**Figure SI.52.** Sensitivities for basin 14154500, Nov. 1996 - April 1997 (part of validation). See Fig. 6 for an explanation of the plot panels.

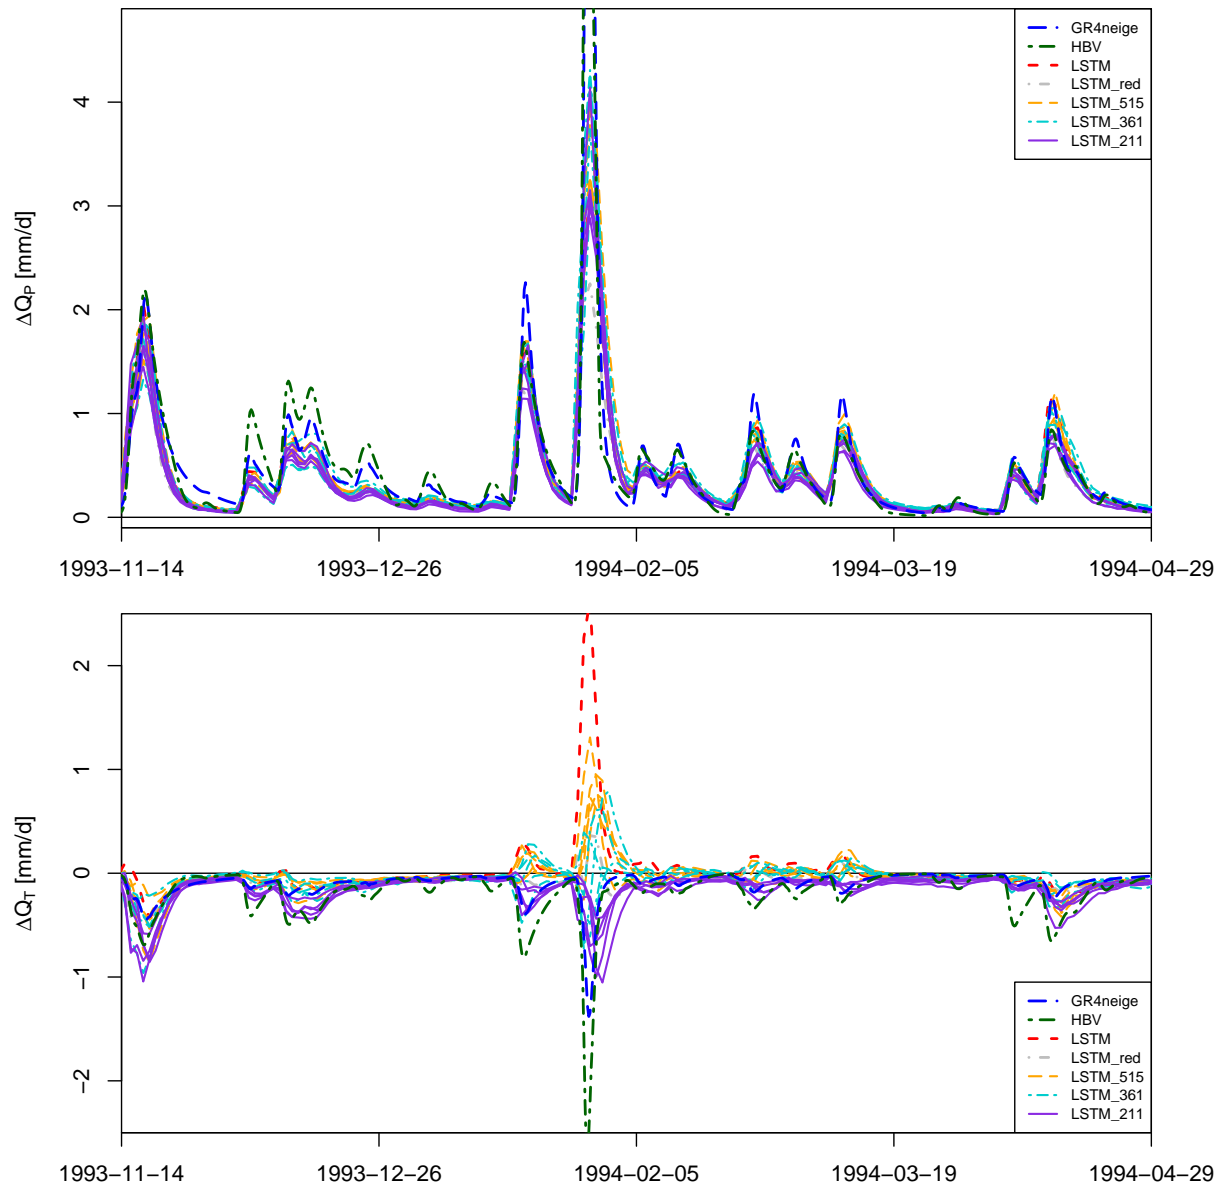

**Figure SI.53.** Sensitivities for basin 08014500, Nov. 1993 - April 1994 (part of validation). See Fig. 6 for an explanation of the plot panels.

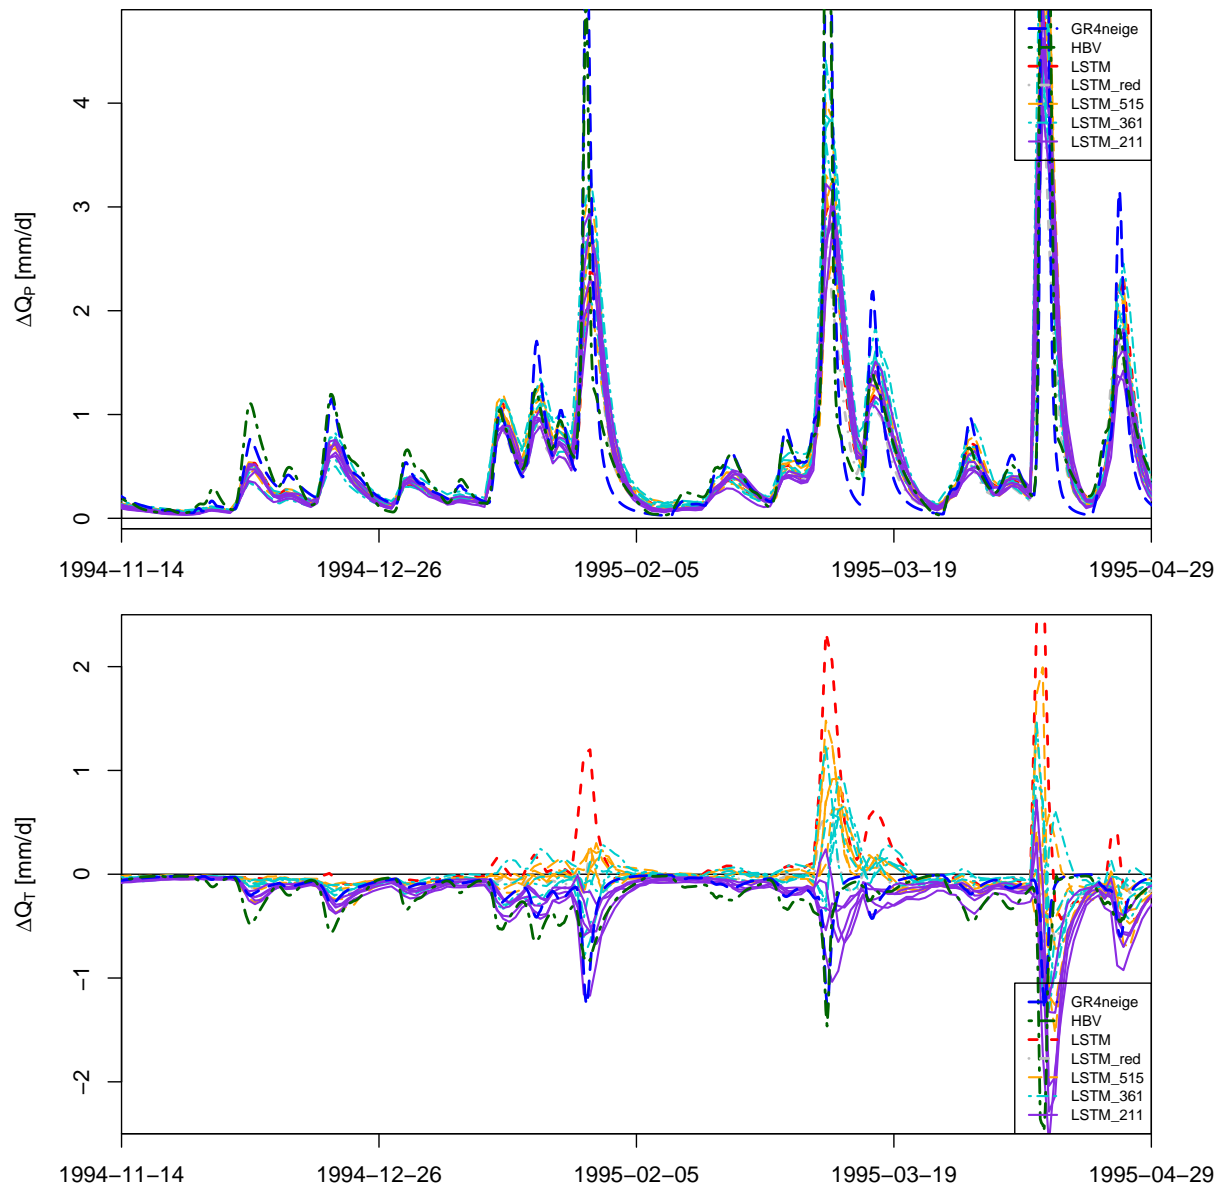

**Figure SI.54.** Sensitivities for basin 08014500, Nov. 1994 - April 1995 (part of validation). See Fig. 6 for an explanation of the plot panels.

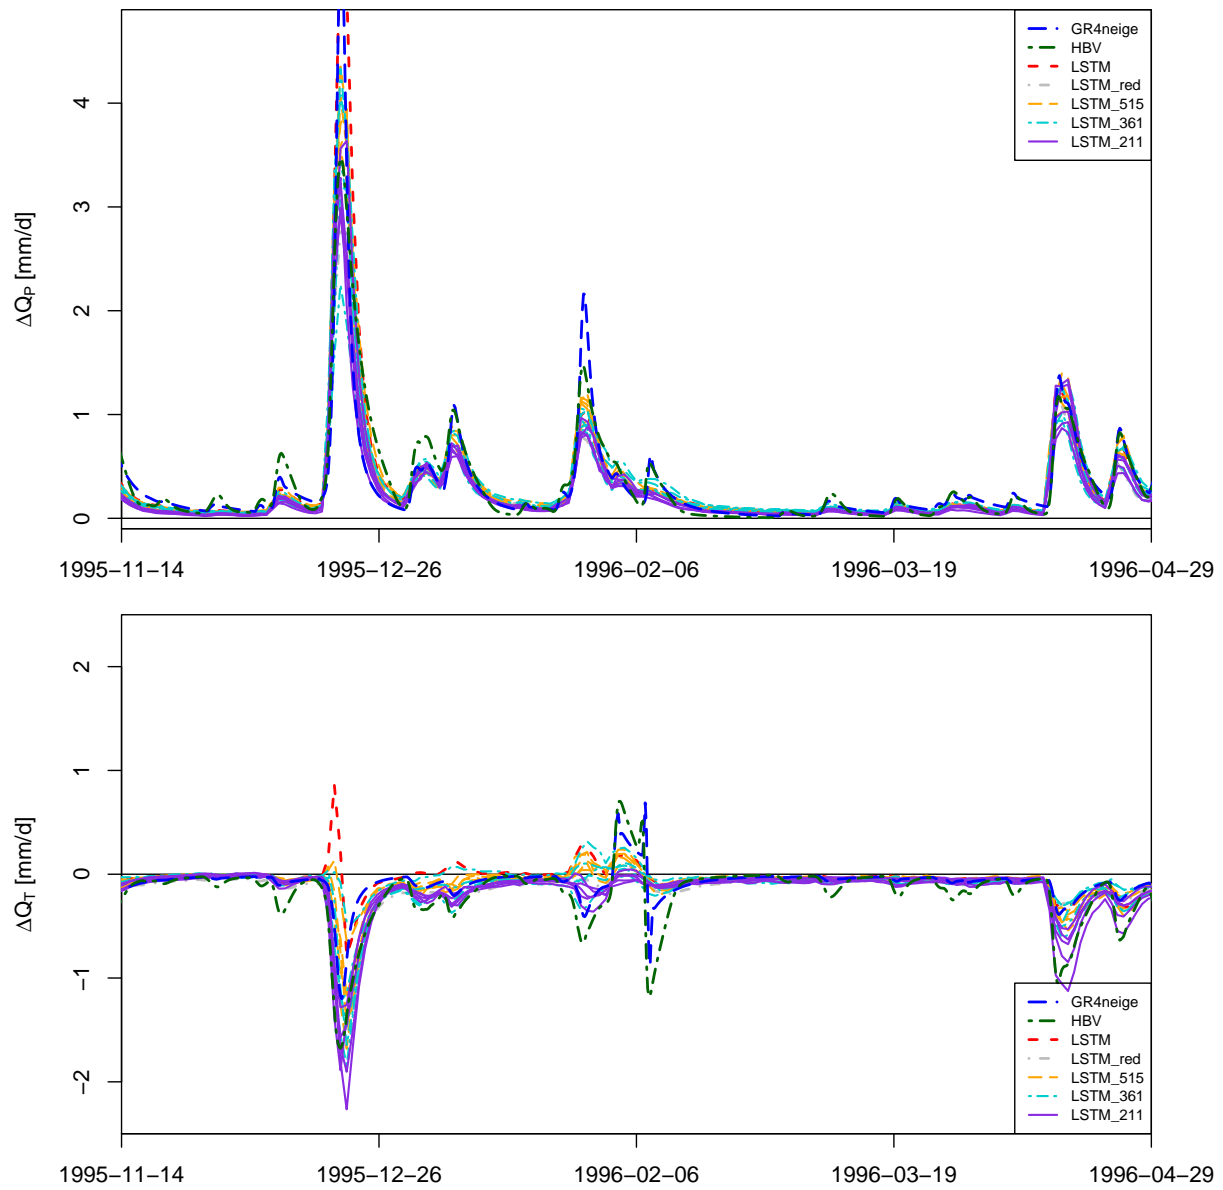

**Figure SI.55.** Sensitivities for basin 08014500, Nov. 1995 - April 1996 (part of validation). See Fig. 6 for an explanation of the plot panels.

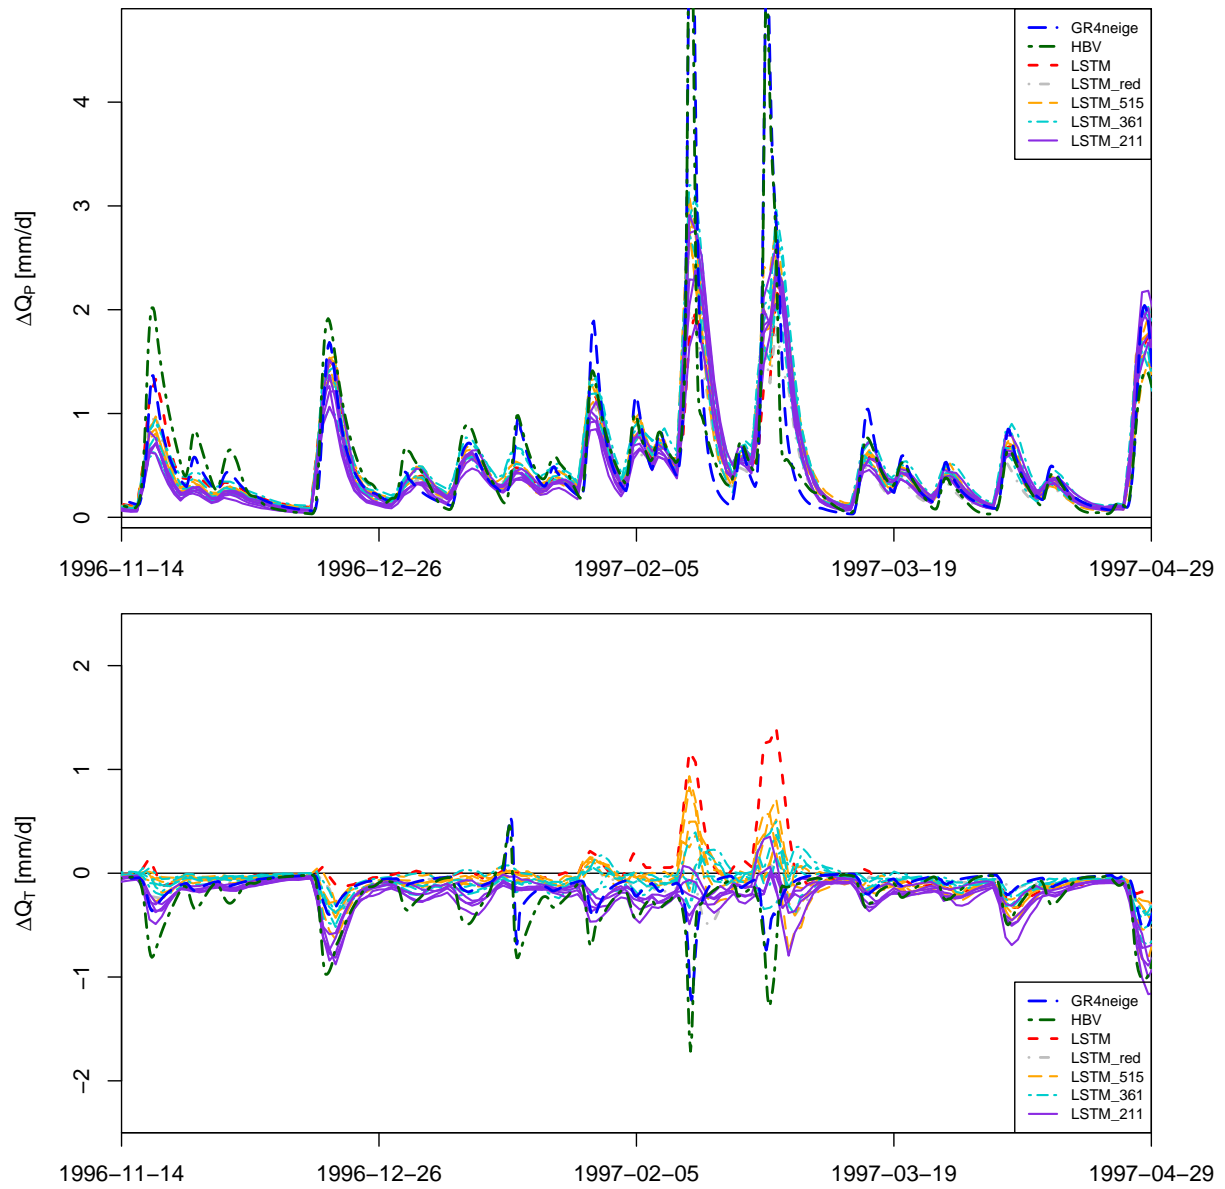

**Figure SI.56.** Sensitivities for basin 08014500, Nov. 1996 - April 1997 (part of validation). See Fig. 6 for an explanation of the plot panels.

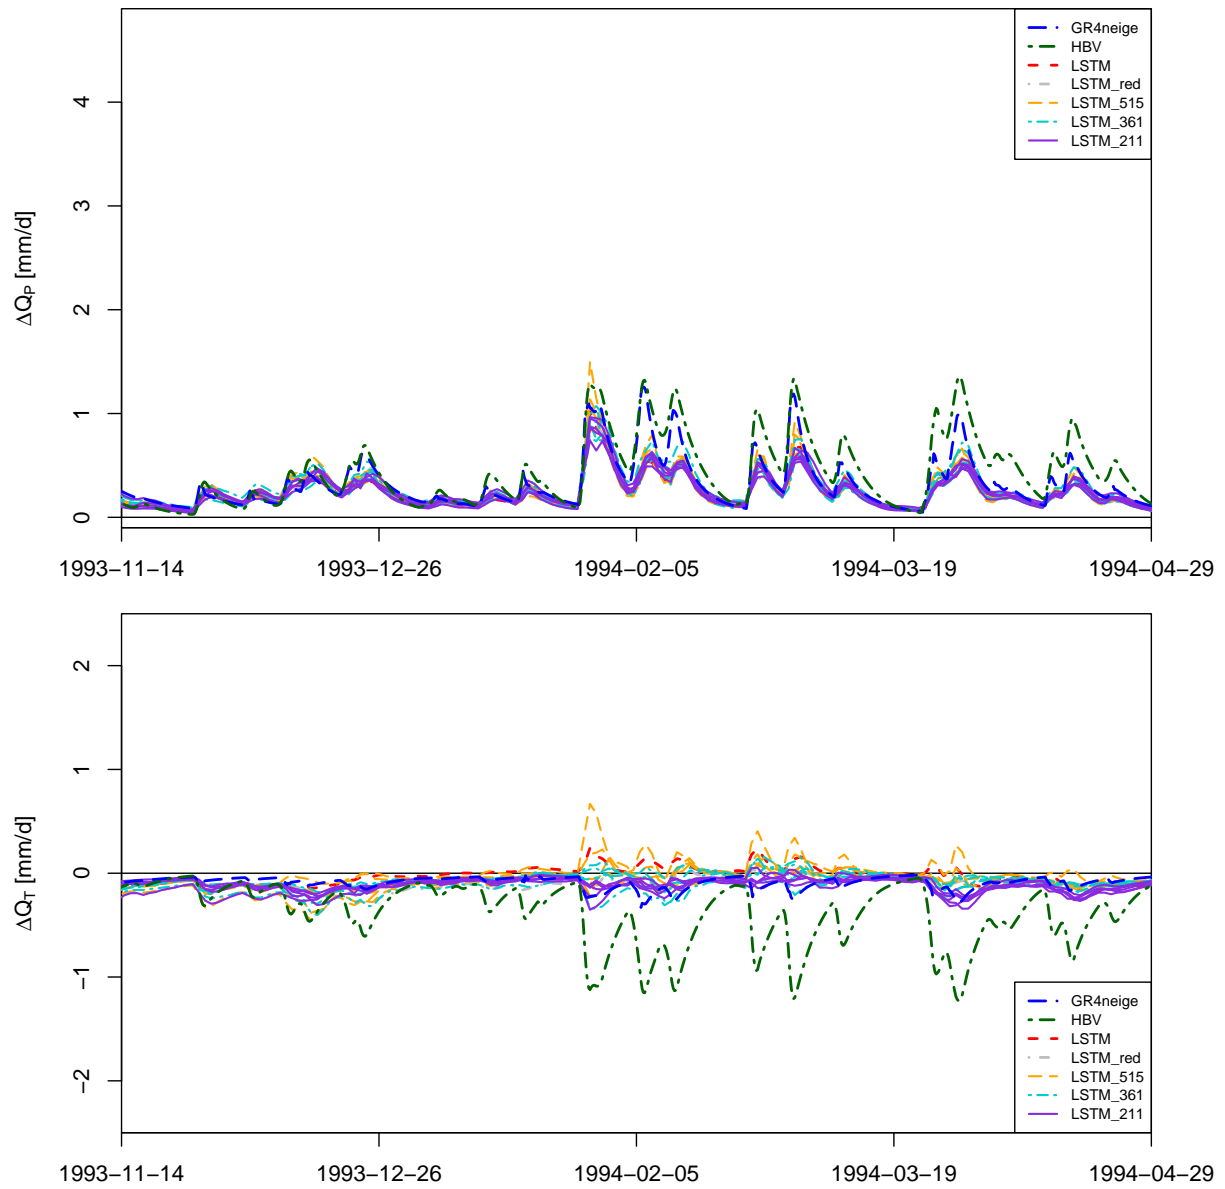

**Figure SI.57.** Sensitivities for basin 02363000, Nov. 1993 - April 1994 (part of validation). See Fig. 6 for an explanation of the plot panels.

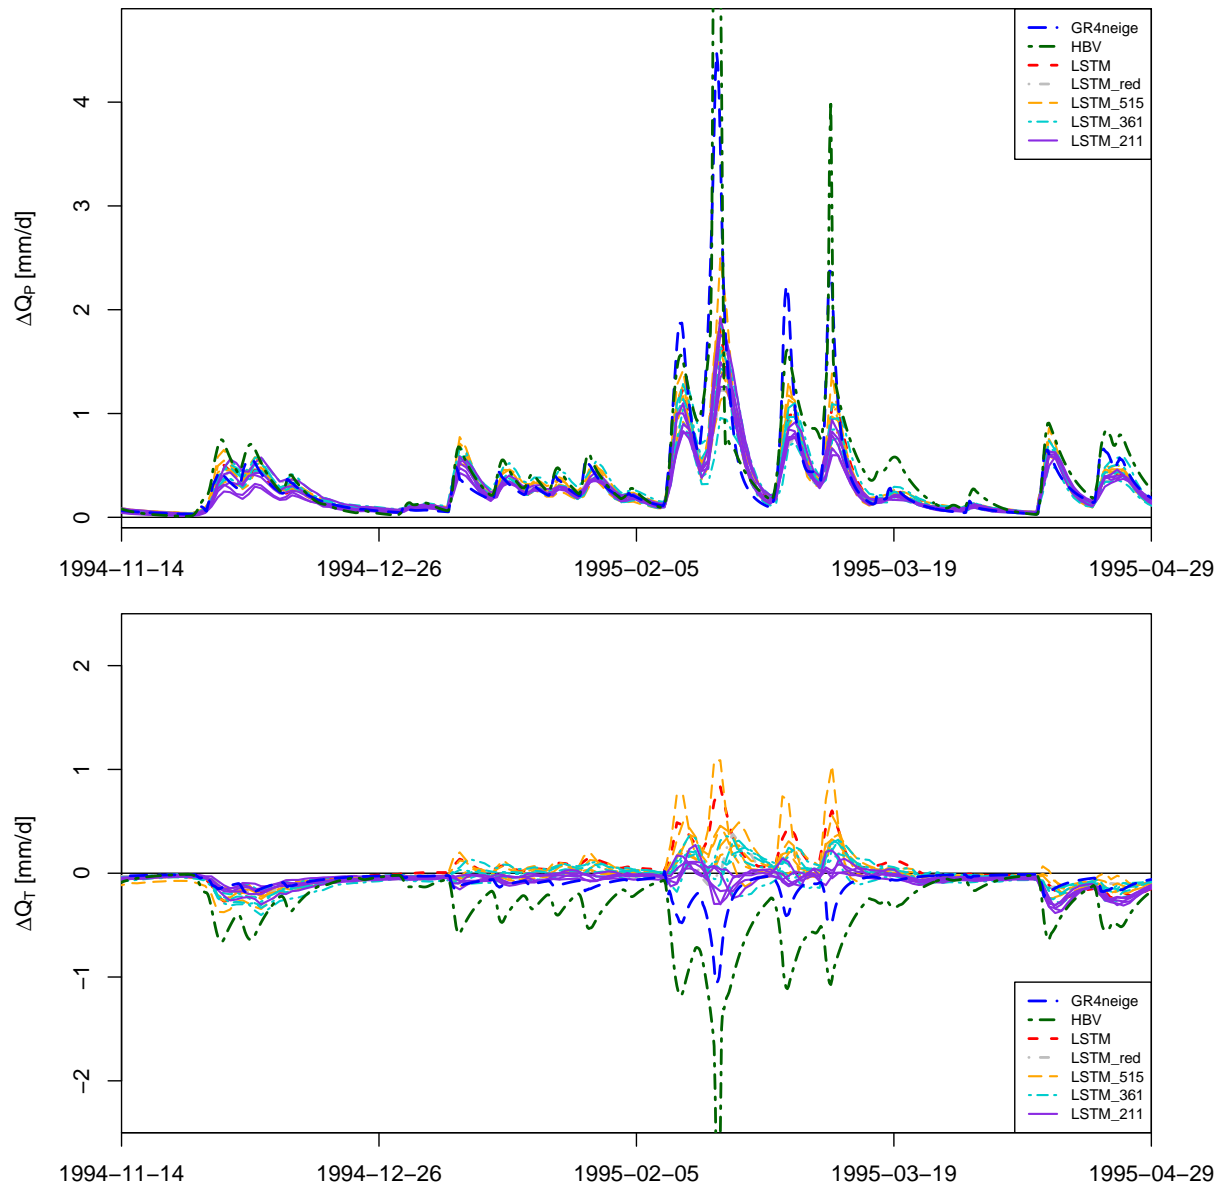

**Figure SI.58.** Sensitivities for basin 02363000, Nov. 1994 - April 1995 (part of validation). See Fig. 6 for an explanation of the plot panels.

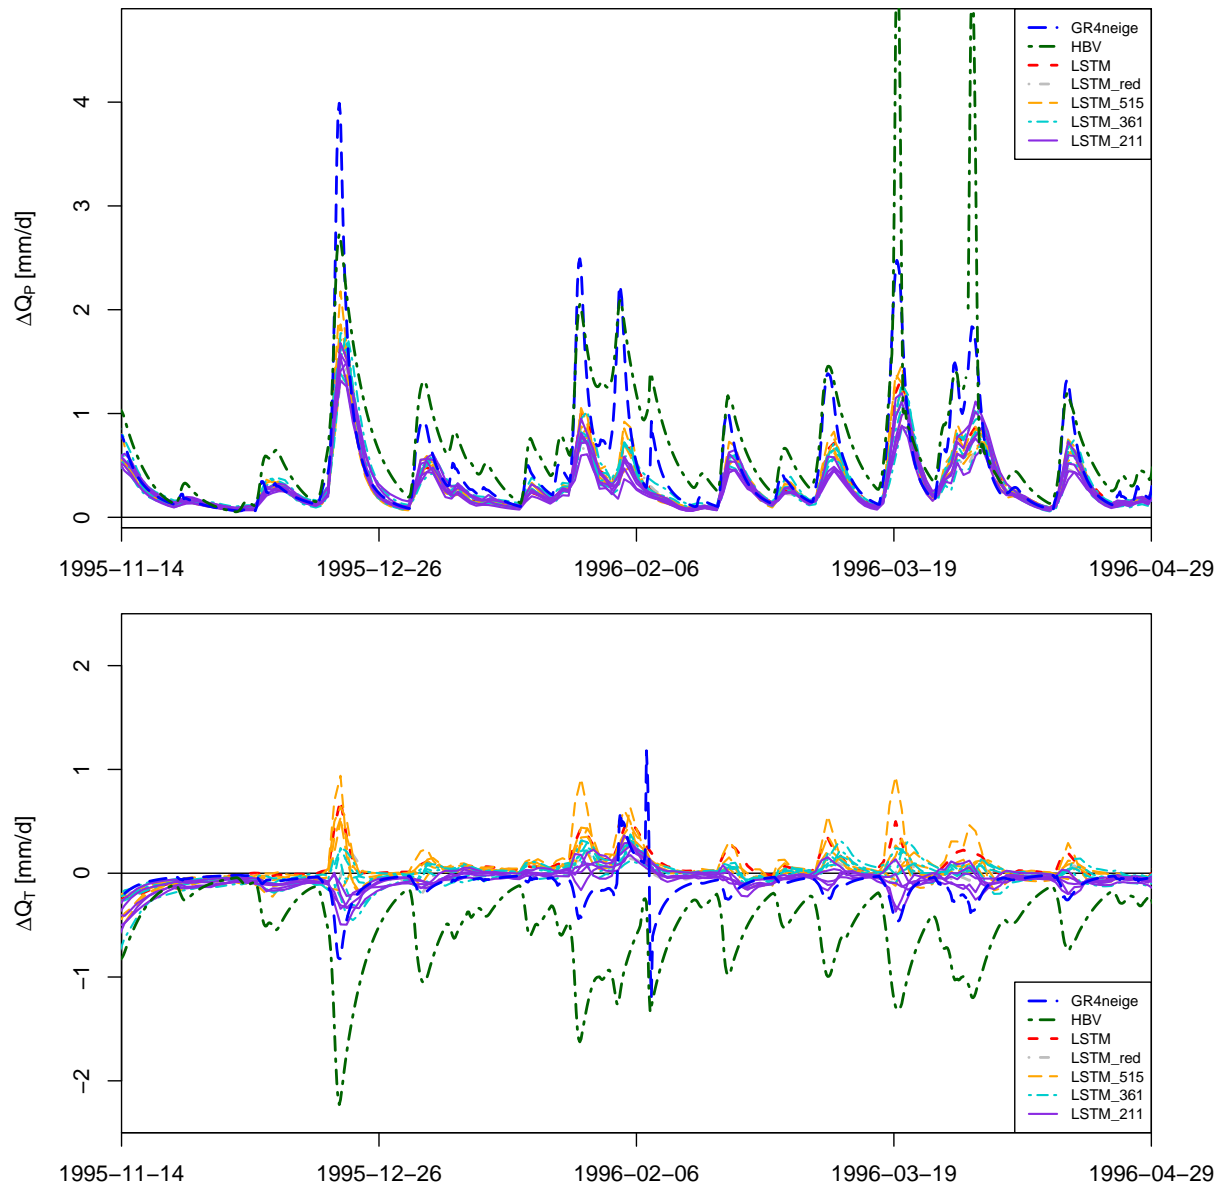

**Figure SI.59.** Sensitivities for basin 02363000, Nov. 1995 - April 1996 (part of validation). See Fig. 6 for an explanation of the plot panels.

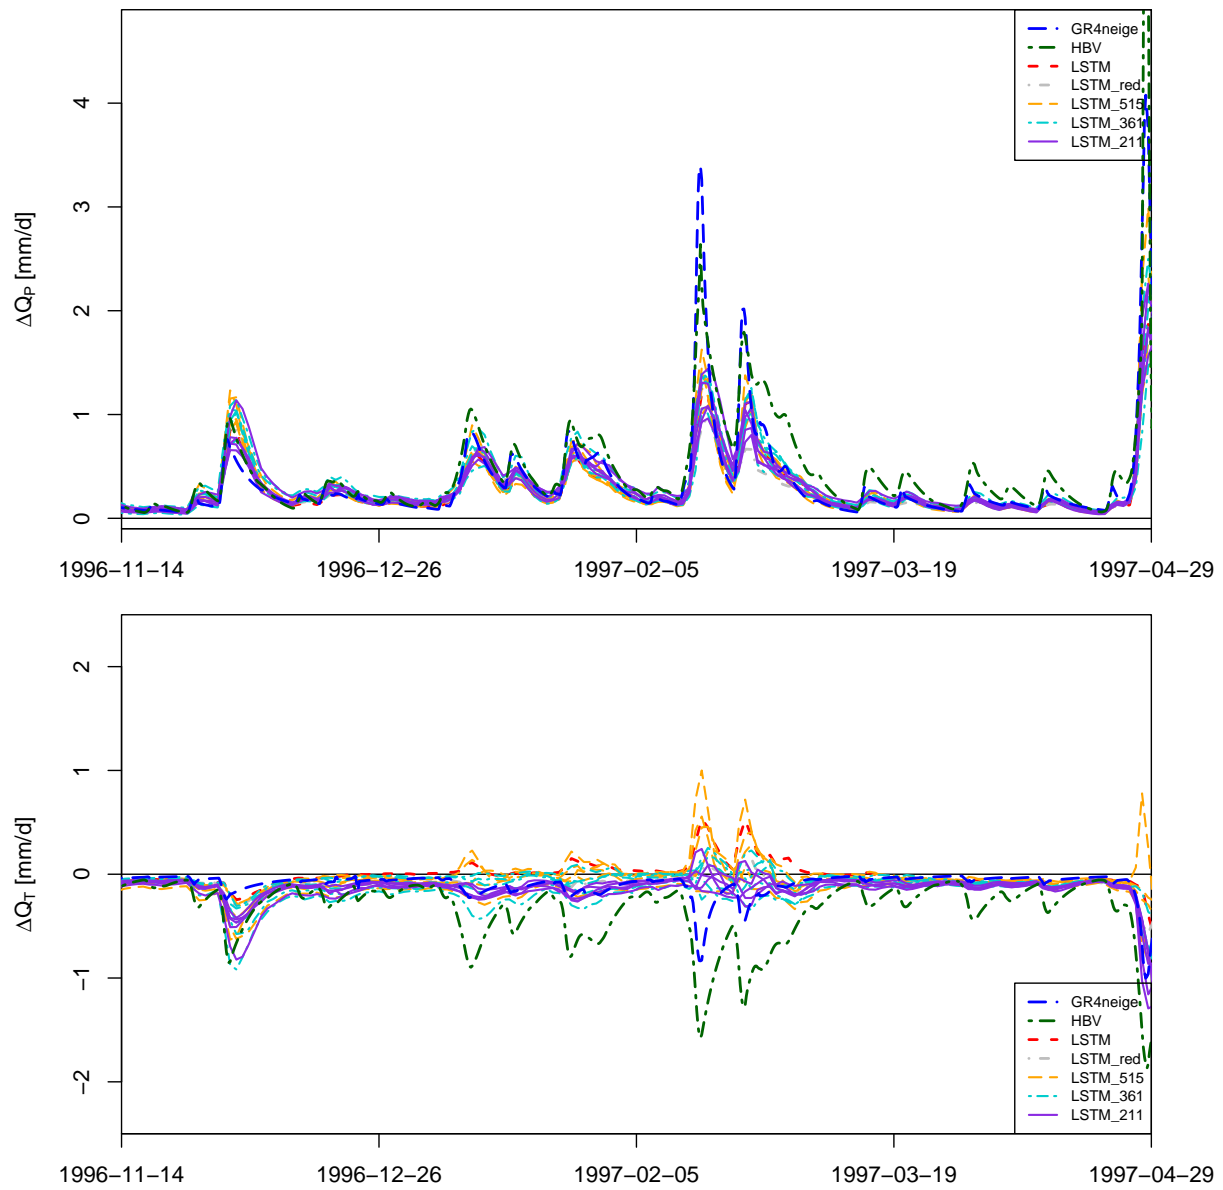

**Figure SI.60.** Sensitivities for basin 02363000, Nov. 1996 - April 1997 (part of validation). See Fig. 6 for an explanation of the plot panels.

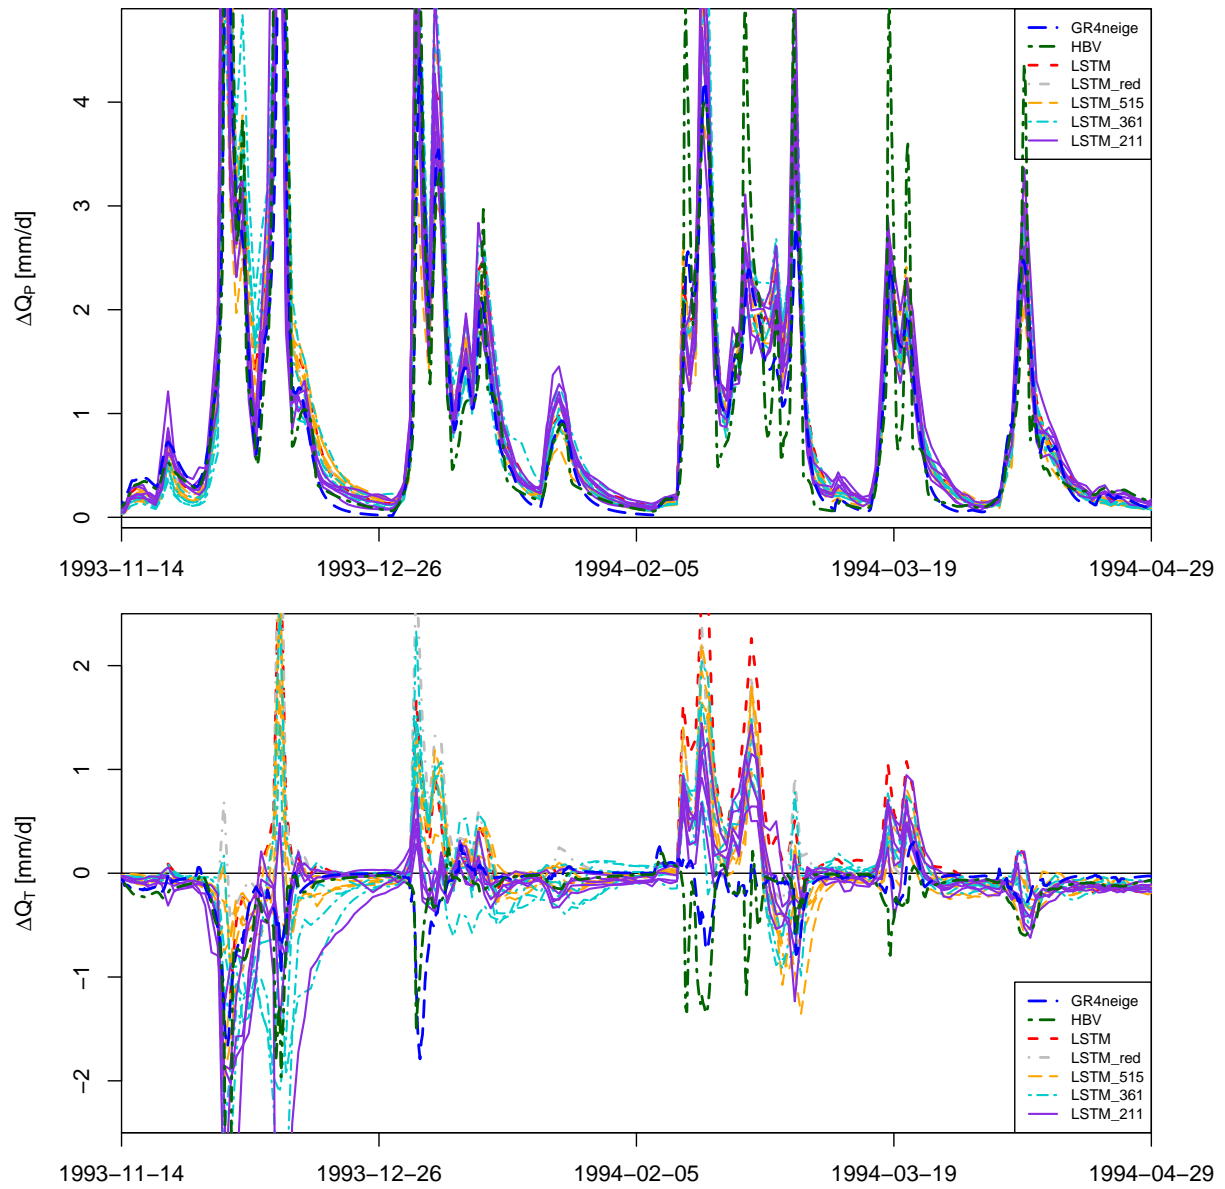

**Figure SL61.** Sensitivities for basin 12013500, Nov. 1993 - April 1994 (part of validation). See Fig. 6 for an explanation of the plot panels.

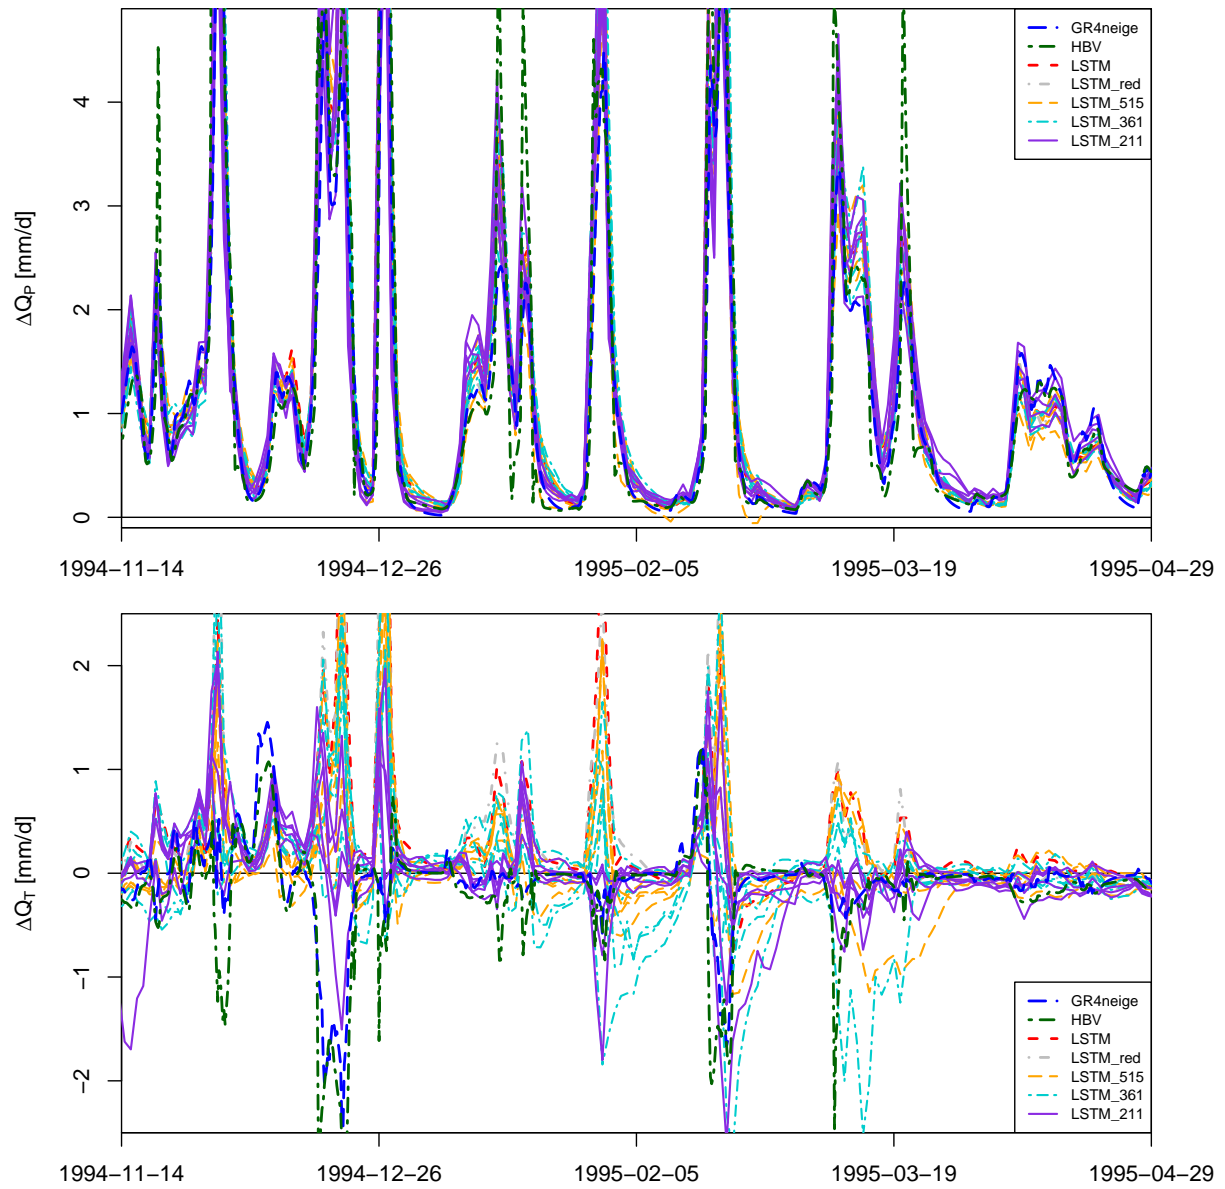

**Figure SL62.** Sensitivities for basin 12013500, Nov. 1994 - April 1995 (part of validation). See Fig. 6 for an explanation of the plot panels.

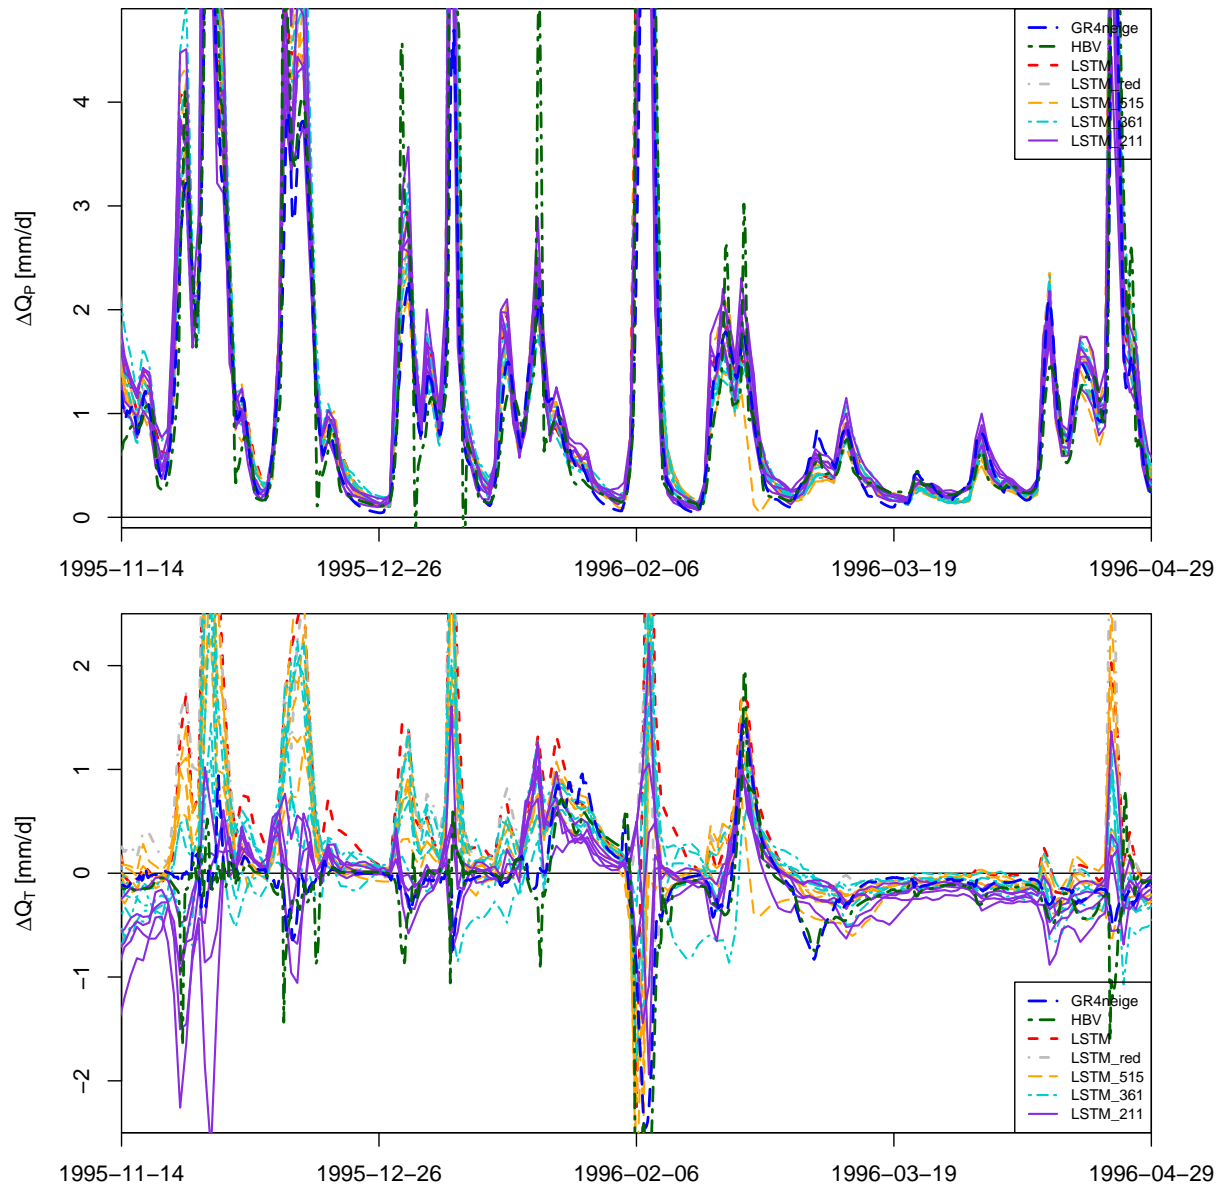

**Figure SL63.** Sensitivities for basin 12013500, Nov. 1995 - April 1996 (part of validation). See Fig. 6 for an explanation of the plot panels.

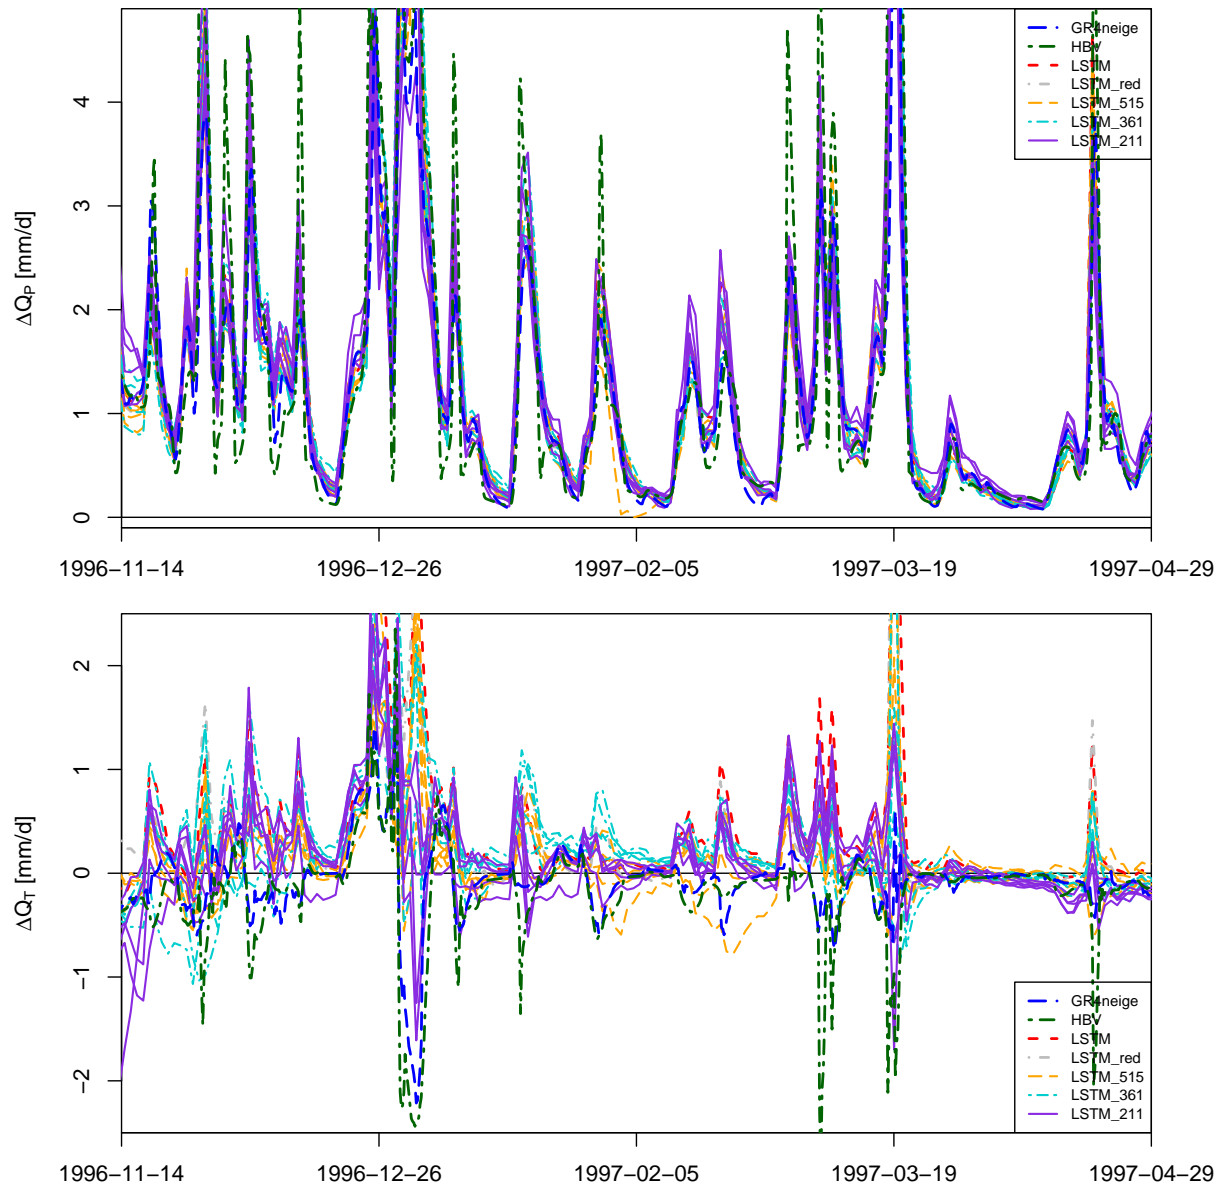

**Figure SL64.** Sensitivities for basin 12013500, Nov. 1996 - April 1997 (part of validation). See Fig. 6 for an explanation of the plot panels.
